# Supplementary material for: Catalyst free boron carbon bond cleavage and facile formation of five-membered PNBCC heterocycles
Source: Royal Society of Chemistry journal article supplement (doi:10.1039/c7dt03565a), 2017-01-01
Supplement: c7dt03565a1.pdf [file c7dt03565a1.pdf]

**Supporting Information**  
*for*  
**Catalyst Free Boron Carbon Bond Cleavage and Facile Formation**  
**of Five-membered PNBCC Heterocycles**

Rajarshi Dasgupta,<sup>a</sup> Atanu Panda,<sup>a</sup> Shiv Pal,<sup>a</sup> Puthan Veetil Muhasina,<sup>b</sup> Susmita De,<sup>b</sup> Pattiyil

Parameswaran<sup>\*b</sup> and Shabana Khan<sup>\*a</sup>

**Content:**

S1. Experimental Section

S2. Table for Crystal Data and Structure Refinement for **1**, **2** and **3**

S3. IR data

S4. NMR Spectra of **1-4**

S5. Computational Details

S6. References

## S1. Experimental Section

All manipulations were performed under a dry and oxygen-free atmosphere ( $N_2$ ) using standard Schlenk techniques and in a dinitrogen filled MBRAUN MB 150-G1 glovebox. All the glassware was oven-dried at 120 °C overnight. The solvents used were purified by MBRAUN solvent purification system MB SPS-800. All other chemicals were purchased from Aldrich were used without further purification.  $^1H$ ,  $^{13}C$ ,  $^{31}P$ ,  $^{11}B$ , NMR spectra were recorded in  $CDCl_3$  on a Bruker Ascend 400 MHz spectrometer using an internal standard ( $SiMe_4$  for  $^1H$ ,  $^{13}C$ , Triphenyl phosphate (TPP) for  $^{31}P$ , and  $BF_3 \cdot OEt_2$  for  $^{11}B$ ). Mass spectra were recorded using AB Sciex, 4800 plus MALDI TOF/TOF and HRMS. Melting points were recorded in a sealed glass tube on a Stuart SMP-30 melting point apparatus. Fourier transform infrared (FT-IR) spectra were taken on a PerkinElmer spectrophotometer. The phosphine substituted amino-borane [ $N(2,6-iPr_2C_6H_3)(PPh_2)(BCy_2)$ ] (**1**) was prepared according to standard literature method.<sup>1</sup>

**Synthesis of 2:** A toluene solution (30 mL) of **1** (0.300 g, 0.558 mmol) was taken and to this solution dimethyl acetylene dicarboxylate (DMAD) (0.079 g, 0.07 mL, 0.56 mmol) was added under the flow of argon and allowed to stir at room temperature for 12 h. The solution was filtered over celite and reduced to 5 mL. The storage of this solution at 0 °C afforded off-white crystals of **2**. Yield (0.070 g, 23%). Mp. 104 °C.  $^1H$  NMR ( $CDCl_3$ , 400 MHz, ppm):  $\delta$  1.06–1.08 (*d*, 12H,  $J = 7.1$  Hz,  $2(CH_3)_2CH$ ), 0.87–0.99; 1.18–1.77 (*m*, 22H, cyclohexyl), 3.46–3.87 (*br*, 8H,  $2(CH_3)_2CH + 2CO_2CH_3$ ), 7.07–7.78 (*m*, 13H, Ph).  $^{13}C\{^1H\}$  NMR ( $CDCl_3$ , 100.613 MHz, ppm):  $\delta$  23.68, 28.23, 123.23, 128.04, 131.97, 142.75, 147.08.  $^{31}P\{^1H\}$  NMR ( $CDCl_3$ , 161.976 MHz, ppm):  $\delta$  21.61.  $^{11}B$  NMR ( $CDCl_3$ , 128.387 MHz, ppm):  $\delta$  32.31 (*br*). MALDI: Calcd for  $C_{42}H_{55}BNO_4P$  (679.68):  $m/z$  679.39. Found:  $m/z$  701.16 ( $[M + Na]^+$ ). Anal. Calcd. C, 74.22; H, 8.16; N, 2.06. Found: C, 73.87; H, 7.78; N, 1.59.

**Synthesis of 3:** A toluene solution (30 mL) of **1** (0.300 g, 0.558 mmol) ) was taken in a 100 mL Schlenk flask and to this solution of diethyl acetylene dicarboxylate (DEAD) (0.095 g, 0.56 mmol) was added under the flow of argon and allowed to stir at room temperature for 12 h. The toluene solution was filtered over celite and reduced to 5 mL. Storing this solution at 0 °C afforded off-white crystals of **3**. Yield (0.09 g, 26 %). Mp. 110 °C. <sup>1</sup>H NMR (CDCl<sub>3</sub>, 400 MHz, ppm): δ 1.05-1.07 (*d*, 12H, *J* = 7.23 Hz, (CH<sub>3</sub>)<sub>2</sub>CH), 1.22-1.35; 1.67-1.76 (*m*, 22H, cyclohexyl), 3.45-3.64; 4.01-4.34 (merged peaks) (12H) (*m*) [6H [2CH<sub>3</sub>, CO<sub>2</sub>Et]], + [2H, 2(CH<sub>3</sub>)<sub>2</sub>CH + 4H (2CH<sub>2</sub>, CO<sub>2</sub>Et)], 7.06–7.77 (*m*, 13H, Ph). <sup>13</sup>C{<sup>1</sup>H} NMR (CDCl<sub>3</sub>, 100.613 MHz, ppm): δ 23.50, 28.16, 123.54, 127.01, 128.51, 131.88, 132.81, 147.33. <sup>31</sup>P{<sup>1</sup>H} NMR (CDCl<sub>3</sub>, 161.976 MHz, ppm): δ 21.52. <sup>11</sup>B NMR (CDCl<sub>3</sub>, 128.387 MHz, ppm): δ 32.02 (*br*). MALDI: Calcd for C<sub>44</sub>H<sub>59</sub>BNO<sub>4</sub>P (707.74): *m/z* 707.42. Found: *m/z* 707.49 ([M]<sup>+</sup>). Anal. Calcd. C, 74.67; H, 8.40; N, 1.98. Found: C, 74.08; H, 8.13; N, 1.78.

**Synthesis of 4:** A THF solution (20 mL) of **1** (0.30 g, 0.558 mmol) ) was taken in a 100 mL Schlenk flask and to this solution acetylene dicarboxylic acid (0.063 g, 0.56 mmol) was added under the flow of argon and allowed to stir at room temperature for 12 h. The THF solution was evaporated under vacuum and the remaining solid residue was extracted with toluene (30 mL). Subsequently, the toluene solution was reduced to 5 mL and kept at 0 °C to yield off-white crystals of **4**. Yield (0.087 g, 27%). Mp. 66 °C. <sup>1</sup>H NMR (CDCl<sub>3</sub>, 400 MHz, ppm): δ 1.06–1.08 (*d*, 12H, *J* = 7.17 Hz, 2(CH<sub>3</sub>)<sub>2</sub>CH), 0.91-0.97; 1.18–2.34 (*m*, 22H, cyclohexyl), 3.56-3.66 (*br*, 2H, (CH<sub>3</sub>)<sub>2</sub>CH), 4.51 (*s*, 2H, 2COOH) 7.07–7.78 (*m*, 13H, Ph). <sup>13</sup>C{<sup>1</sup>H} NMR (CDCl<sub>3</sub>, 100.613 MHz, ppm): δ 23.34, 28.24, 123.20, 128.31, 131.79, 147.29. <sup>31</sup>P{<sup>1</sup>H} NMR (CDCl<sub>3</sub>, 161.976 MHz, ppm): δ 22.10. <sup>11</sup>B NMR (CDCl<sub>3</sub>, 128.387 MHz, ppm): δ 33.61 (*br*). MALDI: Calcd for

C<sub>40</sub>H<sub>51</sub>BNO<sub>4</sub>P (651.63): *m/z* 651.36. Found: *m/z* 674.28 ([M + Na]<sup>+</sup>). Anal. Calcd. C, 73.73; H, 7.89; N, 2.15. Found: C, 72.29; H, 7.58; N, 1.93.

## S2. Table for Crystal Data and Structure Refinement for 1, 2 and 3.

Single crystals of suitable size, were coated with paraffin oil was mounted for all the complexes. Crystal data for all the complexes were collected on a Bruker S9 Smart Apex Duo diffractometer at 100 K using Mo K $\alpha$  radiation ( $\lambda$  = 0.71073 Å) for Compound **1** and Cu K $\alpha$  radiation ( $\lambda$  = 1.54178 Å) for Compounds **2** and **3**. Collected data were integrated by using SAINT and then absorption correction was done by multi-scan method using SADABS program All the structures were solved by direct methods and refined by full-matrix least-squares methods against F<sup>2</sup> (SHELXL-2014/6). CCDC no. are 1543526 (**1**), 1543527 (**2**), 1543528 (**3**).

Table S<sup>1</sup>. Crystal Data and Structure Refinement for 1, 2 and 3.

|                                        | <b>1</b>                                                            | <b>2</b>                                                            | <b>3</b>                                                            |
|----------------------------------------|---------------------------------------------------------------------|---------------------------------------------------------------------|---------------------------------------------------------------------|
| <b>Chemical formula</b>                | C <sub>36</sub> H <sub>49</sub> BNP                                 | C <sub>49</sub> H <sub>63</sub> BNO <sub>4</sub> P                  | C <sub>44</sub> H <sub>59</sub> BNO <sub>4</sub> P                  |
| <b>Formula weight</b>                  | 537.54 g/mol                                                        | 771.78 g/mol                                                        | 707.70 g/mol                                                        |
| <b>Temperature</b>                     | 100(2) K                                                            | 100(2) K                                                            | 100(2) K                                                            |
| <b>Wavelength</b>                      | 0.71073 Å                                                           | 1.54178 Å                                                           | 1.54178 Å                                                           |
| <b>Crystal system</b>                  | Monoclinic                                                          | Triclinic                                                           | Monoclinic                                                          |
| <b>Space group</b>                     | <i>P</i> 2 <sub>1</sub> /n                                          | <i>P</i> -1                                                         | <i>P</i> 2 <sub>1</sub> /c                                          |
| <b>Unit cell dimensions</b>            | <i>a</i> = 17.885(9) Å                                              | <i>a</i> = 10.6838(12) Å                                            | <i>a</i> = 18.4589(7) Å                                             |
|                                        | <i>b</i> = 10.312(5) Å                                              | <i>b</i> = 12.1850(12) Å                                            | <i>b</i> = 10.3146(4) Å                                             |
|                                        | <i>c</i> = 19.369(10) Å                                             | <i>c</i> = 17.8138(18) Å                                            | <i>c</i> = 24.4094(9) Å                                             |
|                                        | $\alpha$ = 90°                                                      | $\alpha$ = 75.008(4)°                                               | $\alpha$ = 90°                                                      |
|                                        | $\beta$ = 115.481(11)°                                              | $\beta$ = 76.864(4)°                                                | $\beta$ = 104.138(2)°                                               |
|                                        | $\gamma$ = 90°                                                      | $\gamma$ = 89.922(3)°                                               | $\gamma$ = 90°                                                      |
| <b>Volume</b>                          | 3225(3) Å <sup>3</sup>                                              | 2177.4(4) Å <sup>3</sup>                                            | 4506.7(3) Å <sup>3</sup>                                            |
| <b>Z</b>                               | 4                                                                   | 2                                                                   | 4                                                                   |
| <b>Density (calculated)</b>            | 1.107 g/cm <sup>3</sup>                                             | 1.177 g/cm <sup>3</sup>                                             | 1.043 g/cm <sup>3</sup>                                             |
| <b>Absorption coefficient</b>          | 0.109 mm <sup>-1</sup>                                              | 0.896 mm <sup>-1</sup>                                              | 0.826 mm <sup>-1</sup>                                              |
| <b>F(000)</b>                          | 1168                                                                | 832                                                                 | 1528                                                                |
| <b>Theta range for data collection</b> | 2.052 to 26.078°                                                    | 2.642 to 69.743°                                                    | 2.468 to 60.015°                                                    |
| <b>Index ranges</b>                    | -21 ≤ <i>h</i> ≤ 21,<br>-12 ≤ <i>k</i> ≤ 12,<br>-23 ≤ <i>l</i> ≤ 22 | -12 ≤ <i>h</i> ≤ 11,<br>-14 ≤ <i>k</i> ≤ 14,<br>-21 ≤ <i>l</i> ≤ 21 | -20 ≤ <i>h</i> ≤ 19,<br>-10 ≤ <i>k</i> ≤ 11,<br>-22 ≤ <i>l</i> ≤ 27 |
| <b>Reflections collected</b>           | 27848                                                               | 30493                                                               | 54285                                                               |

|                                            |                                                               |                                                            |                                                            |
|--------------------------------------------|---------------------------------------------------------------|------------------------------------------------------------|------------------------------------------------------------|
| <b>Independent reflections</b>             | 6302 [R(int) = 0.0646]                                        | 8163 [R(int) = 0.0380]                                     | 6388 [R(int) = 0.1334]                                     |
| <b>Coverage of independent reflections</b> | 99.9%                                                         | 99.7%                                                      | 95.4%                                                      |
| <b>Function minimized</b>                  | $\Sigma w(\text{Fo}^2 - \text{Fc}^2)^2$                       | $\Sigma w(\text{Fo}^2 - \text{Fc}^2)^2$                    | $\Sigma w(\text{Fo}^2 - \text{Fc}^2)^2$                    |
| <b>Data / restraints / parameters</b>      | 6302 / 0 / 356                                                | 8163 / 0 / 512                                             | 6388 / 0 / 466                                             |
| <b>Goodness-of-fit on F<sup>2</sup></b>    | 1.022                                                         | 1.003                                                      | 1.039                                                      |
| <b><math>\Delta/\sigma</math> max</b>      | 0.002                                                         | 0.006                                                      | 0.000                                                      |
| <b>Final R indices</b>                     | 5072 data;<br>[I>2 $\sigma$ (I)]<br>R1 = 0.0413, wR2 = 0.1033 | 7080 data[ I>2 $\sigma$ (I)],<br>R1 = 0.0467, wR2 = 0.1156 | 3553 data[ I>2 $\sigma$ (I)],<br>R1 = 0.0922, wR2 = 0.2031 |
|                                            | all data, R1 = 0.0546, wR2 = 0.1119                           | all data, R1 = 0.0545, wR2 = 0.1210                        | all data, R1 = 0.1683, wR2 = 0.2323                        |
| <b>Largest diff. peak and hole</b>         | 0.251 and -0.294 eÅ <sup>-3</sup>                             | 0.776 and -0.459 eÅ <sup>-3</sup>                          | 0.295 and -0.338 eÅ <sup>-3</sup>                          |
| <b>R.M.S. deviation from mean</b>          | 0.042 eÅ <sup>-3</sup>                                        | 0.055 eÅ <sup>-3</sup>                                     | 0.067 eÅ <sup>-3</sup>                                     |

### S3. IR Data

**Table S<sup>2</sup>.** IR Stretching frequencies of key bonds in the five-membered heterocyclic compounds 2-4.

| COMPOUND | P=C (cm <sup>-1</sup> ) | P-N (cm <sup>-1</sup> ) | B-N (cm <sup>-1</sup> ) | B-C (cm <sup>-1</sup> ) | C=O (cm <sup>-1</sup> ) | C-O/O-H (cm <sup>-1</sup> ) |
|----------|-------------------------|-------------------------|-------------------------|-------------------------|-------------------------|-----------------------------|
| <b>1</b> | -                       | 796.01                  | 1438.52                 | -                       | -                       | -                           |
| <b>2</b> | 1436.02                 | 722.57                  | 1052.37 (b)             | 1201.32                 | 1722.99                 | 1257.48                     |
| <b>3</b> | 1440.74                 | 751.57                  | 1023.43 (b)             | 1256.81                 | 1718.53                 | 1256.81                     |
| <b>4</b> | 1448.11                 | 786.05                  | 1007.55 (b)             | 1257.95                 | 1693.65                 | 3743.54 (b)                 |

#### S4. NMR Spectra of 1-4 (in CDCl<sub>3</sub>)

<sup>1</sup>H NMR spectrum of 2:

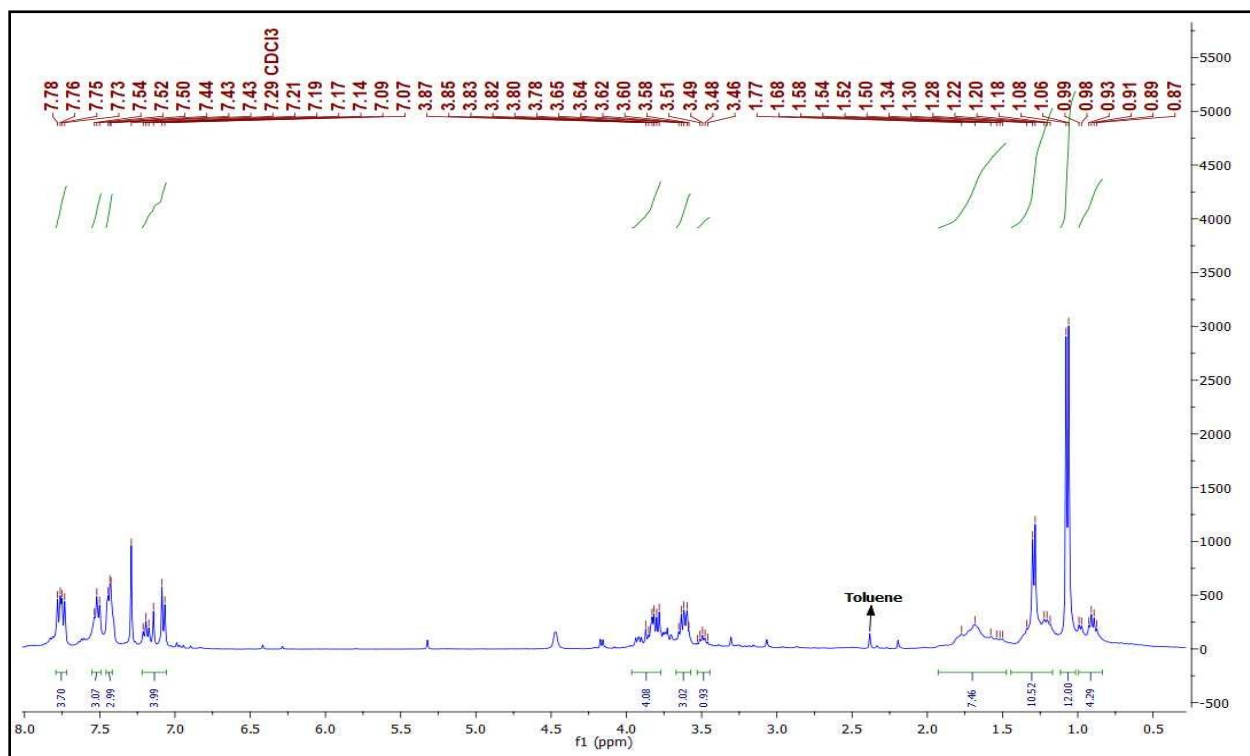

<sup>13</sup>C NMR spectrum of 2:

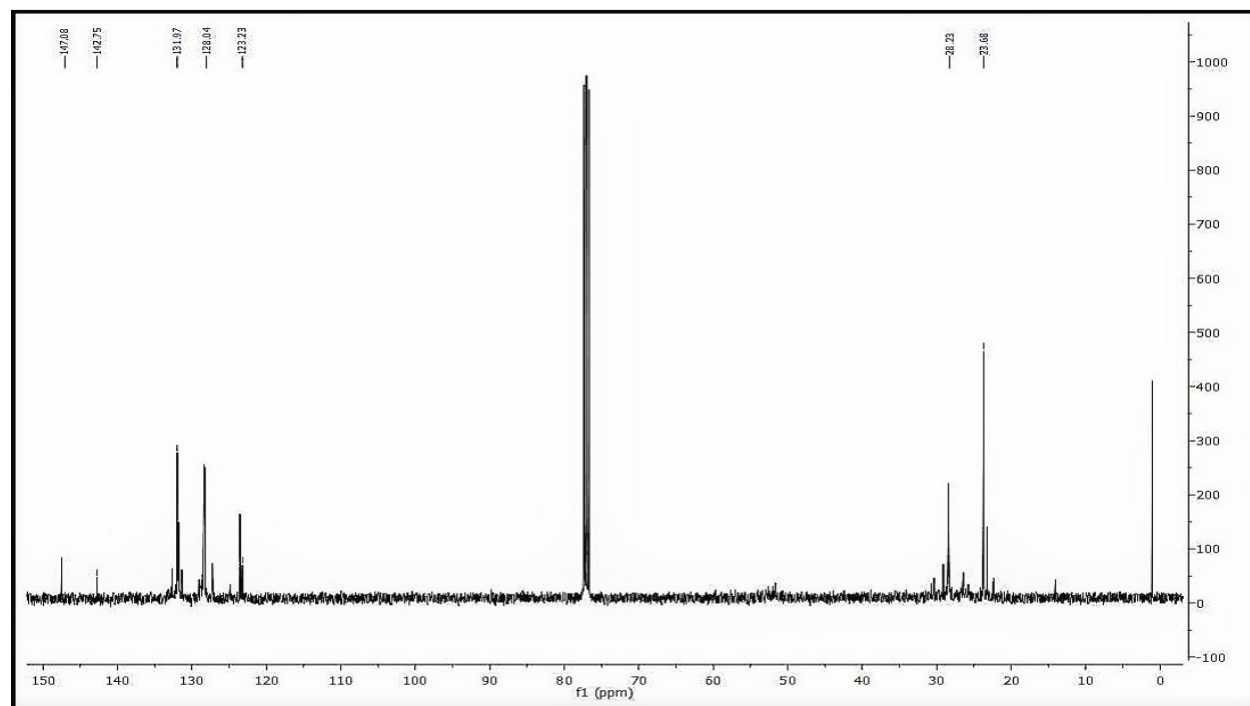

$^{31}\text{P}$  NMR spectrum of **2**:

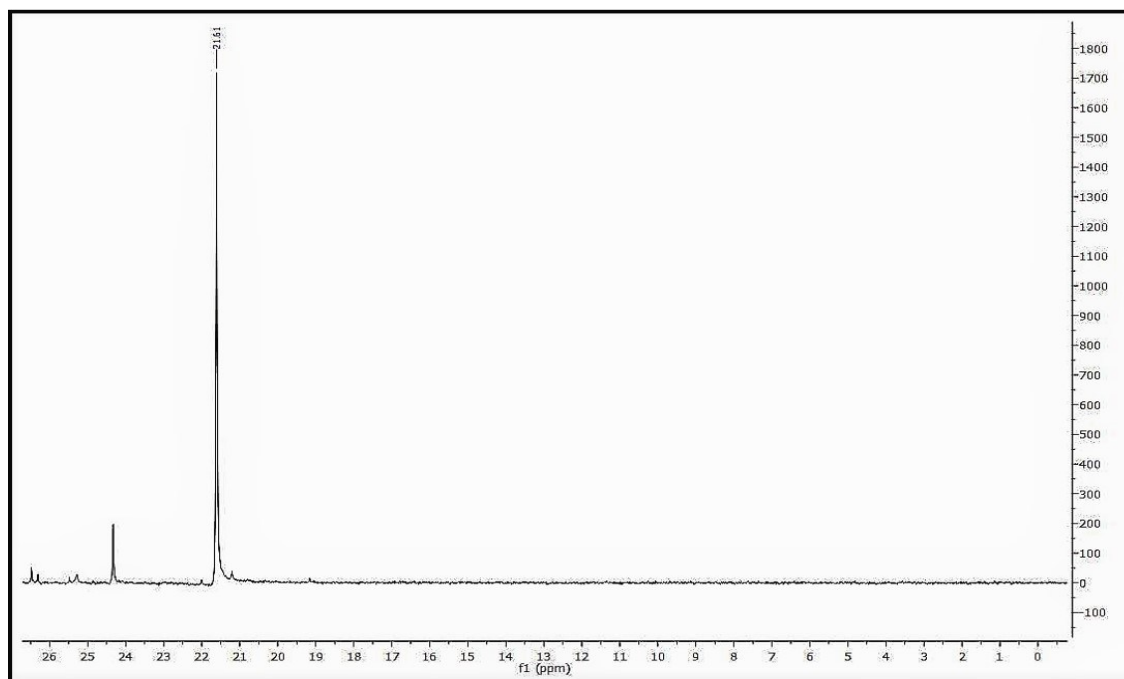

$^1\text{H}$  NMR spectrum of **3**:

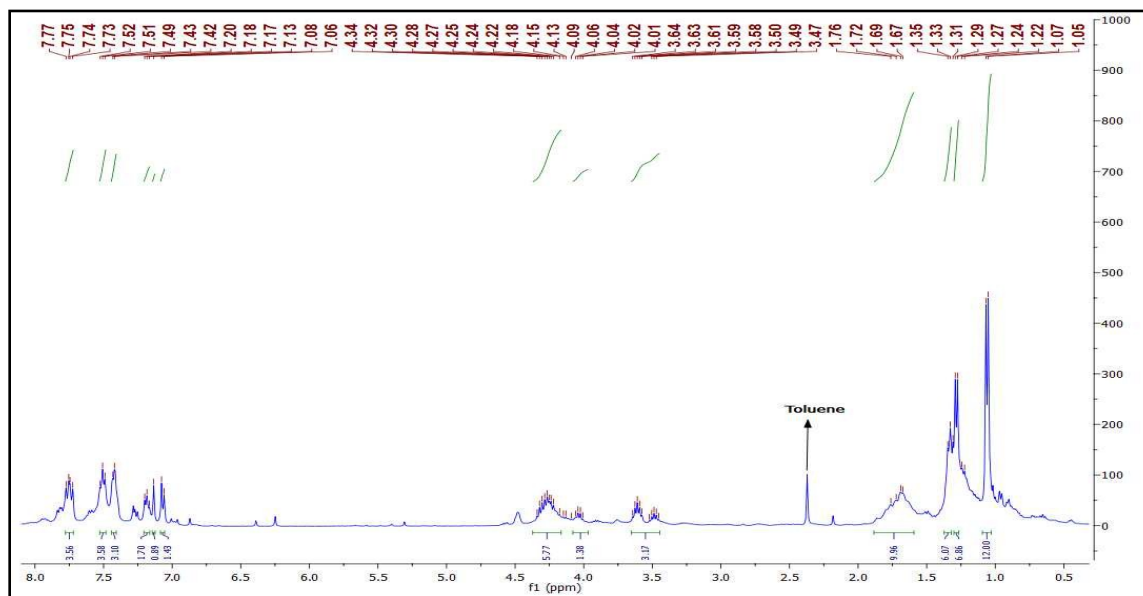

$^{13}\text{C}$  NMR spectrum of **3**:

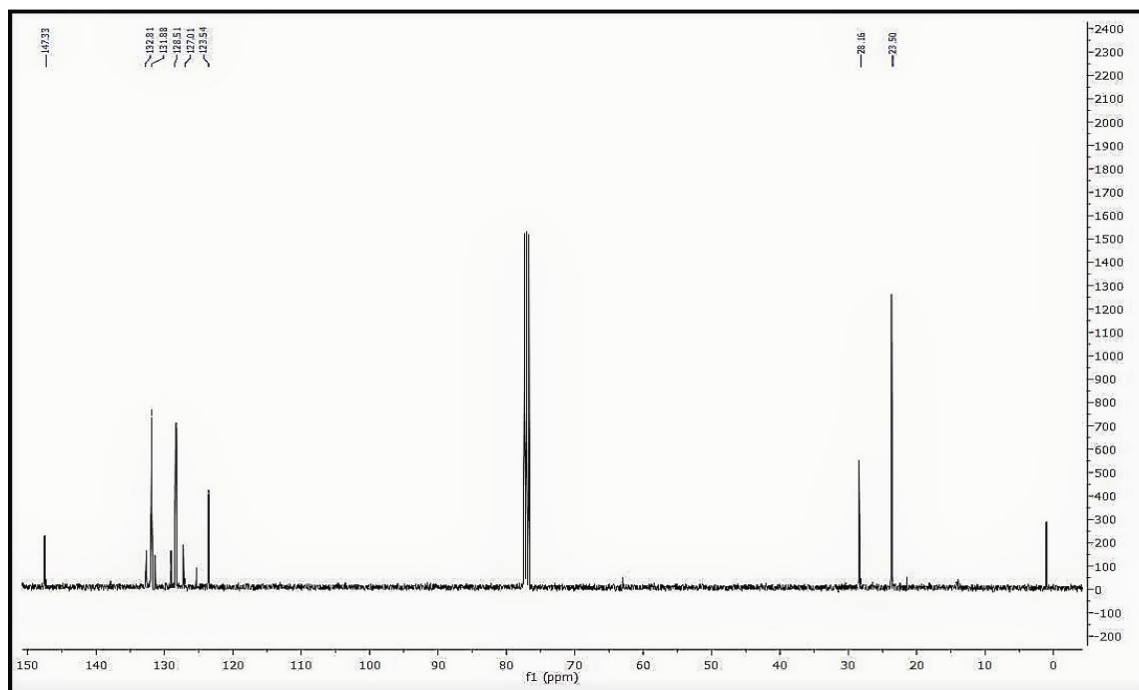

$^{31}\text{P}$  NMR spectrum of **3**:

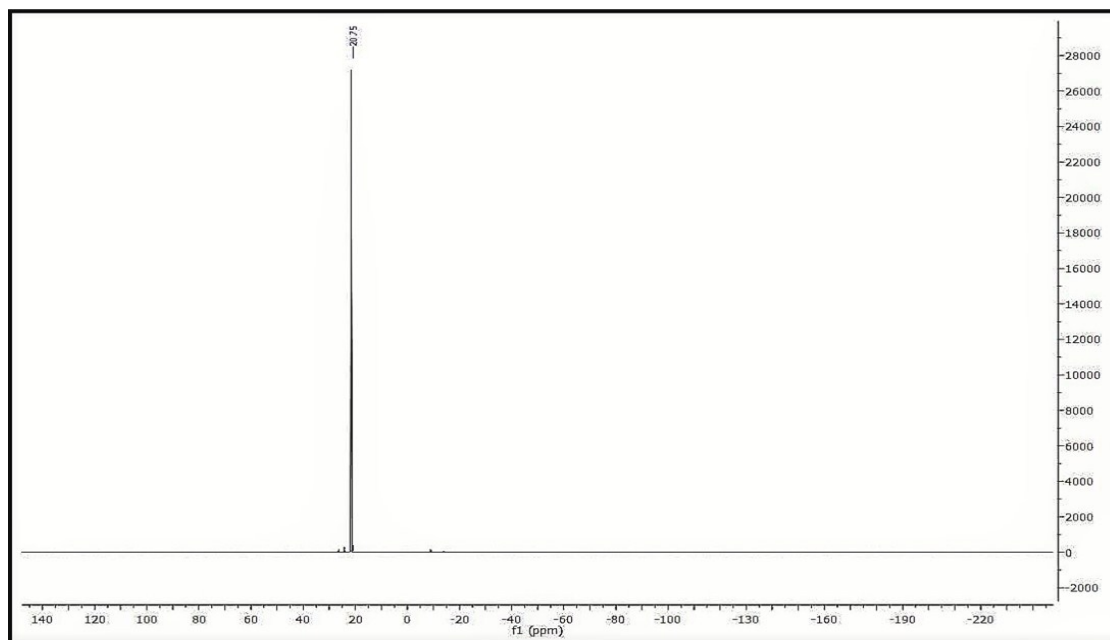



$^1\text{H}$  NMR spectrum of **4**:

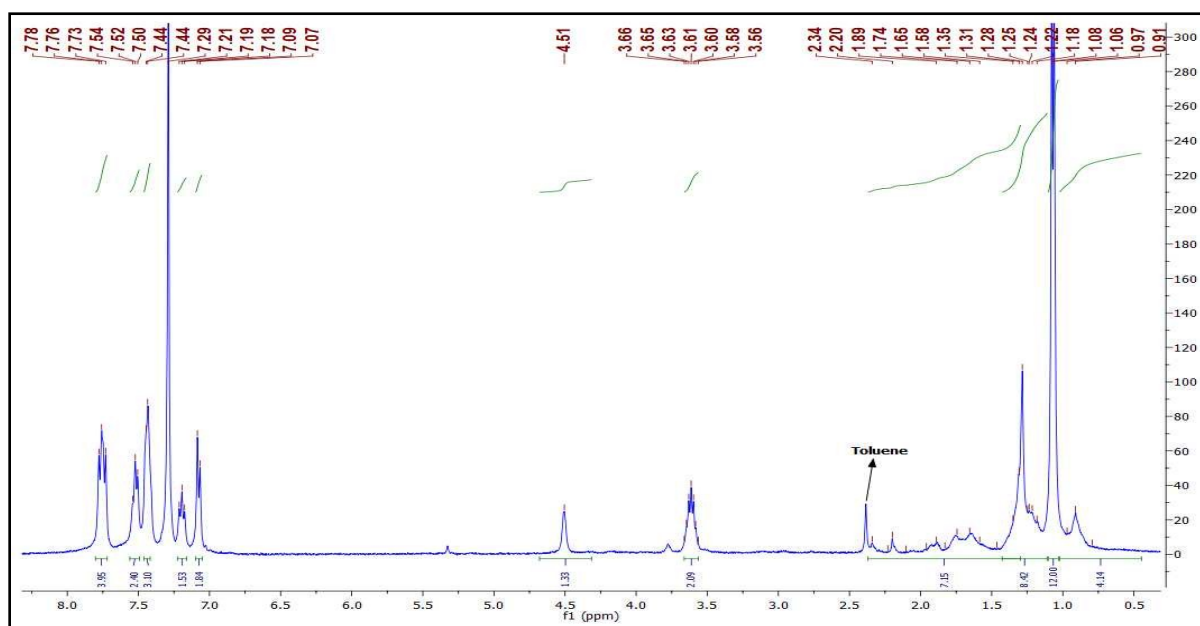

$^{13}\text{C}$  NMR spectrum of **4**:

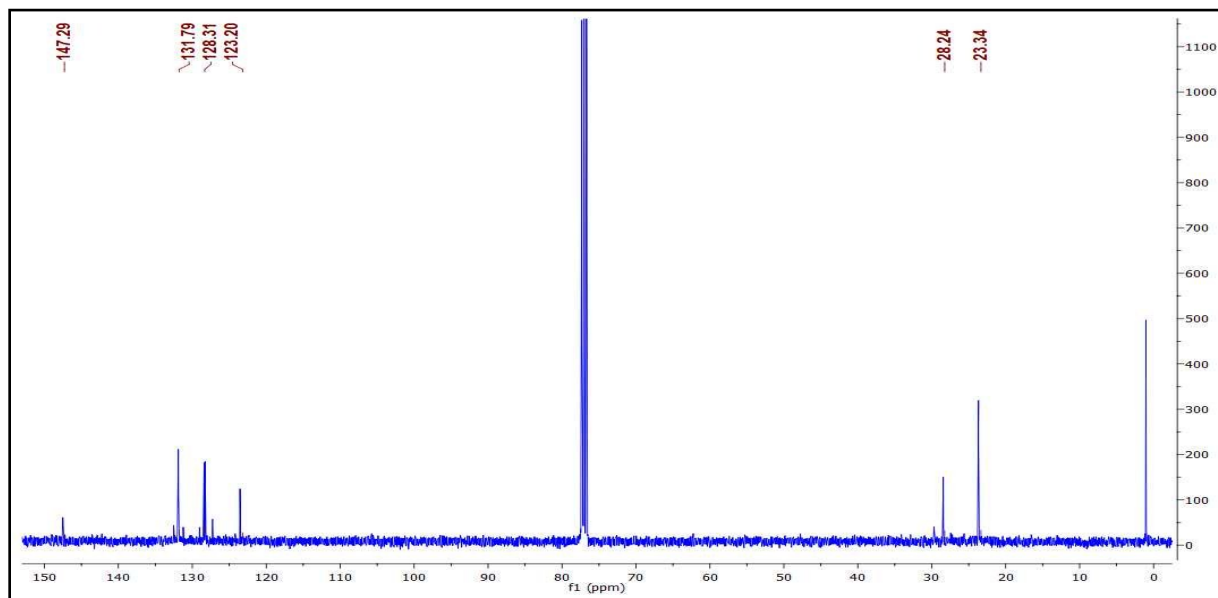

$^{31}\text{P}$  NMR spectrum of **4**:

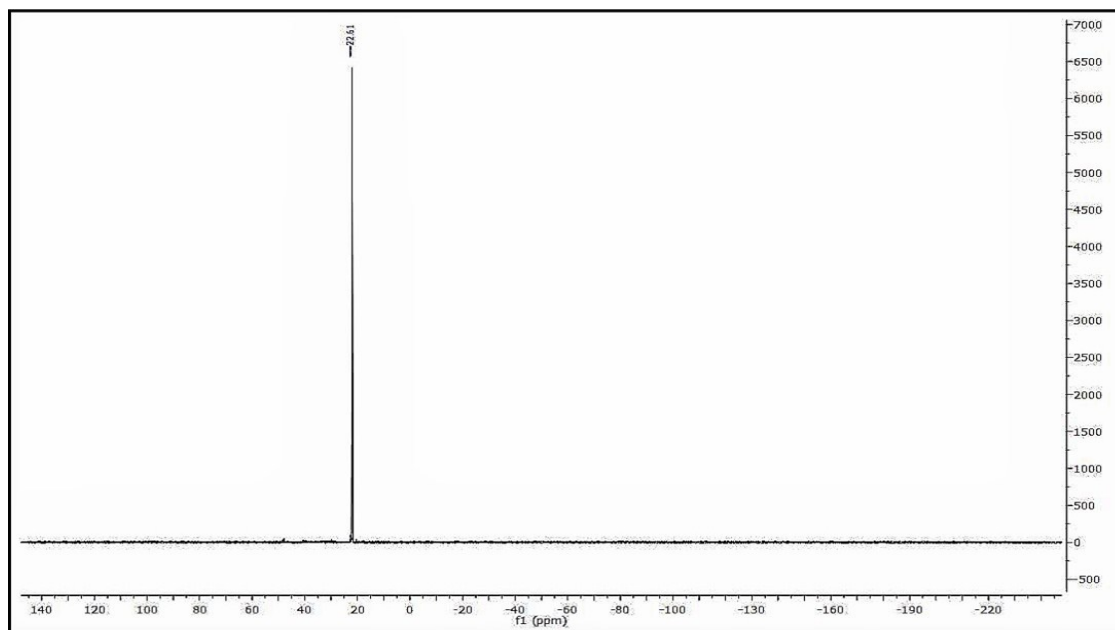

## S5. Computational Details

All the calculations were performed at the DFT level of theory using Gaussian 09 program package.<sup>2</sup> We have used the exchange functional of Becke in conjunction with the correlation functional of Perdew (BP86)<sup>3</sup> with the basis set having double  $\zeta$ -quality augmented with one set of polarization functions (def2-SVP)<sup>4</sup> for the geometry optimization. The single point calculations were performed by using the meta-GGA exchange functional M06<sup>5</sup> with basis set having triple  $\zeta$ -quality augmented by two sets of polarization functions (def2-TZVPP)<sup>4</sup>. The natural bond orbital analysis (NBO)<sup>6</sup> and quantitative analysis of Electrostatic potential (ESP) on the molecular van der Waals surfaces with Multiwfn<sup>7</sup> program have been carried out using M06/def2-TZVPP//BP86/def2-SVP level of theory. We have performed geometry optimization with BP86 (GGA Functional) and single point calculations at the hybrid meta-GGA functional (M06) to get higher accuracy calculation of energetics. Our earlier studies show that optimization at the BP86/def2-SVP level of theory reproduces the experimental geometry quite well and the M06/def2-TZVPP level of theory gives reasonable estimate of the electronic energy.<sup>8</sup> The reaction energy ( $\Delta E$ ) and energy of activation ( $\Delta E^\ddagger$ ) were calculated by adding electronic energy at the M06/def2-TZVPP level of theory with zero point correction calculated at the BP86/def2-SVP level of theory.  $\Delta G$  and  $\Delta G^\ddagger$  (298.5 K and 1atm) represent the free energy of reaction and

free energy of activation calculated by adding electronic energy at the M06/def2-TZVPP level of theory with thermal correction to Gibbs free energy calculated at the BP86/def2-SVP level of theory. All the transition states have been verified by IRC calculations. A. xyz file (Cartesian\_coordinate.xyz) with Cartesian coordinates of all calculated molecules along with computed energies is also given below.

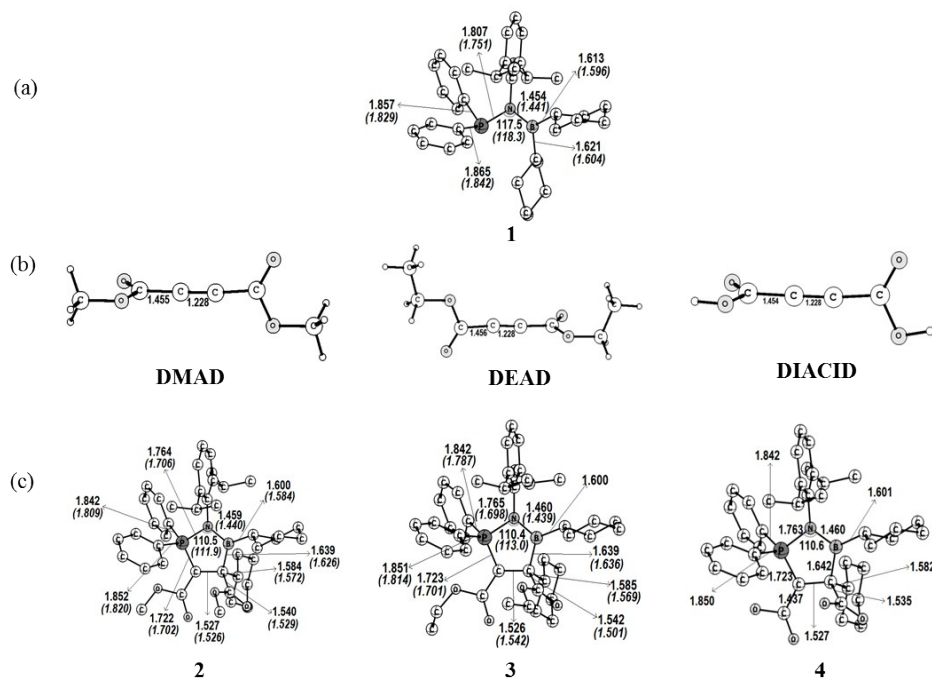

**Figure S1:** Optimized geometries and important geometrical parameters of (a) **1**, (b) alkynes and (c) **2 - 4** at the BP86/def2-SVP level of theory. Experimental values for **1 - 3** are given in parenthesis. Distances are given in angstroms and angles are given in degrees.

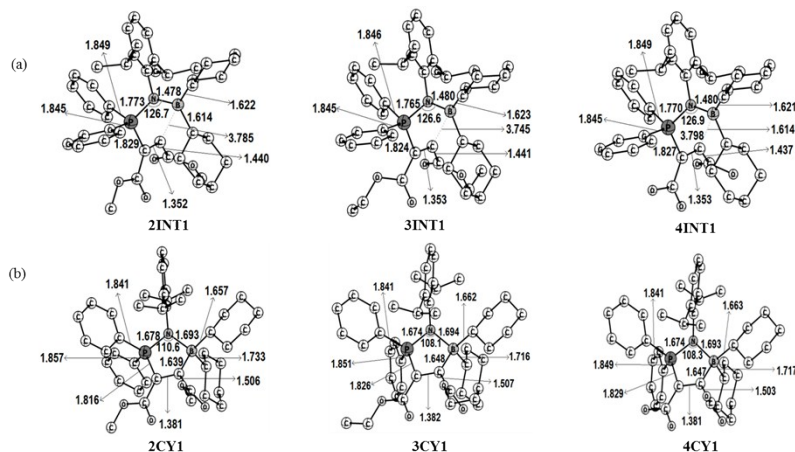

**Figure S<sup>2</sup>:** Optimized geometries and important geometrical parameters of (a) acyclic intermediates (**2INT1** – **4INT1**) and (b) cyclic intermediates (**2CY1** – **4CY1**) at the BP86/def2-SVP level of theory. Distances are given in angstroms and angles in degrees.

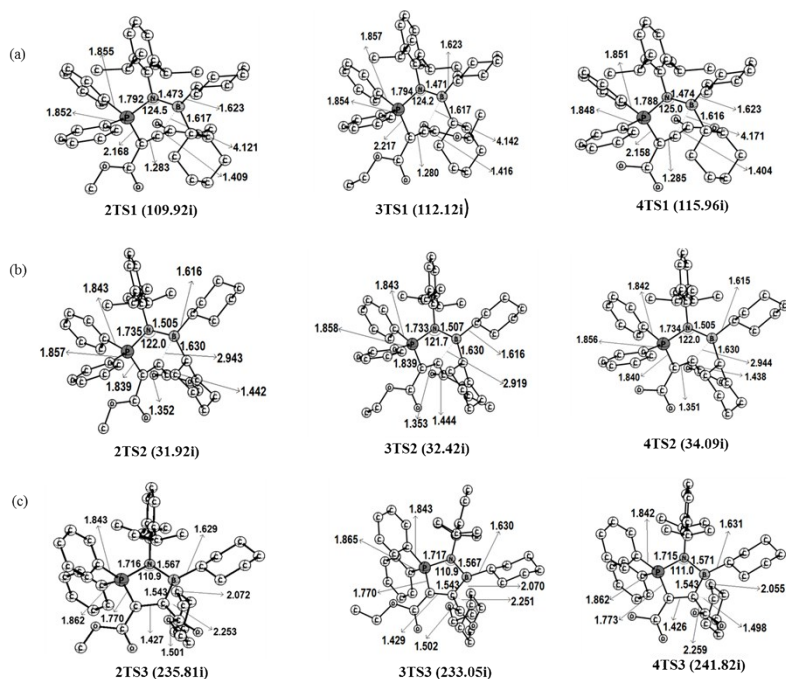

**Figure S<sup>3</sup>:** Optimized geometries and important geometrical parameters of transition states at the BP86/def2-SVP level of theory. Imaginary frequencies in  $\text{cm}^{-1}$  are given in parenthesis. Distances are given in angstroms and angles in degrees.

**Table S<sup>3</sup>:** Charge distribution given by the Natural Population Analysis for **1 – 4**, **INT1** and **CY1** at the M06/def2-TZVPP//BP86/def2-SVP level of theory.  $p_z$  atomic orbital occupancy of N,B and C1 atom of are given in parenthesis.

| Compound | Atoms           |      |                |                 |       |
|----------|-----------------|------|----------------|-----------------|-------|
|          | N               | P    | B              | C1              | C2    |
| 1        | -1.12<br>(1.72) | 1.07 | 1.38<br>(0.26) |                 |       |
| 2INT1    | -1.17           | 1.84 | 1.49           | -0.66           | -0.13 |
| 2CY1     | -1.00           | 1.84 | 0.69           | -0.59           | -0.07 |
| 2        | -1.16<br>(1.71) | 1.85 | 1.50<br>(0.22) | -0.77<br>(1.43) | -0.63 |
| 3INT1    | -1.17           | 1.84 | 1.49           | -0.66           | -0.15 |
| 3CY1     | -1.01           | 1.85 | 0.69           | -0.59           | -0.06 |
| 3        | -1.17<br>(1.75) | 1.86 | 1.51<br>(0.22) | -0.77<br>(1.48) | -0.63 |
| 4INT1    | -1.17           | 1.84 | 1.49           | -0.67           | -0.14 |
| 4CY1     | -1.01           | 1.85 | 0.69           | -0.60           | -0.07 |
| 4        | -1.16<br>(1.61) | 1.85 | 1.49<br>(0.24) | -0.78<br>(1.32) | -0.63 |

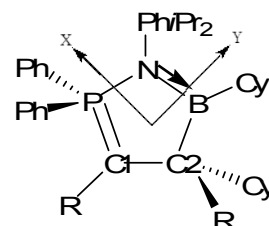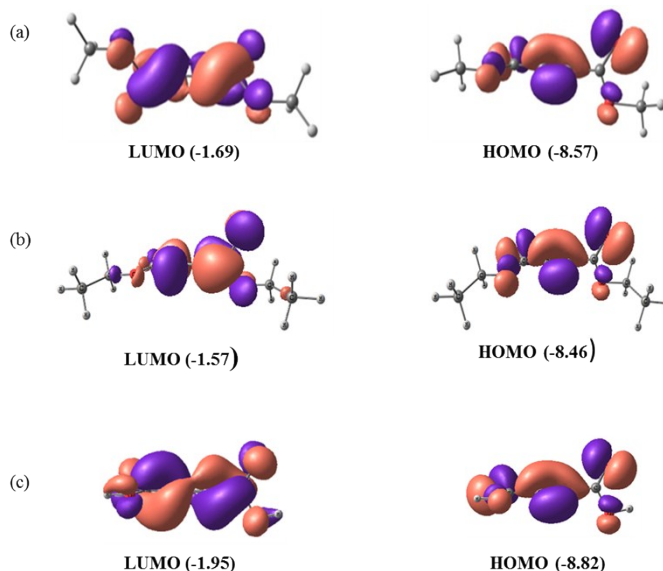

**Figure S<sup>4</sup>.** HOMO and LUMO of (a) **DMAD** (dimethyl acetylene dicarboxylic acid) and (b) **DEAD** (diethyl acetylene dicarboxylic acid) and (c) **DIACID** (acetylene dicarboxylic acid) at the M06/def2-TZVPP//BP86/def2-SVP level of theory. (Energies are given in eV).

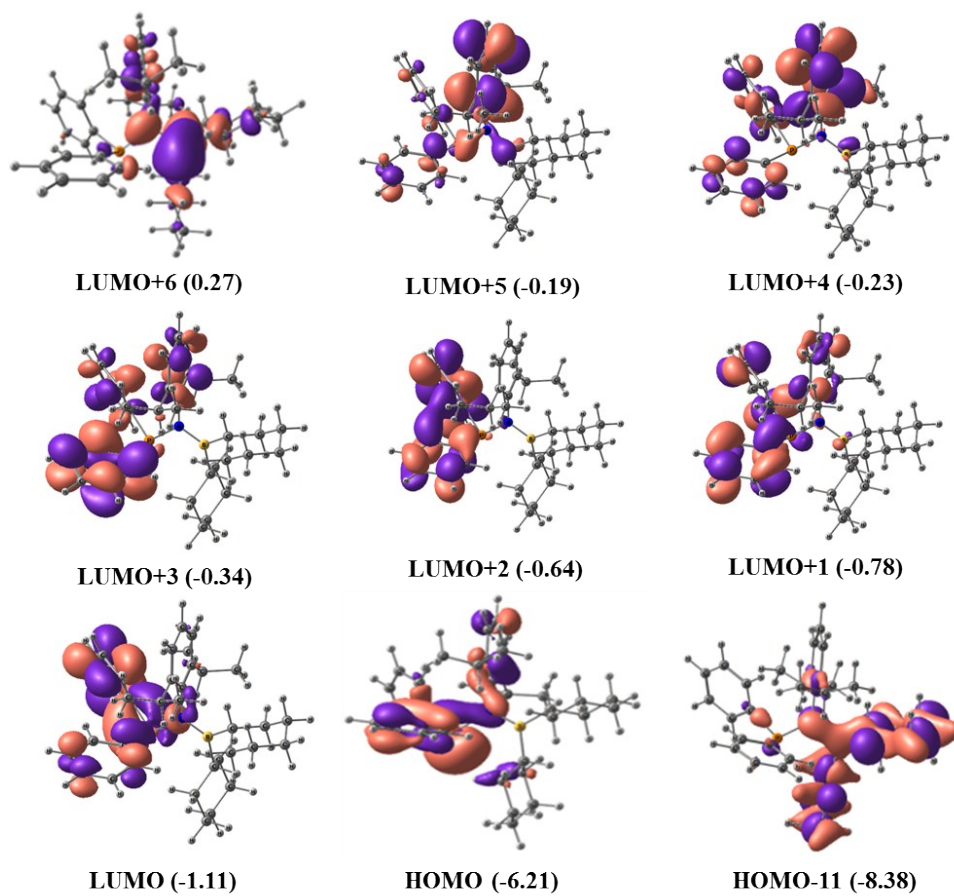

**Figure S<sup>5</sup>.** Important molecular orbitals of **1** at the M06/def2-TZVPP//BP86/def2-SVP level of theory. (Energies are given in eV).

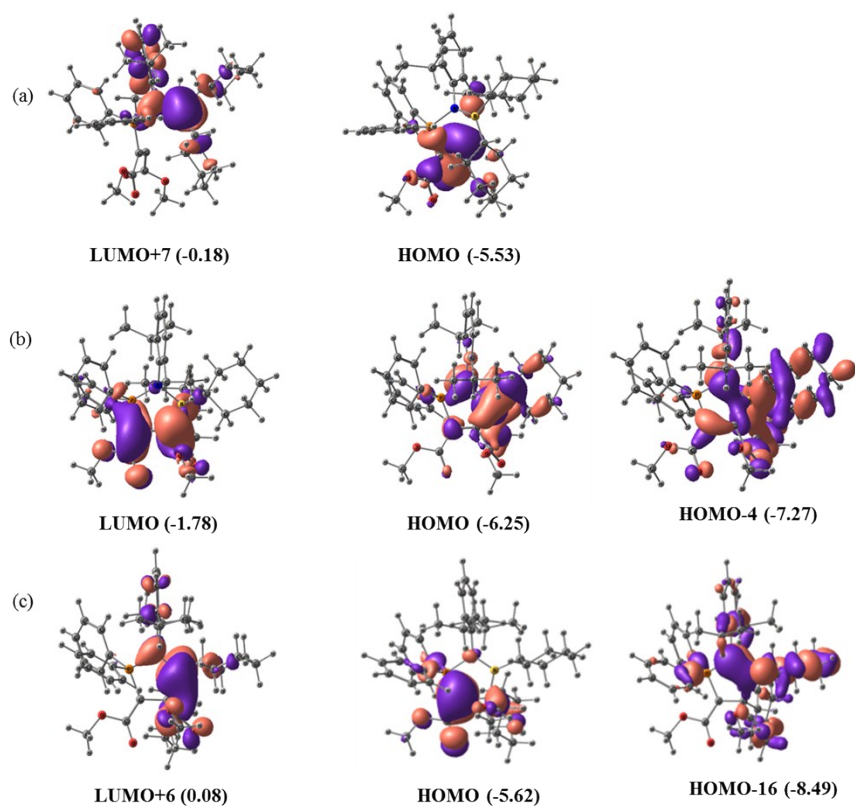

**Figure S<sup>6</sup>.** Important molecular orbitals of (a) **2INT1** and (b) **2CY1** and (c) **2** at the M06/def2-TZVPP//BP86/def2-SVP level of theory. (Energies are given in eV).



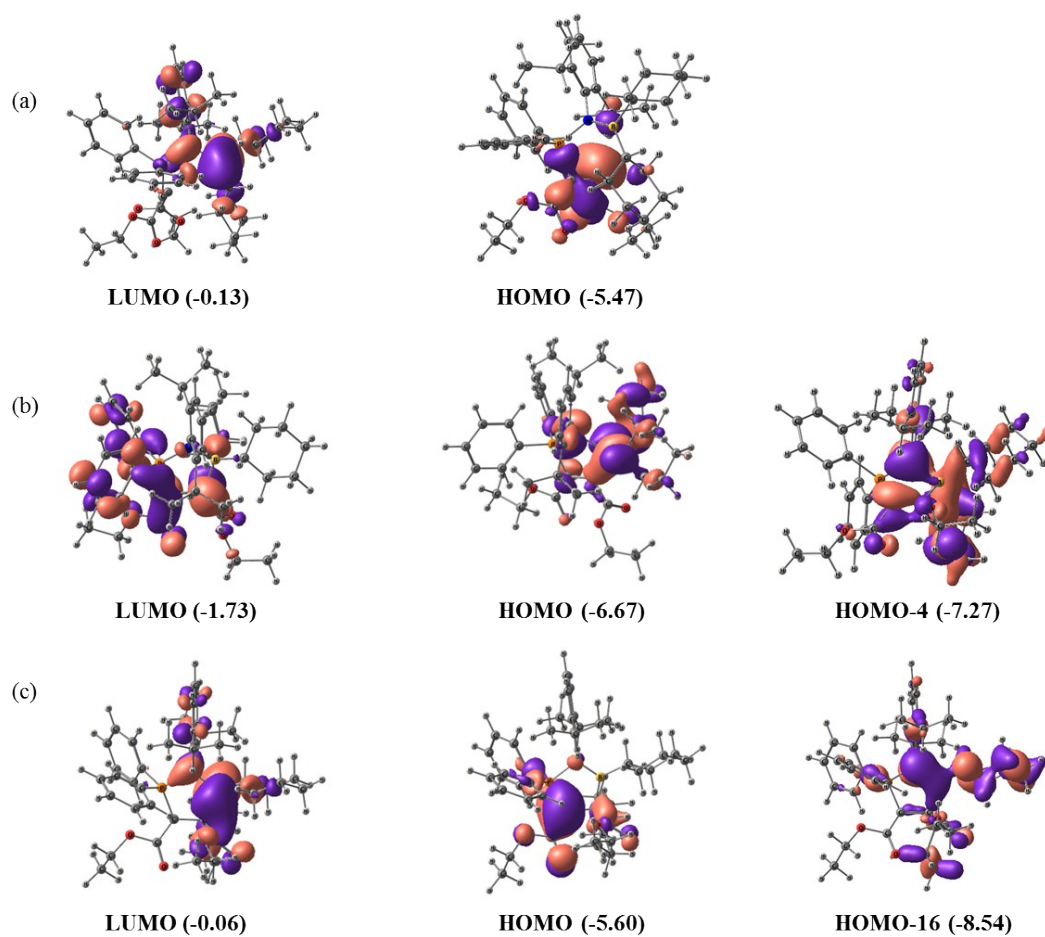

**Figure S7.** Important molecular orbitals of (a) **3INT1** (b) **3CY1** and (c) **3** at the M06/def2-TZVPP//BP86/def2-SVP level of theory. (Energies are given in eV).



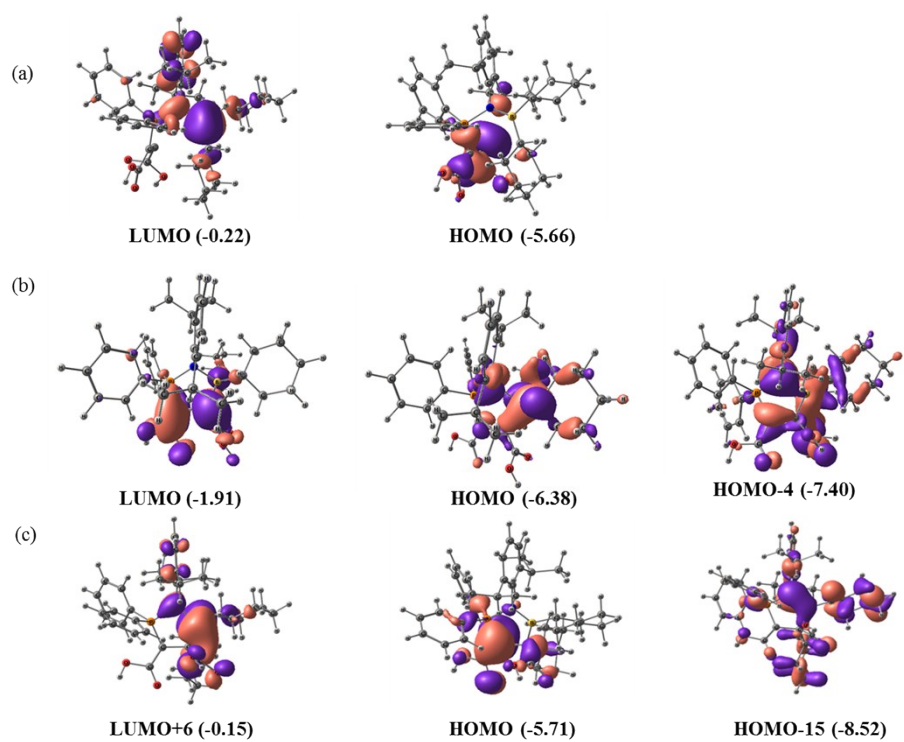

**Figure S8.** Important molecular orbitals of (a) **4INT1** (b) **4CY1** and (c) **4** at the M06/def2-TZVPP//BP86/def2-SVP level of theory. (Energies are given in eV).

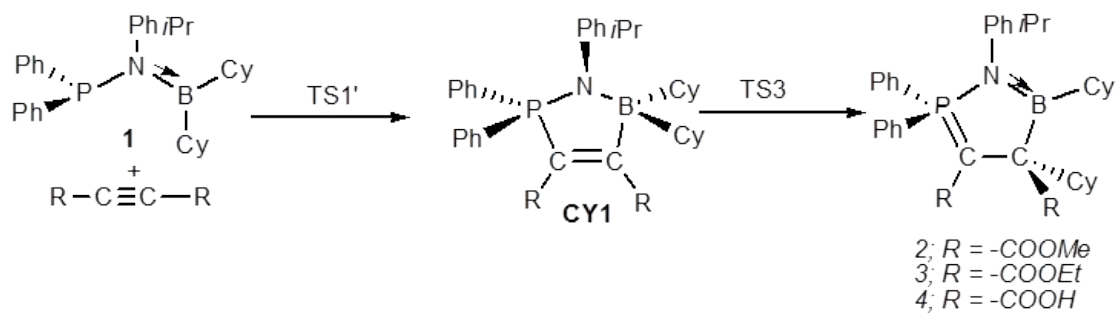

**Scheme S<sup>1</sup>:** Schematic representation of concerted reaction mechanism for the formation of **2**, **3** and **4**.

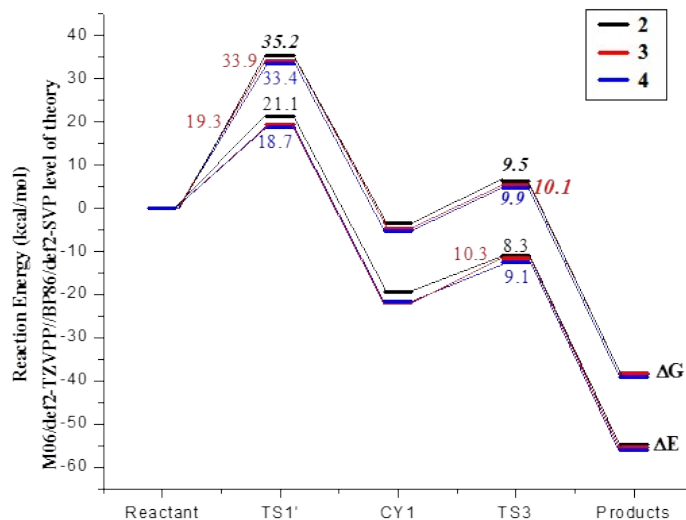

**Figure S<sup>9</sup>:** Reaction energy profile for the formation of compounds **2** - **4** via concerted mechanism at the M06/Def2-TZVPP//BP86/def2-SVP level of theory (Reactant = **1** + alkyne). Activation energies ( $\Delta E^\ddagger$ ) and free energy of activation ( $\Delta G^\ddagger$ , bold and italics) are given in kcal/mol.

### Cartesian Coordinates

88

Electronic Energy (BP86) = -1820.430949 a.u.

Zero-point correction (BP86) = 0.750614 a.u.

Thermal correction to Gibbs free Energy (BP86) = 0.680455 a.u.

Electronic Energy (M06) = -1821.7358367 a.u.

1

|   |              |              |              |
|---|--------------|--------------|--------------|
| P | 1.081610000  | 1.174339000  | -0.475122000 |
| N | -0.123475000 | -0.128094000 | -0.134020000 |
| C | -2.139971000 | 3.904240000  | -2.942742000 |
| H | -2.695014000 | 4.653744000  | -3.548684000 |

|   |              |              |              |
|---|--------------|--------------|--------------|
| H | -1.064135000 | 4.189532000  | -3.002942000 |
| C | -2.592984000 | 3.957272000  | -1.473924000 |
| H | -3.693510000 | 3.782267000  | -1.424977000 |
| H | -2.420446000 | 4.971534000  | -1.051153000 |
| C | -1.873044000 | 2.897932000  | -0.618355000 |
| H | -2.253174000 | 2.946092000  | 0.426154000  |
| H | -0.790502000 | 3.150300000  | -0.570277000 |
| C | -2.058559000 | 1.466127000  | -1.192147000 |
| H | -3.165683000 | 1.320705000  | -1.218277000 |
| C | 1.500215000  | 1.904593000  | 1.188687000  |
| C | 2.828695000  | 2.254942000  | 1.531399000  |
| H | 3.664262000  | 1.943254000  | 0.886364000  |
| C | 3.101265000  | 3.001812000  | 2.691604000  |
| H | 4.144332000  | 3.257466000  | 2.938967000  |
| C | 2.055372000  | 3.416027000  | 3.533196000  |
| H | 2.270230000  | 3.998690000  | 4.443046000  |
| C | 0.321700000  | -1.470152000 | 0.217939000  |
| C | 0.647068000  | -2.371951000 | -0.847388000 |
| C | 1.061607000  | -3.680935000 | -0.527058000 |
| H | 1.306131000  | -4.378680000 | -1.343341000 |
| C | 1.177339000  | -4.110275000 | 0.799995000  |
| H | 1.507062000  | -5.136607000 | 1.027635000  |
| C | 0.868568000  | -3.219824000 | 1.833818000  |
| H | 0.954350000  | -3.556867000 | 2.879417000  |
| C | 0.436758000  | -1.900354000 | 1.575958000  |
| C | 0.105802000  | -1.017964000 | 2.780186000  |
| H | -0.296028000 | -0.063090000 | 2.389046000  |

|   |              |              |              |
|---|--------------|--------------|--------------|
| C | -0.976564000 | -1.649721000 | 3.682351000  |
| H | -1.884446000 | -1.925129000 | 3.109412000  |
| H | -1.278348000 | -0.939308000 | 4.480867000  |
| H | -0.606901000 | -2.568743000 | 4.185113000  |
| C | 1.363078000  | -0.689201000 | 3.613550000  |
| H | 1.817354000  | -1.610056000 | 4.038443000  |
| H | 1.105110000  | -0.020150000 | 4.461049000  |
| H | 2.135320000  | -0.173111000 | 3.009229000  |
| C | 0.559697000  | -1.991357000 | -2.330256000 |
| H | 0.451847000  | -0.889029000 | -2.390061000 |
| C | 1.827056000  | -2.378373000 | -3.120854000 |
| H | 2.747951000  | -1.993773000 | -2.641305000 |
| H | 1.776471000  | -1.963625000 | -4.149590000 |
| H | 1.929638000  | -3.479997000 | -3.221570000 |
| C | -0.684709000 | -2.612478000 | -3.000483000 |
| H | -0.643439000 | -3.722391000 | -2.969433000 |
| H | -0.750643000 | -2.306457000 | -4.066124000 |
| H | -1.621620000 | -2.300710000 | -2.498427000 |
| C | -2.661616000 | -0.795892000 | 0.240337000  |
| H | -2.190899000 | -1.688301000 | 0.712160000  |
| C | -3.711920000 | -1.322984000 | -0.773428000 |
| H | -4.178099000 | -0.465873000 | -1.312441000 |
| H | -3.218718000 | -1.939913000 | -1.554260000 |
| C | -4.826324000 | -2.146740000 | -0.101428000 |
| H | -5.560735000 | -2.488883000 | -0.863404000 |
| H | -4.383232000 | -3.069256000 | 0.340628000  |
| C | -5.533284000 | -1.347638000 | 1.004866000  |

|   |              |              |              |
|---|--------------|--------------|--------------|
| H | -6.309308000 | -1.969393000 | 1.502674000  |
| H | -6.071692000 | -0.485362000 | 0.546822000  |
| C | -4.521648000 | -0.822342000 | 2.035952000  |
| H | -4.075449000 | -1.686897000 | 2.579436000  |
| H | -5.033981000 | -0.203475000 | 2.805377000  |
| C | -3.397409000 | -0.007546000 | 1.367436000  |
| H | -2.674509000 | 0.335005000  | 2.140097000  |
| H | -3.843870000 | 0.917508000  | 0.934099000  |
| C | -2.322314000 | 2.495096000  | -3.531916000 |
| H | -1.950436000 | 2.461502000  | -4.579919000 |
| H | -3.411189000 | 2.259270000  | -3.581126000 |
| C | -1.611627000 | 1.425086000  | -2.681995000 |
| H | -0.510789000 | 1.585475000  | -2.734254000 |
| H | -1.801899000 | 0.417636000  | -3.113323000 |
| C | 2.688790000  | 0.351599000  | -0.909430000 |
| C | 3.271845000  | 0.791639000  | -2.120770000 |
| H | 2.727284000  | 1.517537000  | -2.747228000 |
| C | 4.534477000  | 0.323542000  | -2.527843000 |
| H | 4.975004000  | 0.682191000  | -3.471748000 |
| C | 5.227174000  | -0.602456000 | -1.730176000 |
| H | 6.215067000  | -0.974710000 | -2.045794000 |
| C | 4.656510000  | -1.052737000 | -0.524597000 |
| H | 5.196553000  | -1.778584000 | 0.104107000  |
| C | 3.400924000  | -0.576441000 | -0.112088000 |
| H | 2.975402000  | -0.926002000 | 0.840081000  |
| C | 0.455675000  | 2.350537000  | 2.034043000  |
| H | -0.590739000 | 2.124144000  | 1.777248000  |

|   |              |             |              |
|---|--------------|-------------|--------------|
| C | 0.729541000  | 3.086986000 | 3.197714000  |
| H | -0.101628000 | 3.413731000 | 3.843255000  |
| B | -1.526246000 | 0.179590000 | -0.361804000 |

16

Electronic Energy (BP86) = -532.583295 a.u.

Zero-point correction (BP86) = 0.110949 a.u.

Thermal correction to Gibbs free Energy (BP86) = 0.071929 a.u.

Electronic Energy (M06) = -532.9860602 a.u.

DMAD

|   |              |              |              |
|---|--------------|--------------|--------------|
| O | -2.712463000 | -0.611100000 | 0.533818000  |
| O | 2.712468000  | -0.611043000 | -0.533881000 |
| O | -2.567508000 | 0.985566000  | -1.092478000 |
| O | 2.567500000  | 0.985453000  | 1.092580000  |
| C | -4.145133000 | -0.606006000 | 0.384426000  |
| C | 4.145137000  | -0.605964000 | -0.384478000 |
| C | -2.047521000 | 0.244228000  | -0.276948000 |
| C | 2.047519000  | 0.244198000  | 0.276971000  |
| C | -0.611771000 | 0.168653000  | -0.054249000 |
| C | 0.611771000  | 0.168646000  | 0.054252000  |
| H | -4.559213000 | 0.398464000  | 0.606786000  |
| H | -4.433072000 | -0.885045000 | -0.649534000 |
| H | 4.559218000  | 0.398526000  | -0.606749000 |
| H | 4.433068000  | -0.885091000 | 0.649461000  |
| H | -4.524661000 | -1.350248000 | 1.106999000  |
| H | 4.524669000  | -1.350143000 | -1.107113000 |

22

Electronic Energy (BP86) = -611.104374 a.u.

Zero-point correction (BP86) = 0.16602 a.u.

Thermal correction to Gibbs free Energy (BP86) = 0.122573 a.u.

Electronic Energy (M06) = -611.5848154 a.u.

DEAD

|   |              |              |              |
|---|--------------|--------------|--------------|
| O | 2.706322000  | 0.377824000  | 0.060027000  |
| O | -2.737982000 | -0.071004000 | -0.719755000 |
| O | 2.514944000  | -1.835742000 | -0.472265000 |
| O | -2.552891000 | -0.627559000 | 1.494847000  |
| C | 4.148960000  | 0.285258000  | -0.092298000 |
| C | -4.182658000 | 0.046557000  | -0.589498000 |
| C | 2.020526000  | -0.765596000 | -0.160808000 |
| C | -2.059643000 | -0.409097000 | 0.401046000  |
| C | 0.590429000  | -0.562989000 | 0.019699000  |
| C | -0.629800000 | -0.487121000 | 0.139995000  |
| H | 4.530361000  | -0.482240000 | 0.615045000  |
| H | 4.374497000  | -0.079711000 | -1.117262000 |
| H | -4.538032000 | -0.719583000 | 0.129436000  |
| H | -4.566319000 | -0.193480000 | -1.600731000 |
| C | -4.589950000 | 1.447099000  | -0.150299000 |
| H | -4.189863000 | 2.215165000  | -0.842874000 |
| H | -5.696651000 | 1.529848000  | -0.143874000 |
| H | -4.225341000 | 1.663062000  | 0.873600000  |
| C | 4.734338000  | 1.659780000  | 0.174845000  |
| H | 5.837774000  | 1.623628000  | 0.070127000  |
| H | 4.342482000  | 2.407884000  | -0.543582000 |
| H | 4.494735000  | 2.003923000  | 1.201194000  |

Electronic Energy (BP86) = -454.095632 a.u.

Zero-point correction (BP86) = 0.057168 a.u.

Thermal correction to Gibbs free Energy (BP86) = 0.023253 a.u.

Electronic Energy (M06) = -454.4234688 a.u.

DIACID

|   |              |              |              |
|---|--------------|--------------|--------------|
| O | -2.668669000 | -0.777917000 | -0.781490000 |
| O | 2.668601000  | 0.777966000  | -0.781486000 |
| O | -2.650689000 | 0.845688000  | 0.816844000  |
| O | 2.650759000  | -0.845703000 | 0.816774000  |
| H | -3.635658000 | -0.644306000 | -0.654390000 |
| H | 3.635604000  | 0.644394000  | -0.654446000 |
| C | -2.063742000 | 0.083234000  | 0.070153000  |
| C | 2.063748000  | -0.083189000 | 0.070202000  |
| C | -0.614029000 | -0.003600000 | -0.008214000 |
| C | 0.614029000  | 0.003495000  | -0.008192000 |

104

Electronic Energy (BP86) = -2353.083776 a.u.

Zero-point correction (BP86) = 0.866847 a.u.

Thermal correction to Gibbs free Energy (BP86) = 0.783948 a.u.

Electronic Energy (M06) = -2354.8147577 a.u.

2

|   |              |              |              |
|---|--------------|--------------|--------------|
| C | 0.281514000  | -2.902563000 | -1.294569000 |
| C | -2.015476000 | -1.052230000 | -2.065050000 |
| C | -0.068138000 | -1.704919000 | -0.580090000 |
| C | 1.788754000  | -2.291312000 | 2.158785000  |
| H | 1.072415000  | -2.967638000 | 1.666169000  |
| C | 1.366316000  | 2.972254000  | -0.000031000 |



|   |              |              |              |
|---|--------------|--------------|--------------|
| C | 0.690761000  | 2.000088000  | 0.803420000  |
| C | -2.282006000 | 1.697958000  | -0.308923000 |
| H | -1.826740000 | 2.578724000  | 0.206610000  |
| C | -1.450382000 | -1.058263000 | -0.632177000 |
| C | 2.022326000  | -1.020191000 | 1.591266000  |
| C | -2.526452000 | -1.759214000 | 0.295460000  |
| H | -3.502653000 | -1.295738000 | 0.037433000  |
| C | 0.560396000  | 2.208325000  | 2.216803000  |
| C | 2.541469000  | -0.429326000 | -1.212287000 |
| C | -2.673602000 | -3.274676000 | 0.028373000  |
| H | -1.712164000 | -3.778445000 | 0.271313000  |
| H | -2.855556000 | -3.457179000 | -1.047388000 |
| C | -2.279702000 | -1.530156000 | 1.798462000  |
| H | -2.233770000 | -0.442843000 | 2.021262000  |
| H | -1.282883000 | -1.948764000 | 2.068324000  |
| C | 2.159846000  | -0.363852000 | -2.572797000 |
| H | 1.088541000  | -0.392961000 | -2.831163000 |
| C | 1.963372000  | 4.081314000  | 0.638444000  |
| H | 2.489776000  | 4.828498000  | 0.023684000  |
| C | 1.411311000  | 2.940644000  | -1.529020000 |
| H | 0.948320000  | 1.990034000  | -1.861745000 |
| C | -2.517318000 | 2.137752000  | -1.790020000 |
| H | -1.554642000 | 2.292380000  | -2.319722000 |
| H | -3.042259000 | 1.318214000  | -2.327118000 |
| C | 1.888547000  | 4.263481000  | 2.022698000  |
| H | 2.367425000  | 5.134767000  | 2.497380000  |
| C | 2.485726000  | -2.687794000 | 3.312863000  |

|   |              |              |              |
|---|--------------|--------------|--------------|
| H | 2.299580000  | -3.682321000 | 3.748250000  |
| C | -0.292002000 | 1.323630000  | 3.128768000  |
| H | -0.530235000 | 0.397847000  | 2.571119000  |
| C | 1.173292000  | 3.340462000  | 2.793263000  |
| H | 1.079515000  | 3.500972000  | 3.878748000  |
| C | 3.913295000  | -0.461174000 | -0.880897000 |
| H | 4.233495000  | -0.557756000 | 0.166009000  |
| C | 2.959972000  | -0.147127000 | 2.191908000  |
| H | 3.142558000  | 0.854473000  | 1.773883000  |
| C | -1.540450000 | -0.715204000 | -4.356504000 |
| H | -1.809377000 | -1.755860000 | -4.627895000 |
| H | -0.693281000 | -0.365299000 | -4.975706000 |
| H | -2.426247000 | -0.065989000 | -4.513516000 |
| C | 3.659245000  | -0.553872000 | 3.341977000  |
| H | 4.386433000  | 0.130252000  | 3.807429000  |
| C | 2.108626000  | -4.367847000 | -1.787070000 |
| H | 1.434764000  | -5.249384000 | -1.769364000 |
| H | 3.093926000  | -4.629430000 | -1.355990000 |
| H | 2.236119000  | -4.055279000 | -2.846412000 |
| C | 2.848183000  | 2.995988000  | -2.086760000 |
| H | 3.343342000  | 3.958151000  | -1.835724000 |
| H | 2.836113000  | 2.913205000  | -3.193245000 |
| H | 3.478888000  | 2.176010000  | -1.692280000 |
| C | 0.578894000  | 4.105837000  | -2.113422000 |
| H | -0.451125000 | 4.126615000  | -1.706861000 |
| H | 0.510428000  | 4.020213000  | -3.218552000 |
| H | 1.047133000  | 5.086568000  | -1.883574000 |

|   |              |              |              |
|---|--------------|--------------|--------------|
| C | -3.675577000 | 1.461819000  | 0.335934000  |
| H | -4.189891000 | 0.639228000  | -0.207548000 |
| H | -3.581147000 | 1.124528000  | 1.389159000  |
| C | -3.367457000 | -2.171846000 | 2.681155000  |
| H | -3.127485000 | -2.014220000 | 3.755928000  |
| H | -4.334144000 | -1.647291000 | 2.499419000  |
| C | -4.736077000 | 3.221999000  | -1.168252000 |
| H | -5.319464000 | 4.168502000  | -1.186090000 |
| H | -5.336643000 | 2.473469000  | -1.734453000 |
| C | 3.425948000  | -1.823656000 | 3.900968000  |
| H | 3.978485000  | -2.138804000 | 4.800494000  |
| C | -3.381471000 | 3.410276000  | -1.872067000 |
| H | -2.834905000 | 4.258248000  | -1.396965000 |
| H | -3.535117000 | 3.696700000  | -2.935919000 |
| C | -3.547625000 | -3.668709000 | 2.381712000  |
| H | -2.627068000 | -4.216988000 | 2.690100000  |
| H | -4.379057000 | -4.088113000 | 2.990030000  |
| C | 3.137616000  | -0.304673000 | -3.577950000 |
| H | 2.830111000  | -0.257250000 | -4.634777000 |
| C | -4.552506000 | 2.725691000  | 0.275167000  |
| H | -5.541574000 | 2.525632000  | 0.742542000  |
| H | -4.078020000 | 3.530195000  | 0.884749000  |
| C | -3.791152000 | -3.898960000 | 0.881884000  |
| H | -4.771036000 | -3.450950000 | 0.595773000  |
| H | -3.872651000 | -4.986237000 | 0.663498000  |
| C | -1.622461000 | 2.041146000  | 3.456598000  |
| H | -1.438718000 | 2.944560000  | 4.076919000  |

|   |              |              |              |
|---|--------------|--------------|--------------|
| H | -2.298707000 | 1.371981000  | 4.029358000  |
| H | -2.155302000 | 2.368753000  | 2.543152000  |
| C | 4.887955000  | -0.404379000 | -1.893447000 |
| H | 5.955224000  | -0.436383000 | -1.622334000 |
| C | 4.503923000  | -0.322931000 | -3.242150000 |
| H | 5.269395000  | -0.285542000 | -4.033639000 |
| C | 0.401525000  | 0.903490000  | 4.439948000  |
| H | 1.359532000  | 0.381706000  | 4.255593000  |
| H | -0.256888000 | 0.214891000  | 5.009430000  |
| H | 0.605064000  | 1.773718000  | 5.099774000  |
| P | 1.162389000  | -0.651855000 | 0.004231000  |
| O | -0.407014000 | -3.538854000 | -2.092852000 |
| O | 1.589834000  | -3.305361000 | -0.987223000 |
| O | -1.089243000 | -0.658511000 | -2.995046000 |
| O | -3.167577000 | -1.294761000 | -2.380741000 |
| N | 0.157228000  | 0.784358000  | 0.199967000  |
| B | -1.213203000 | 0.510228000  | -0.219229000 |

110

Electronic Energy (BP86) = -2431.603515 a.u.

Zero-point correction (BP86) = 0.922081 a.u.

Thermal correction to Gibbs free Energy (BP86) = 0.835898 a.u.

Electronic Energy (M06) = -2433.4145794 a.u.

3

|   |              |              |              |
|---|--------------|--------------|--------------|
| C | 0.640078000  | -2.276495000 | 0.544910000  |
| C | -1.918693000 | -0.573293000 | -2.537866000 |
| H | -1.025400000 | 0.049680000  | -2.706462000 |
| C | 1.030531000  | -3.968574000 | 2.271610000  |

|   |              |              |              |
|---|--------------|--------------|--------------|
| H | 1.216299000  | -4.226443000 | 3.325760000  |
| C | -2.720449000 | -0.975109000 | -3.617288000 |
| H | -2.431569000 | -0.695137000 | -4.642770000 |
| C | 1.275143000  | 2.627001000  | 0.901354000  |
| H | 2.339378000  | 2.819994000  | 0.650368000  |
| C | -4.269608000 | -2.045803000 | -2.079269000 |
| H | -5.198816000 | -2.607329000 | -1.892466000 |
| C | 0.948732000  | -4.990293000 | 1.319643000  |
| H | 1.055023000  | -6.044658000 | 1.620921000  |
| C | 1.094733000  | -1.570074000 | 3.019666000  |
| H | 0.719379000  | -0.601051000 | 2.639419000  |
| C | -2.425647000 | -1.984908000 | 2.038202000  |
| H | -2.065757000 | -2.828809000 | 1.429845000  |
| C | 2.931091000  | -0.231535000 | -0.317107000 |
| H | 3.062147000  | -1.278645000 | 0.049963000  |
| C | 1.232533000  | 2.020731000  | 2.315163000  |
| H | 1.795001000  | 1.063858000  | 2.337369000  |
| H | 0.177263000  | 1.771529000  | 2.572129000  |
| C | 0.568536000  | 4.001595000  | 0.910988000  |
| H | -0.507470000 | 3.853797000  | 1.151772000  |
| H | 0.599466000  | 4.454738000  | -0.097905000 |
| C | -2.111035000 | -0.652793000 | 1.679831000  |
| C | -3.895848000 | -1.715083000 | -3.392297000 |
| H | -4.527952000 | -2.022184000 | -4.240815000 |
| C | -3.467833000 | -1.650305000 | -0.993320000 |
| H | -3.792586000 | -1.889126000 | 0.028979000  |
| C | -2.568099000 | 0.413310000  | 2.483633000  |

|   |              |              |              |
|---|--------------|--------------|--------------|
| H | -2.330080000 | 1.445242000  | 2.180882000  |
| C | 0.887012000  | -2.610827000 | 1.918449000  |
| C | 0.752989000  | -4.653212000 | -0.022596000 |
| H | 0.720646000  | -5.452276000 | -0.780192000 |
| C | -2.277875000 | -0.924318000 | -1.216048000 |
| C | -3.656896000 | -1.171253000 | 3.979740000  |
| H | -4.265324000 | -1.374222000 | 4.875493000  |
| C | -3.335283000 | 0.152495000  | 3.631803000  |
| H | -3.691784000 | 0.989870000  | 4.252303000  |
| C | 1.143535000  | 4.347514000  | 3.362722000  |
| H | 0.080806000  | 4.241733000  | 3.683054000  |
| H | 1.626228000  | 5.024612000  | 4.101453000  |
| C | 0.484107000  | -3.071073000 | -1.948210000 |
| H | 0.354567000  | -1.981763000 | -2.109063000 |
| C | 0.339585000  | -1.873204000 | 4.329097000  |
| H | 0.729643000  | -2.782999000 | 4.833040000  |
| H | -0.745374000 | -2.012345000 | 4.161148000  |
| H | 0.468936000  | -1.031396000 | 5.040795000  |
| C | -3.198990000 | -2.237977000 | 3.184935000  |
| H | -3.440085000 | -3.276786000 | 3.461043000  |
| C | 4.008093000  | 0.643018000  | 0.380418000  |
| H | 3.818215000  | 0.717516000  | 1.471783000  |
| H | 3.943153000  | 1.679428000  | -0.017843000 |
| C | 0.606574000  | -3.312334000 | -0.441878000 |
| C | 1.816585000  | 2.965748000  | 3.382724000  |
| H | 1.729903000  | 2.502331000  | 4.390373000  |
| H | 2.907620000  | 3.092375000  | 3.192490000  |

|   |              |              |              |
|---|--------------|--------------|--------------|
| C | 5.749669000  | -0.007713000 | -1.361430000 |
| H | 6.754898000  | -0.457638000 | -1.515368000 |
| H | 5.795309000  | 1.016200000  | -1.798734000 |
| C | 1.185299000  | 4.952888000  | 1.951043000  |
| H | 2.243316000  | 5.169659000  | 1.674743000  |
| H | 0.654977000  | 5.930127000  | 1.931943000  |
| C | 5.429772000  | 0.102578000  | 0.138506000  |
| H | 6.175428000  | 0.754386000  | 0.644293000  |
| H | 5.525675000  | -0.903006000 | 0.611280000  |
| C | 3.263633000  | -0.264690000 | -1.843835000 |
| H | 2.509994000  | -0.855139000 | -2.403875000 |
| H | 3.212071000  | 0.771214000  | -2.243539000 |
| C | 4.676117000  | -0.820122000 | -2.104689000 |
| H | 4.884827000  | -0.828148000 | -3.197356000 |
| H | 4.722158000  | -1.883183000 | -1.770795000 |
| C | 0.927157000  | 2.208672000  | -3.932021000 |
| H | 2.007366000  | 2.032281000  | -4.129163000 |
| H | 0.784057000  | 3.307538000  | -3.872777000 |
| C | -0.732194000 | -3.795210000 | -2.562138000 |
| H | -1.680483000 | -3.509104000 | -2.067185000 |
| H | -0.625875000 | -4.898146000 | -2.483318000 |
| H | -0.824944000 | -3.549920000 | -3.640305000 |
| C | 2.604253000  | -1.416672000 | 3.319368000  |
| H | 3.189701000  | -1.182909000 | 2.409189000  |
| H | 3.016269000  | -2.355980000 | 3.746585000  |
| H | 2.778306000  | -0.605991000 | 4.057953000  |
| C | 1.773461000  | -3.511116000 | -2.680022000 |

|   |              |              |              |
|---|--------------|--------------|--------------|
| H | 1.904349000  | -4.613132000 | -2.634802000 |
| H | 2.681145000  | -3.051007000 | -2.243113000 |
| H | 1.727220000  | -3.227140000 | -3.752645000 |
| C | -4.119976000 | 2.643587000  | -1.054131000 |
| H | -4.910833000 | 1.896791000  | -1.277730000 |
| H | -3.757714000 | 3.084101000  | -2.006573000 |
| C | -4.641324000 | 3.739996000  | -0.129704000 |
| H | -3.852855000 | 4.497324000  | 0.052789000  |
| H | -4.966384000 | 3.321139000  | 0.845310000  |
| H | -5.511756000 | 4.252682000  | -0.591641000 |
| B | 1.394963000  | 0.154673000  | -0.093075000 |
| C | 0.047578000  | 1.581019000  | -4.999645000 |
| H | -1.024391000 | 1.779552000  | -4.796799000 |
| H | 0.201104000  | 0.483701000  | -5.062313000 |
| H | 0.295425000  | 2.014823000  | -5.990303000 |
| P | -1.224911000 | -0.207972000 | 0.127248000  |
| N | 0.404550000  | -0.884469000 | 0.174118000  |
| O | -1.538546000 | 3.404040000  | -1.307749000 |
| O | 0.582282000  | 1.636151000  | -2.648566000 |
| O | -3.050051000 | 1.896686000  | -0.448666000 |
| O | 2.059932000  | 3.071237000  | -1.723838000 |
| C | -0.775960000 | 1.426931000  | -0.179586000 |
| C | 0.733249000  | 1.648660000  | -0.222392000 |
| C | 1.194863000  | 2.222808000  | -1.576551000 |
| C | -1.744492000 | 2.352098000  | -0.700154000 |

98

Electronic Energy (BP86) = -2274.599289 a.u.



Zero-point correction (BP86) = 0.813781 a.u.

Thermal correction to Gibbs free Energy (BP86) = 0.736859 a.u.

Electronic Energy (M06) = -2276.2548008 a.u.

4

|   |              |              |              |
|---|--------------|--------------|--------------|
| C | -0.154213000 | -2.482746000 | -2.266312000 |
| C | -2.047878000 | -0.094801000 | -2.447160000 |
| C | -0.320051000 | -1.493940000 | -1.236313000 |
| C | 1.270664000  | -3.170173000 | 1.190421000  |
| H | 0.461567000  | -3.530257000 | 0.535464000  |
| C | 1.818380000  | 2.496149000  | 0.745950000  |
| C | 0.963596000  | 1.444479000  | 1.204737000  |
| C | -1.948345000 | 2.010978000  | 0.042076000  |
| H | -1.402990000 | 2.591880000  | 0.825258000  |
| C | -1.572165000 | -0.632443000 | -1.089832000 |
| C | 1.756293000  | -1.856226000 | 1.016275000  |
| C | -2.795146000 | -1.367240000 | -0.407507000 |
| H | -3.661307000 | -0.679866000 | -0.513755000 |
| C | 0.794907000  | 1.224920000  | 2.612896000  |
| C | 2.485217000  | -0.544234000 | -1.481286000 |
| C | -3.198860000 | -2.689949000 | -1.097039000 |
| H | -2.355295000 | -3.411209000 | -1.022975000 |
| H | -3.366506000 | -2.521538000 | -2.177690000 |
| C | -2.576609000 | -1.619462000 | 1.094661000  |
| H | -2.341128000 | -0.665131000 | 1.610792000  |
| H | -1.682863000 | -2.272458000 | 1.223360000  |
| C | 2.179457000  | 0.015595000  | -2.743937000 |
| H | 1.134101000  | 0.268102000  | -2.984841000 |

|   |              |              |              |
|---|--------------|--------------|--------------|
| C | 2.525783000  | 3.258613000  | 1.701279000  |
| H | 3.188455000  | 4.065866000  | 1.351338000  |
| C | 1.973770000  | 2.906087000  | -0.720391000 |
| H | 1.379910000  | 2.200414000  | -1.335850000 |
| C | -1.959215000 | 2.914429000  | -1.234266000 |
| H | -0.936656000 | 3.034940000  | -1.646728000 |
| H | -2.557431000 | 2.412460000  | -2.024773000 |
| C | 2.396612000  | 3.026550000  | 3.073618000  |
| H | 2.961821000  | 3.634432000  | 3.798023000  |
| C | 1.835619000  | -4.008311000 | 2.166667000  |
| H | 1.452981000  | -5.033409000 | 2.293137000  |
| C | -0.198820000 | 0.223083000  | 3.203269000  |
| H | -0.501019000 | -0.467531000 | 2.393212000  |
| C | 1.523674000  | 2.026748000  | 3.515492000  |
| H | 1.396701000  | 1.859557000  | 4.596371000  |
| C | 3.810908000  | -0.944216000 | -1.205776000 |
| H | 4.061434000  | -1.428773000 | -0.251952000 |
| C | 2.814368000  | -1.388527000 | 1.831842000  |
| H | 3.200041000  | -0.363655000 | 1.719685000  |
| H | -1.471217000 | 0.693949000  | -4.048028000 |
| C | 3.378223000  | -2.234796000 | 2.802654000  |
| H | 4.200060000  | -1.864724000 | 3.435992000  |
| H | 1.090617000  | -3.736015000 | -2.949836000 |
| C | 3.438694000  | 2.844138000  | -1.199528000 |
| H | 4.073105000  | 3.573522000  | -0.652143000 |
| H | 3.502870000  | 3.097164000  | -2.278028000 |
| H | 3.880232000  | 1.838233000  | -1.061475000 |

|   |              |              |              |
|---|--------------|--------------|--------------|
| C | 1.413164000  | 4.329090000  | -0.950815000 |
| H | 0.377456000  | 4.437230000  | -0.573905000 |
| H | 1.411672000  | 4.575704000  | -2.033562000 |
| H | 2.034986000  | 5.093330000  | -0.437813000 |
| C | -3.417270000 | 1.858211000  | 0.523299000  |
| H | -4.005524000 | 1.345258000  | -0.268786000 |
| H | -3.481267000 | 1.211920000  | 1.423778000  |
| C | -3.797229000 | -2.268653000 | 1.771648000  |
| H | -3.579744000 | -2.466210000 | 2.844575000  |
| H | -4.645519000 | -1.545651000 | 1.754516000  |
| C | -4.018578000 | 4.153870000  | -0.402712000 |
| H | -4.437520000 | 5.152625000  | -0.150723000 |
| H | -4.671201000 | 3.733695000  | -1.202122000 |
| C | 2.892555000  | -3.544665000 | 2.969203000  |
| H | 3.340214000  | -4.205124000 | 3.728869000  |
| C | -2.587514000 | 4.291284000  | -0.948490000 |
| H | -1.960510000 | 4.836356000  | -0.204652000 |
| H | -2.583335000 | 4.909860000  | -1.873023000 |
| C | -4.228817000 | -3.561164000 | 1.059824000  |
| H | -3.434786000 | -4.332891000 | 1.190435000  |
| H | -5.147414000 | -3.975647000 | 1.530497000  |
| C | 3.193159000  | 0.203415000  | -3.696096000 |
| H | 2.943979000  | 0.638348000  | -4.677114000 |
| C | -4.064874000 | 3.223596000  | 0.820350000  |
| H | -5.115331000 | 3.081084000  | 1.156295000  |
| H | -3.529528000 | 3.706203000  | 1.671454000  |
| C | -4.444442000 | -3.311861000 | -0.441683000 |

|   |              |              |              |
|---|--------------|--------------|--------------|
| H | -5.316869000 | -2.631761000 | -0.580577000 |
| H | -4.708808000 | -4.260699000 | -0.957735000 |
| C | -1.462006000 | 0.964203000  | 3.699159000  |
| H | -1.213390000 | 1.638950000  | 4.546123000  |
| H | -2.227000000 | 0.242846000  | 4.055850000  |
| H | -1.919686000 | 1.584851000  | 2.904984000  |
| C | 4.820727000  | -0.758155000 | -2.166824000 |
| H | 5.850033000  | -1.080245000 | -1.942535000 |
| C | 4.516376000  | -0.179953000 | -3.410293000 |
| H | 5.308305000  | -0.040919000 | -4.163571000 |
| C | 0.373700000  | -0.638580000 | 4.346608000  |
| H | 1.295285000  | -1.170700000 | 4.043414000  |
| H | -0.373839000 | -1.399429000 | 4.653325000  |
| H | 0.605790000  | -0.033687000 | 5.249032000  |
| P | 1.041226000  | -0.882192000 | -0.374668000 |
| O | -0.921856000 | -2.741357000 | -3.196057000 |
| O | 1.045794000  | -3.184320000 | -2.139762000 |
| O | -1.028171000 | 0.392583000  | -3.224058000 |
| O | -3.205049000 | -0.002611000 | -2.821130000 |
| N | 0.276064000  | 0.575868000  | 0.253887000  |
| B | -1.100680000 | 0.678824000  | -0.220947000 |

104

Electronic Energy (BP86) = -2352.991668 a.u.

Zero-point correction (BP86) = 0.864043 a.u.

Thermal correction to Gibbs free Energy (BP86) = 0.779605 a.u.

Electronic Energy (M06) = -2354.716143 a.u.

2INT1

|   |              |              |              |
|---|--------------|--------------|--------------|
| C | 3.279487000  | 0.277579000  | 1.249292000  |
| C | 2.214935000  | 0.158600000  | 0.202650000  |
| C | 2.239875000  | -2.484630000 | -1.390409000 |
| H | 2.951228000  | -1.647017000 | -1.452272000 |
| C | -2.732030000 | -1.642072000 | -0.443726000 |
| C | -1.654601000 | -0.886518000 | -1.007718000 |
| C | -0.290257000 | 2.535074000  | 0.773860000  |
| H | -1.058409000 | 3.305176000  | 1.025143000  |
| C | 2.325734000  | 0.620389000  | -1.063316000 |
| C | 1.027321000  | -2.369196000 | -0.670177000 |
| C | -2.716629000 | 1.773230000  | -0.138512000 |
| H | -3.271651000 | 0.949470000  | -0.638972000 |
| C | -1.405100000 | -0.929048000 | -2.416920000 |
| C | 0.379007000  | -1.545573000 | 2.039451000  |
| C | -3.436159000 | 2.053603000  | 1.220349000  |
| H | -2.892663000 | 2.861052000  | 1.762451000  |
| H | -3.393697000 | 1.162918000  | 1.883741000  |
| C | -2.874252000 | 3.028823000  | -1.042179000 |
| H | -2.414253000 | 2.849212000  | -2.035855000 |
| H | -2.317876000 | 3.884763000  | -0.597046000 |
| C | -0.386279000 | -0.822928000 | 2.978666000  |
| H | -0.867817000 | 0.121217000  | 2.687950000  |
| C | -3.524559000 | -2.429726000 | -1.307321000 |
| H | -4.354369000 | -3.015239000 | -0.880700000 |
| C | -3.123983000 | -1.646888000 | 1.038970000  |
| H | -2.516635000 | -0.873873000 | 1.548855000  |
| C | 0.527640000  | 2.400167000  | 2.084814000  |

|   |              |              |              |
|---|--------------|--------------|--------------|
| H | -0.148348000 | 2.093838000  | 2.913515000  |
| H | 1.291485000  | 1.601460000  | 2.007737000  |
| C | -3.293495000 | -2.475835000 | -2.685699000 |
| H | -3.932057000 | -3.093543000 | -3.337339000 |
| C | 2.543206000  | -3.677906000 | -2.070879000 |
| H | 3.492053000  | -3.747100000 | -2.625315000 |
| C | -0.277107000 | -0.160078000 | -3.105513000 |
| H | 0.463062000  | 0.158432000  | -2.336535000 |
| C | -2.245417000 | -1.724509000 | -3.225325000 |
| H | -2.060201000 | -1.754937000 | -4.310090000 |
| C | 1.000963000  | -2.750754000 | 2.442790000  |
| H | 1.615211000  | -3.322110000 | 1.731469000  |
| C | 0.134363000  | -3.467853000 | -0.649428000 |
| H | -0.809852000 | -3.408779000 | -0.093094000 |
| C | 0.441006000  | -4.649311000 | -1.340800000 |
| H | -0.272447000 | -5.487916000 | -1.320053000 |
| C | -2.838399000 | -2.999329000 | 1.728625000  |
| H | -1.760221000 | -3.252116000 | 1.738253000  |
| H | -3.383074000 | -3.826535000 | 1.225462000  |
| H | -3.174921000 | -2.971131000 | 2.786031000  |
| C | -4.612929000 | -1.284438000 | 1.237886000  |
| H | -4.897650000 | -0.370696000 | 0.681559000  |
| H | -4.829589000 | -1.113586000 | 2.313480000  |
| H | -5.281296000 | -2.103383000 | 0.898265000  |
| C | 0.539646000  | 3.197055000  | -0.372532000 |
| H | 1.306759000  | 2.489098000  | -0.750932000 |
| H | -0.118013000 | 3.405109000  | -1.243357000 |

|   |              |              |              |
|---|--------------|--------------|--------------|
| C | -4.343285000 | 3.447247000  | -1.230282000 |
| H | -4.399907000 | 4.347597000  | -1.880526000 |
| H | -4.890679000 | 2.639084000  | -1.768475000 |
| C | 2.085607000  | 4.274139000  | 1.332207000  |
| H | 2.576297000  | 5.222297000  | 1.643461000  |
| H | 2.901873000  | 3.554224000  | 1.098182000  |
| C | 1.649421000  | -4.760183000 | -2.051716000 |
| H | 1.891662000  | -5.690389000 | -2.590235000 |
| C | 1.224076000  | 3.717746000  | 2.476787000  |
| H | 0.449264000  | 4.473042000  | 2.749094000  |
| H | 1.837716000  | 3.560314000  | 3.391065000  |
| C | -5.028943000 | 3.713871000  | 0.118549000  |
| H | -4.550861000 | 4.596161000  | 0.604149000  |
| H | -6.098255000 | 3.980964000  | -0.028403000 |
| C | -0.540202000 | -1.298984000 | 4.291095000  |
| H | -1.144710000 | -0.724254000 | 5.010411000  |
| C | 1.232821000  | 4.494945000  | 0.073535000  |
| H | 1.859952000  | 4.879516000  | -0.759053000 |
| H | 0.465404000  | 5.277928000  | 0.283171000  |
| C | -4.902686000 | 2.494630000  | 1.044429000  |
| H | -5.493935000 | 1.654023000  | 0.614102000  |
| H | -5.352311000 | 2.710594000  | 2.038766000  |
| C | -0.800625000 | 1.117208000  | -3.794428000 |
| H | -1.539461000 | 0.875882000  | -4.589695000 |
| H | 0.038882000  | 1.671635000  | -4.263629000 |
| H | -1.293754000 | 1.802488000  | -3.077634000 |
| C | 0.841740000  | -3.225428000 | 3.754265000  |

|   |              |              |              |
|---|--------------|--------------|--------------|
| H | 1.324829000  | -4.169683000 | 4.051774000  |
| C | 0.070643000  | -2.502750000 | 4.682575000  |
| H | -0.055048000 | -2.878784000 | 5.710294000  |
| C | 0.495398000  | -1.019243000 | -4.129105000 |
| H | 0.786365000  | -2.002222000 | -3.709255000 |
| H | 1.426240000  | -0.493916000 | -4.427103000 |
| H | -0.089547000 | -1.203550000 | -5.056481000 |
| P | 0.707068000  | -0.864620000 | 0.356546000  |
| O | 4.295099000  | 0.937838000  | 1.107356000  |
| N | -0.778349000 | -0.046863000 | -0.161642000 |
| B | -1.182955000 | 1.337777000  | 0.160951000  |
| O | 3.007725000  | -0.419438000 | 2.391062000  |
| C | 3.999466000  | -0.325296000 | 3.425633000  |
| H | 4.129514000  | 0.726771000  | 3.752072000  |
| H | 3.626239000  | -0.945651000 | 4.260833000  |
| H | 4.979584000  | -0.702140000 | 3.068173000  |
| C | 3.519392000  | 1.091981000  | -1.716095000 |
| O | 4.325950000  | 0.303309000  | -2.223212000 |
| O | 3.609400000  | 2.448750000  | -1.869447000 |
| C | 4.751012000  | 2.899475000  | -2.608443000 |
| H | 4.784123000  | 2.441821000  | -3.619285000 |
| H | 4.648006000  | 3.997828000  | -2.689448000 |
| H | 5.694610000  | 2.645685000  | -2.081605000 |

110

Electronic Energy (BP86) = -2431.512422 a.u.

Zero-point correction (BP86) = 0.918665 a.u.

Thermal correction to Gibbs free Energy (BP86) = 0.829023 a.u.



Electronic Energy (M06) = -2433.314391 a.u.

3INT1

|   |              |              |              |
|---|--------------|--------------|--------------|
| 6 | -2.975285000 | -0.254331000 | -1.443495000 |
| 6 | -1.945745000 | 0.056859000  | -0.400220000 |
| 6 | -2.091992000 | -2.103312000 | 1.784813000  |
| 1 | -2.790630000 | -1.277433000 | 1.579923000  |
| 6 | 2.892936000  | -1.495471000 | 0.997895000  |
| 6 | 1.806766000  | -0.607193000 | 1.281337000  |
| 6 | 0.559483000  | 2.289291000  | -1.333443000 |
| 1 | 1.352110000  | 2.964514000  | -1.736052000 |
| 6 | -2.146112000 | 0.886450000  | 0.649178000  |
| 6 | -0.834230000 | -2.174583000 | 1.140173000  |
| 6 | 2.956861000  | 1.727355000  | -0.229100000 |
| 1 | 3.490948000  | 1.047989000  | 0.471103000  |
| 6 | 1.471531000  | -0.285909000 | 2.635247000  |
| 6 | -0.008585000 | -1.980937000 | -1.662967000 |
| 6 | 3.674371000  | 1.623451000  | -1.614607000 |
| 1 | 3.130505000  | 2.254675000  | -2.353690000 |
| 1 | 3.623213000  | 0.585302000  | -2.008352000 |
| 6 | 3.143611000  | 3.169014000  | 0.321019000  |
| 1 | 2.699942000  | 3.252522000  | 1.335147000  |
| 1 | 2.586787000  | 3.891258000  | -0.317978000 |
| 6 | 0.793231000  | -1.447310000 | -2.694513000 |
| 1 | 1.228938000  | -0.442854000 | -2.593466000 |
| 6 | 3.600362000  | -2.057709000 | 2.083081000  |
| 1 | 4.437672000  | -2.742390000 | 1.874231000  |
| 6 | 3.386835000  | -1.862087000 | -0.407532000 |

|   |              |              |              |
|---|--------------|--------------|--------------|
| 1 | 2.819698000  | -1.246422000 | -1.132199000 |
| 6 | -0.261766000 | 1.904676000  | -2.592531000 |
| 1 | 0.382001000  | 1.355899000  | -3.314343000 |
| 1 | -1.097331000 | 1.226023000  | -2.333076000 |
| 6 | 3.275597000  | -1.760141000 | 3.410397000  |
| 1 | 3.845834000  | -2.211644000 | 4.237985000  |
| 6 | -2.456816000 | -3.086888000 | 2.721573000  |
| 1 | -3.438923000 | -3.014947000 | 3.214423000  |
| 6 | 0.351522000  | 0.679119000  | 3.028600000  |
| 1 | -0.314405000 | 0.837028000  | 2.150918000  |
| 6 | 2.225379000  | -0.875365000 | 3.672711000  |
| 1 | 1.971152000  | -0.631270000 | 4.715661000  |
| 6 | -0.559424000 | -3.274666000 | -1.821853000 |
| 1 | -1.201196000 | -3.699491000 | -1.037126000 |
| 6 | 0.038364000  | -3.246039000 | 1.447666000  |
| 1 | 1.016584000  | -3.327733000 | 0.956566000  |
| 6 | -0.332297000 | -4.217250000 | 2.389832000  |
| 1 | 0.364061000  | -5.037869000 | 2.623127000  |
| 6 | 3.147624000  | -3.344664000 | -0.768944000 |
| 1 | 2.072413000  | -3.607667000 | -0.797696000 |
| 1 | 3.649917000  | -4.021276000 | -0.045015000 |
| 1 | 3.561996000  | -3.565045000 | -1.774925000 |
| 6 | 4.887593000  | -1.537741000 | -0.580074000 |
| 1 | 5.130694000  | -0.509883000 | -0.248779000 |
| 1 | 5.185986000  | -1.636709000 | -1.645048000 |
| 1 | 5.524391000  | -2.235829000 | 0.003056000  |
| 6 | -0.272427000 | 3.205704000  | -0.380191000 |

|   |              |              |              |
|---|--------------|--------------|--------------|
| 1 | -1.088610000 | 2.612073000  | 0.087743000  |
| 1 | 0.355455000  | 3.555985000  | 0.467172000  |
| 6 | 4.620008000  | 3.604051000  | 0.370869000  |
| 1 | 4.694547000  | 4.641198000  | 0.764980000  |
| 1 | 5.172796000  | 2.956846000  | 1.090669000  |
| 6 | -1.705629000 | 3.983374000  | -2.331120000 |
| 1 | -2.121198000 | 4.871979000  | -2.855224000 |
| 1 | -2.572700000 | 3.375823000  | -1.988767000 |
| 6 | -1.582761000 | -4.141841000 | 3.028955000  |
| 1 | -1.874081000 | -4.906824000 | 3.766451000  |
| 6 | -0.851351000 | 3.143627000  | -3.293346000 |
| 1 | -0.019500000 | 3.772123000  | -3.692033000 |
| 1 | -1.452881000 | 2.824801000  | -4.172542000 |
| 6 | 5.283561000  | 3.504803000  | -1.011336000 |
| 1 | 4.796653000  | 4.229098000  | -1.704922000 |
| 1 | 6.354589000  | 3.798388000  | -0.955980000 |
| 6 | 1.047893000  | -2.192011000 | -3.858612000 |
| 1 | 1.676657000  | -1.760115000 | -4.652974000 |
| 6 | -0.880894000 | 4.415463000  | -1.108894000 |
| 1 | -1.512659000 | 4.989970000  | -0.397705000 |
| 1 | -0.066222000 | 5.104091000  | -1.437728000 |
| 6 | 5.144511000  | 2.085048000  | -1.579066000 |
| 1 | 5.739348000  | 1.385396000  | -0.948847000 |
| 1 | 5.580664000  | 2.026704000  | -2.600763000 |
| 6 | 0.922419000  | 2.055577000  | 3.431982000  |
| 1 | 1.580569000  | 1.976388000  | 4.324752000  |
| 1 | 0.097877000  | 2.757520000  | 3.676479000  |

|    |              |              |              |
|----|--------------|--------------|--------------|
| 1  | 1.520609000  | 2.511041000  | 2.618331000  |
| 6  | -0.296715000 | -4.018157000 | -2.982953000 |
| 1  | -0.723777000 | -5.028097000 | -3.088700000 |
| 6  | 0.506624000  | -3.480277000 | -4.005061000 |
| 1  | 0.710671000  | -4.066298000 | -4.915160000 |
| 6  | -0.539921000 | 0.134661000  | 4.164551000  |
| 1  | -0.901105000 | -0.891177000 | 3.952819000  |
| 1  | -1.430771000 | 0.785381000  | 4.282166000  |
| 1  | -0.014122000 | 0.117523000  | 5.143886000  |
| 15 | -0.444581000 | -0.957587000 | -0.191498000 |
| 8  | -3.765815000 | 0.558378000  | -1.893455000 |
| 7  | 0.992575000  | -0.010837000 | 0.200867000  |
| 5  | 1.418459000  | 1.254497000  | -0.438248000 |
| 8  | -2.975661000 | -1.576943000 | -1.790409000 |
| 6  | -3.957599000 | -1.993219000 | -2.773750000 |
| 1  | -4.105101000 | -1.164451000 | -3.496254000 |
| 1  | -3.486383000 | -2.852210000 | -3.293602000 |
| 6  | -3.410881000 | 1.460873000  | 1.033642000  |
| 8  | -4.273397000 | 0.784844000  | 1.611189000  |
| 8  | -3.523331000 | 2.812934000  | 0.840456000  |
| 6  | -4.740251000 | 3.424809000  | 1.321996000  |
| 1  | -5.581336000 | 2.714266000  | 1.184534000  |
| 1  | -4.897127000 | 4.300707000  | 0.659932000  |
| 6  | -5.275008000 | -2.383858000 | -2.115312000 |
| 1  | -5.985629000 | -2.755536000 | -2.883049000 |
| 1  | -5.126294000 | -3.186215000 | -1.364062000 |
| 1  | -5.735105000 | -1.509761000 | -1.613462000 |

|   |              |             |             |
|---|--------------|-------------|-------------|
| 6 | -4.624564000 | 3.846228000 | 2.783333000 |
| 1 | -5.542746000 | 4.384677000 | 3.100618000 |
| 1 | -4.504972000 | 2.957671000 | 3.434796000 |
| 1 | -3.757433000 | 4.520943000 | 2.937874000 |

98

Electronic Energy (BP86) = -2274.507286 a.u.

Zero-point correction (BP86) = 0.810412 a.u.

Thermal correction to Gibbs free Energy (BP86) = 0.730646 a.u.

Electronic Energy (M06) = -2276.156187 a.u.

4INT1

|   |              |              |              |
|---|--------------|--------------|--------------|
| 6 | 2.870367000  | 2.001621000  | 1.257129000  |
| 6 | 2.041714000  | 1.316334000  | 0.217811000  |
| 6 | 3.347069000  | -1.158663000 | -1.080172000 |
| 1 | 3.603644000  | -0.098710000 | -1.229188000 |
| 6 | -1.503972000 | -2.594969000 | -0.246055000 |
| 6 | -0.863511000 | -1.489828000 | -0.892650000 |
| 6 | -1.299200000 | 2.341777000  | 0.471090000  |
| 1 | -2.344469000 | 2.704609000  | 0.621141000  |
| 6 | 2.012584000  | 1.661237000  | -1.090196000 |
| 6 | 2.174576000  | -1.540923000 | -0.386572000 |
| 6 | -3.065743000 | 0.458951000  | -0.325804000 |
| 1 | -3.160455000 | -0.575709000 | -0.722424000 |
| 6 | -0.546691000 | -1.554949000 | -2.287327000 |
| 6 | 1.080647000  | -0.842841000 | 2.212607000  |
| 6 | -3.892964000 | 0.523764000  | 0.998541000  |
| 1 | -3.795909000 | 1.541564000  | 1.441594000  |
| 1 | -3.479946000 | -0.175907000 | 1.757004000  |

|   |              |              |              |
|---|--------------|--------------|--------------|
| 6 | -3.736157000 | 1.397226000  | -1.368788000 |
| 1 | -3.203244000 | 1.338123000  | -2.340390000 |
| 1 | -3.647016000 | 2.455711000  | -1.034684000 |
| 6 | 0.030128000  | -0.448985000 | 3.067942000  |
| 1 | -0.806221000 | 0.148317000  | 2.677865000  |
| 6 | -1.798341000 | -3.743227000 | -1.013612000 |
| 1 | -2.291180000 | -4.598463000 | -0.524805000 |
| 6 | -1.934675000 | -2.625998000 | 1.225919000  |
| 1 | -1.776012000 | -1.612059000 | 1.641789000  |
| 6 | -0.584182000 | 2.740594000  | 1.788419000  |
| 1 | -1.094960000 | 2.257427000  | 2.650592000  |
| 1 | 0.459744000  | 2.371895000  | 1.810084000  |
| 6 | -1.496200000 | -3.817853000 | -2.376938000 |
| 1 | -1.743024000 | -4.723801000 | -2.953368000 |
| 6 | 4.197599000  | -2.141246000 | -1.618675000 |
| 1 | 5.105188000  | -1.822838000 | -2.154713000 |
| 6 | 0.135611000  | -0.425734000 | -3.060852000 |
| 1 | 0.600774000  | 0.278130000  | -2.335129000 |
| 6 | -0.882947000 | -2.726605000 | -2.999047000 |
| 1 | -0.646421000 | -2.779531000 | -4.072848000 |
| 6 | 2.155943000  | -1.592234000 | 2.744786000  |
| 1 | 2.995169000  | -1.890337000 | 2.099487000  |
| 6 | 1.876687000  | -2.918135000 | -0.247061000 |
| 1 | 0.977585000  | -3.242117000 | 0.292695000  |
| 6 | 2.725939000  | -3.889729000 | -0.797167000 |
| 1 | 2.471275000  | -4.955332000 | -0.686062000 |
| 6 | -1.105416000 | -3.617111000 | 2.072425000  |

|   |              |              |              |
|---|--------------|--------------|--------------|
| 1 | -0.032953000 | -3.344807000 | 2.117498000  |
| 1 | -1.183822000 | -4.649228000 | 1.669087000  |
| 1 | -1.479240000 | -3.637346000 | 3.117419000  |
| 6 | -3.433744000 | -2.969911000 | 1.374518000  |
| 1 | -4.071340000 | -2.351547000 | 0.713791000  |
| 1 | -3.765620000 | -2.809605000 | 2.421962000  |
| 1 | -3.632695000 | -4.034375000 | 1.130109000  |
| 6 | -0.783299000 | 3.168318000  | -0.749407000 |
| 1 | 0.237986000  | 2.832810000  | -1.029536000 |
| 1 | -1.410902000 | 2.959141000  | -1.641944000 |
| 6 | -5.226202000 | 1.078422000  | -1.586377000 |
| 1 | -5.656249000 | 1.777622000  | -2.336566000 |
| 1 | -5.325204000 | 0.056645000  | -2.020762000 |
| 6 | 0.015149000  | 5.016429000  | 0.805483000  |
| 1 | 0.005563000  | 6.112731000  | 0.991502000  |
| 1 | 1.081726000  | 4.726920000  | 0.672286000  |
| 6 | 3.892291000  | -3.504682000 | -1.482412000 |
| 1 | 4.560799000  | -4.269016000 | -1.909968000 |
| 6 | -0.575636000 | 4.265680000  | 2.009164000  |
| 1 | -1.621684000 | 4.614991000  | 2.178869000  |
| 1 | -0.013555000 | 4.507101000  | 2.938140000  |
| 6 | -6.015832000 | 1.149988000  | -0.270452000 |
| 1 | -6.008855000 | 2.200117000  | 0.103653000  |
| 1 | -7.083010000 | 0.885128000  | -0.435486000 |
| 6 | 0.042400000  | -0.811201000 | 4.424655000  |
| 1 | -0.787462000 | -0.499235000 | 5.078179000  |
| 6 | -0.762197000 | 4.681538000  | -0.476708000 |

|    |              |              |              |
|----|--------------|--------------|--------------|
| 1  | -0.313847000 | 5.202785000  | -1.349325000 |
| 1  | -1.808061000 | 5.059156000  | -0.380810000 |
| 6  | -5.391812000 | 0.229795000  | 0.789671000  |
| 1  | -5.521144000 | -0.828992000 | 0.468062000  |
| 1  | -5.931519000 | 0.325775000  | 1.757638000  |
| 6  | -0.879880000 | 0.382337000  | -3.895942000 |
| 1  | -1.379287000 | -0.255935000 | -4.657216000 |
| 1  | -0.366026000 | 1.210335000  | -4.427614000 |
| 1  | -1.671802000 | 0.831194000  | -3.264934000 |
| 6  | 2.162537000  | -1.955624000 | 4.100604000  |
| 1  | 3.002524000  | -2.545756000 | 4.499990000  |
| 6  | 1.106217000  | -1.568761000 | 4.944347000  |
| 1  | 1.112582000  | -1.857352000 | 6.007377000  |
| 6  | 1.273430000  | -0.927747000 | -3.975182000 |
| 1  | 1.962084000  | -1.612525000 | -3.442126000 |
| 1  | 1.870523000  | -0.063535000 | -4.332799000 |
| 1  | 0.891695000  | -1.457812000 | -4.874610000 |
| 15 | 1.149291000  | -0.258464000 | 0.463864000  |
| 8  | 3.498326000  | 3.027337000  | 1.053503000  |
| 7  | -0.512025000 | -0.261254000 | -0.147204000 |
| 5  | -1.520347000 | 0.809788000  | 0.014092000  |
| 8  | 2.868968000  | 1.391240000  | 2.480206000  |
| 6  | 2.893617000  | 2.560221000  | -1.782534000 |
| 8  | 3.998099000  | 2.183802000  | -2.196611000 |
| 8  | 2.384464000  | 3.789046000  | -2.098213000 |
| 1  | 3.435624000  | 1.958011000  | 3.049766000  |
| 1  | 3.090927000  | 4.217369000  | -2.630473000 |



Electronic Energy (BP86) = -2353.034583 a.u.

Zero-point correction (BP86) = 0.865368 a.u.

Thermal correction to Gibbs free Energy (BP86) = 0.781834 a.u.

Electronic Energy (M06) = -2354.756707 a.u.

2CY1

|   |              |              |              |
|---|--------------|--------------|--------------|
| C | 1.310487000  | -2.236135000 | -2.263114000 |
| C | -1.605942000 | -1.850125000 | -2.417717000 |
| C | 0.578221000  | -1.285446000 | -1.396498000 |
| C | 2.069871000  | -2.348529000 | 1.434483000  |
| H | 1.136451000  | -2.802410000 | 1.074221000  |
| C | -0.448830000 | 2.920860000  | -0.291113000 |
| C | -0.151157000 | 1.934213000  | 0.718355000  |
| C | -2.777284000 | 0.485519000  | -0.126503000 |
| H | -2.492970000 | 1.429817000  | -0.626507000 |
| C | -0.797384000 | -1.180069000 | -1.338274000 |
| C | 2.444129000  | -1.062100000 | 0.988989000  |
| C | -1.787996000 | -1.765855000 | 1.058322000  |
| H | -2.902090000 | -1.716223000 | 1.055899000  |
| C | 0.098048000  | 2.369056000  | 2.063443000  |
| C | 2.486995000  | 1.066919000  | -0.942856000 |
| C | -1.488751000 | -3.239804000 | 0.683105000  |
| H | -0.392204000 | -3.424054000 | 0.612370000  |
| H | -1.885012000 | -3.467152000 | -0.324707000 |
| C | -1.353020000 | -1.500326000 | 2.515476000  |
| H | -1.623204000 | -0.470638000 | 2.815770000  |
| H | -0.243143000 | -1.559385000 | 2.591353000  |

|   |              |              |              |
|---|--------------|--------------|--------------|
| C | 3.044438000  | 0.836063000  | -2.220137000 |
| H | 2.752176000  | -0.047991000 | -2.800330000 |
| C | -0.528504000 | 4.277222000  | 0.094064000  |
| H | -0.765798000 | 5.031514000  | -0.672779000 |
| C | -0.657825000 | 2.639108000  | -1.791387000 |
| H | -0.645059000 | 1.540012000  | -1.943794000 |
| C | -3.879088000 | -0.149176000 | -1.013880000 |
| H | -3.486518000 | -0.306006000 | -2.039647000 |
| H | -4.143460000 | -1.161472000 | -0.629774000 |
| C | -0.304867000 | 4.697114000  | 1.408973000  |
| H | -0.373756000 | 5.764234000  | 1.674386000  |
| C | 2.885942000  | -3.066900000 | 2.322139000  |
| H | 2.573066000  | -4.069239000 | 2.654629000  |
| C | 0.482771000  | 1.417327000  | 3.198011000  |
| H | 0.470782000  | 0.392097000  | 2.781809000  |
| C | 0.015377000  | 3.741773000  | 2.378081000  |
| H | 0.205746000  | 4.064717000  | 3.414517000  |
| C | 2.881953000  | 2.217523000  | -0.217721000 |
| H | 2.447648000  | 2.434383000  | 0.768618000  |
| C | 3.673416000  | -0.521913000 | 1.432909000  |
| H | 4.015930000  | 0.457519000  | 1.070004000  |
| C | -2.230680000 | -1.629828000 | -4.683776000 |
| H | -3.304788000 | -1.776596000 | -4.449241000 |
| H | -1.793619000 | -2.604118000 | -4.982884000 |
| H | -2.108753000 | -0.886813000 | -5.492965000 |
| C | 4.488397000  | -1.242516000 | 2.322896000  |
| H | 5.442429000  | -0.805222000 | 2.657503000  |

|   |              |              |              |
|---|--------------|--------------|--------------|
| C | 3.432913000  | -3.219598000 | -2.681244000 |
| H | 3.411311000  | -3.003155000 | -3.769184000 |
| H | 3.047103000  | -4.247384000 | -2.524148000 |
| H | 4.461935000  | -3.129548000 | -2.288538000 |
| C | 0.457083000  | 3.265264000  | -2.662805000 |
| H | 0.424514000  | 4.374288000  | -2.607981000 |
| H | 0.309555000  | 2.983818000  | -3.726880000 |
| H | 1.470155000  | 2.947907000  | -2.364731000 |
| C | -2.004973000 | 3.185449000  | -2.326792000 |
| H | -2.874538000 | 2.864355000  | -1.722836000 |
| H | -2.167030000 | 2.836028000  | -3.367805000 |
| H | -2.005727000 | 4.295770000  | -2.351182000 |
| C | -3.382103000 | 0.911630000  | 1.237692000  |
| H | -3.662216000 | 0.008057000  | 1.825645000  |
| H | -2.621758000 | 1.451927000  | 1.840882000  |
| C | -1.965593000 | -2.498905000 | 3.518183000  |
| H | -1.607549000 | -2.274983000 | 4.548142000  |
| H | -3.071928000 | -2.361325000 | 3.537327000  |
| C | -5.720073000 | 1.085376000  | 0.263949000  |
| H | -6.621443000 | 1.728669000  | 0.156553000  |
| H | -6.054229000 | 0.165786000  | 0.798856000  |
| C | 4.096025000  | -2.513570000 | 2.775075000  |
| H | 4.738184000  | -3.077170000 | 3.470418000  |
| C | -5.165131000 | 0.697800000  | -1.114565000 |
| H | -4.946211000 | 1.630057000  | -1.685786000 |
| H | -5.933198000 | 0.151067000  | -1.705818000 |
| C | -1.648340000 | -3.952563000 | 3.138432000  |

|   |              |              |              |
|---|--------------|--------------|--------------|
| H | -0.550076000 | -4.124037000 | 3.234824000  |
| H | -2.134474000 | -4.659924000 | 3.846497000  |
| C | 3.984119000  | 1.732650000  | -2.756865000 |
| H | 4.407252000  | 1.539773000  | -3.755230000 |
| C | -4.640685000 | 1.789140000  | 1.099878000  |
| H | -5.036270000 | 2.052011000  | 2.106260000  |
| H | -4.370866000 | 2.754901000  | 0.612211000  |
| C | -2.084608000 | -4.240597000 | 1.693792000  |
| H | -3.196804000 | -4.184579000 | 1.636588000  |
| H | -1.816644000 | -5.280731000 | 1.402735000  |
| C | -0.529669000 | 1.470576000  | 4.363292000  |
| H | -0.497281000 | 2.450207000  | 4.886432000  |
| H | -0.300656000 | 0.685838000  | 5.114680000  |
| H | -1.570021000 | 1.314509000  | 4.014032000  |
| C | 3.821000000  | 3.109867000  | -0.761899000 |
| H | 4.112535000  | 4.003292000  | -0.187941000 |
| C | 4.377927000  | 2.868469000  | -2.029442000 |
| H | 5.114572000  | 3.569445000  | -2.452908000 |
| C | 1.905110000  | 1.697395000  | 3.730148000  |
| H | 2.670295000  | 1.630030000  | 2.930683000  |
| H | 2.180732000  | 0.958644000  | 4.512088000  |
| H | 1.980454000  | 2.709022000  | 4.183691000  |
| P | 1.334137000  | -0.156121000 | -0.191894000 |
| O | 0.821271000  | -2.946109000 | -3.127572000 |
| O | 2.646152000  | -2.265253000 | -1.951099000 |
| O | -1.523929000 | -1.098146000 | -3.549928000 |
| O | -2.292628000 | -2.851156000 | -2.323884000 |

|   |              |              |              |
|---|--------------|--------------|--------------|
| N | -0.086331000 | 0.517863000  | 0.393878000  |
| B | -1.415706000 | -0.450323000 | -0.006694000 |

110

Electronic Energy (BP86) = -2431.555174 a.u.

Zero-point correction (BP86) = 0.920034 a.u.

Thermal correction to Gibbs free Energy (BP86) = 0.833657 a.u.

Electronic Energy (M06) = -2433.359035 a.u.

3CY1

|   |              |              |              |
|---|--------------|--------------|--------------|
| C | -1.660893000 | 2.806055000  | -0.453235000 |
| C | 1.223942000  | 3.021900000  | -0.222641000 |
| C | -0.804545000 | 1.613626000  | -0.238413000 |
| C | -2.787853000 | 0.735369000  | 2.197690000  |
| H | -2.469993000 | 1.751399000  | 1.932592000  |
| C | 0.936358000  | -1.740056000 | -2.255188000 |
| C | 0.593913000  | -1.951996000 | -0.872785000 |
| C | 2.828722000  | -0.036140000 | -0.027357000 |
| H | 2.735953000  | -0.385094000 | -1.078103000 |
| C | 0.563310000  | 1.678256000  | -0.048839000 |
| C | -2.382384000 | -0.363097000 | 1.409341000  |
| C | 1.361693000  | 0.529747000  | 2.227484000  |
| H | 2.442151000  | 0.766563000  | 2.380288000  |
| C | 0.700193000  | -3.277214000 | -0.327910000 |
| C | -2.365879000 | -0.783530000 | -1.452061000 |
| C | 0.601274000  | 1.689852000  | 2.918031000  |
| H | -0.494687000 | 1.511947000  | 2.845248000  |
| H | 0.803566000  | 2.651844000  | 2.407546000  |
| C | 1.081131000  | -0.769333000 | 3.016671000  |

|   |              |              |              |
|---|--------------|--------------|--------------|
| H | 1.622473000  | -1.624421000 | 2.572027000  |
| H | -0.003775000 | -1.013794000 | 2.939515000  |
| C | -3.096744000 | 0.086238000  | -2.291533000 |
| H | -3.018331000 | 1.171698000  | -2.159684000 |
| C | 1.437400000  | -2.824262000 | -3.007763000 |
| H | 1.714313000  | -2.654675000 | -4.060610000 |
| C | 0.742652000  | -0.419898000 | -3.018142000 |
| H | 0.319136000  | 0.326089000  | -2.317402000 |
| C | 3.772397000  | 1.192909000  | -0.065868000 |
| H | 3.344143000  | 1.982150000  | -0.714000000 |
| H | 3.853840000  | 1.639941000  | 0.952177000  |
| C | 1.585889000  | -4.103078000 | -2.462391000 |
| H | 1.986669000  | -4.928557000 | -3.072123000 |
| C | -3.606444000 | 0.538978000  | 3.323630000  |
| H | -3.911036000 | 1.406454000  | 3.930095000  |
| C | 0.260853000  | -3.654011000 | 1.090840000  |
| H | -0.079833000 | -2.722279000 | 1.583406000  |
| C | 1.200167000  | -4.320230000 | -1.136411000 |
| H | 1.290107000  | -5.331342000 | -0.707523000 |
| C | -2.488412000 | -2.180591000 | -1.641249000 |
| H | -1.907095000 | -2.883642000 | -1.029794000 |
| C | -2.819089000 | -1.658469000 | 1.766435000  |
| H | -2.528754000 | -2.530441000 | 1.165563000  |
| C | 1.868493000  | 4.605412000  | -1.888842000 |
| H | 1.387436000  | 5.322205000  | -1.193021000 |
| H | 1.466979000  | 4.771980000  | -2.908636000 |
| C | -3.631683000 | -1.852470000 | 2.894258000  |

|   |              |              |              |
|---|--------------|--------------|--------------|
| H | -3.958958000 | -2.869925000 | 3.160116000  |
| C | -3.905095000 | 3.629670000  | -0.531732000 |
| H | -3.630406000 | 4.400360000  | 0.219565000  |
| H | -3.749289000 | 4.091190000  | -1.530871000 |
| C | -0.248870000 | -0.599327000 | -4.193052000 |
| H | 0.202675000  | -1.207106000 | -5.005905000 |
| H | -0.510404000 | 0.387523000  | -4.629978000 |
| H | -1.186416000 | -1.099622000 | -3.886863000 |
| C | 2.053904000  | 0.175622000  | -3.579517000 |
| H | 2.793434000  | 0.396940000  | -2.787418000 |
| H | 1.838571000  | 1.125710000  | -4.110824000 |
| H | 2.530297000  | -0.514568000 | -4.308256000 |
| C | 3.536330000  | -1.191721000 | 0.724785000  |
| H | 3.649352000  | -0.926561000 | 1.801184000  |
| H | 2.909209000  | -2.105424000 | 0.691409000  |
| C | 1.453648000  | -0.652670000 | 4.508794000  |
| H | 1.226979000  | -1.606787000 | 5.036112000  |
| H | 2.555496000  | -0.504725000 | 4.596003000  |
| C | 5.845197000  | -0.284863000 | 0.184038000  |
| H | 6.845648000  | -0.521935000 | -0.241240000 |
| H | 6.020048000  | 0.028445000  | 1.239890000  |
| C | -4.026786000 | -0.753486000 | 3.677633000  |
| H | -4.664340000 | -0.905516000 | 4.562920000  |
| C | 5.188469000  | 0.869554000  | -0.585613000 |
| H | 5.123771000  | 0.588377000  | -1.663209000 |
| H | 5.826030000  | 1.780783000  | -0.543357000 |
| C | 0.732377000  | 0.522158000  | 5.186783000  |

|   |              |              |              |
|---|--------------|--------------|--------------|
| H | -0.361547000 | 0.307732000  | 5.217796000  |
| H | 1.059749000  | 0.626629000  | 6.245275000  |
| C | -3.940277000 | -0.431568000 | -3.288975000 |
| H | -4.500736000 | 0.261518000  | -3.936033000 |
| C | 4.935168000  | -1.521263000 | 0.168819000  |
| H | 5.393255000  | -2.351067000 | 0.752070000  |
| H | 4.839017000  | -1.892823000 | -0.877878000 |
| C | 0.968379000  | 1.825954000  | 4.409118000  |
| H | 2.043825000  | 2.109598000  | 4.490267000  |
| H | 0.396207000  | 2.662422000  | 4.869571000  |
| C | 1.408099000  | -4.245847000 | 1.939128000  |
| H | 1.746049000  | -5.225343000 | 1.538105000  |
| H | 1.070724000  | -4.413994000 | 2.983506000  |
| H | 2.289878000  | -3.576851000 | 1.972095000  |
| C | -3.331279000 | -2.690914000 | -2.642197000 |
| H | -3.406673000 | -3.780860000 | -2.779910000 |
| C | -4.063800000 | -1.819473000 | -3.466104000 |
| H | -4.724299000 | -2.222586000 | -4.249993000 |
| C | -0.912071000 | -4.661923000 | 1.074140000  |
| H | -1.767656000 | -4.319922000 | 0.454703000  |
| H | -1.290894000 | -4.839172000 | 2.103009000  |
| H | -0.596244000 | -5.644441000 | 0.663625000  |
| P | -1.316361000 | -0.132097000 | -0.086679000 |
| O | -1.261400000 | 3.946278000  | -0.633526000 |
| O | -2.998487000 | 2.505463000  | -0.392106000 |
| O | 1.415006000  | 3.268730000  | -1.544523000 |
| O | 1.573611000  | 3.767169000  | 0.676120000  |



|   |              |              |              |
|---|--------------|--------------|--------------|
| N | 0.197641000  | -0.842948000 | -0.017031000 |
| B | 1.302611000  | 0.321173000  | 0.524730000  |
| C | 3.385779000  | 4.738742000  | -1.858969000 |
| H | 3.870163000  | 4.004930000  | -2.534873000 |
| H | 3.676505000  | 5.756897000  | -2.193662000 |
| H | 3.774519000  | 4.589655000  | -0.832838000 |
| C | -5.324198000 | 3.121695000  | -0.345791000 |
| H | -6.038388000 | 3.964515000  | -0.444884000 |
| H | -5.585398000 | 2.357986000  | -1.106116000 |
| H | -5.460579000 | 2.669266000  | 0.657093000  |

98

Electronic Energy (BP86) = -2274.550695 a.u.

Zero-point correction (BP86) = 0.811174 a.u.

Thermal correction to Gibbs free Energy (BP86) = 0.733091 a.u.

Electronic Energy (M06) = -2276.197287 a.u.

4CY1

|   |              |              |              |
|---|--------------|--------------|--------------|
| C | -1.319895000 | 1.406527000  | -3.124492000 |
| C | 1.567751000  | 1.049402000  | -3.042046000 |
| C | -0.640875000 | 0.842093000  | -1.937195000 |
| C | -2.333758000 | 2.937787000  | -0.080507000 |
| H | -1.966269000 | 3.114656000  | -1.099049000 |
| C | 0.212784000  | -2.841649000 | 0.029605000  |
| C | 0.096215000  | -1.697391000 | 0.895239000  |
| C | 2.694278000  | -0.559486000 | -0.236404000 |
| H | 2.367878000  | -1.600548000 | -0.449283000 |
| C | 0.732221000  | 0.730875000  | -1.834308000 |
| C | -2.177828000 | 1.672484000  | 0.525454000  |

|   |              |              |              |
|---|--------------|--------------|--------------|
| C | 1.722799000  | 1.962200000  | 0.310802000  |
| H | 2.835363000  | 1.976545000  | 0.218557000  |
| C | 0.125899000  | -1.896424000 | 2.317561000  |
| C | -2.736634000 | -0.963201000 | -0.500639000 |
| C | 1.245276000  | 3.257153000  | -0.394179000 |
| H | 0.137171000  | 3.331304000  | -0.326082000 |
| H | 1.498633000  | 3.233476000  | -1.472313000 |
| C | 1.402752000  | 2.079976000  | 1.818631000  |
| H | 1.752197000  | 1.185440000  | 2.365989000  |
| H | 0.297464000  | 2.114316000  | 1.954137000  |
| C | -3.515220000 | -1.069066000 | -1.674739000 |
| H | -3.293338000 | -0.438580000 | -2.544280000 |
| C | 0.433495000  | -4.111680000 | 0.604993000  |
| H | 0.541146000  | -4.983341000 | -0.060293000 |
| C | 0.054285000  | -2.807352000 | -1.498625000 |
| H | -0.151643000 | -1.762368000 | -1.802156000 |
| C | 3.794726000  | -0.232124000 | -1.279789000 |
| H | 3.389870000  | -0.322324000 | -2.306540000 |
| H | 4.119431000  | 0.828316000  | -1.167957000 |
| C | 0.515634000  | -4.296962000 | 1.988394000  |
| H | 0.698312000  | -5.298701000 | 2.409006000  |
| C | -2.973645000 | 3.981824000  | 0.609856000  |
| H | -3.086303000 | 4.963277000  | 0.123059000  |
| C | -0.115995000 | -0.780791000 | 3.340140000  |
| H | -0.235080000 | 0.161957000  | 2.771005000  |
| C | 0.341869000  | -3.193564000 | 2.829335000  |
| H | 0.376330000  | -3.337056000 | 3.921470000  |

|   |              |              |              |
|---|--------------|--------------|--------------|
| C | -3.058283000 | -1.775412000 | 0.612707000  |
| H | -2.453474000 | -1.736472000 | 1.528577000  |
| C | -2.681570000 | 1.472006000  | 1.830420000  |
| H | -2.585298000 | 0.494270000  | 2.321530000  |
| H | 2.160668000  | 0.277379000  | -4.647710000 |
| C | -3.313985000 | 2.518417000  | 2.519268000  |
| H | -3.695316000 | 2.346162000  | 3.538038000  |
| C | -1.138247000 | -3.683483000 | -1.951631000 |
| H | -0.915500000 | -4.762787000 | -1.811944000 |
| H | -1.340121000 | -3.528358000 | -3.032472000 |
| H | -2.066115000 | -3.459987000 | -1.392184000 |
| C | 1.314936000  | -3.261329000 | -2.269004000 |
| H | 2.195215000  | -2.628950000 | -2.049756000 |
| H | 1.128871000  | -3.206236000 | -3.361485000 |
| H | 1.579122000  | -4.312778000 | -2.026239000 |
| C | 3.341911000  | -0.616710000 | 1.170370000  |
| H | 3.684103000  | 0.401057000  | 1.468638000  |
| H | 2.588545000  | -0.927877000 | 1.921454000  |
| C | 2.015770000  | 3.341541000  | 2.460120000  |
| H | 1.751203000  | 3.388237000  | 3.540570000  |
| H | 3.127413000  | 3.266707000  | 2.416019000  |
| C | 5.629747000  | -1.187621000 | 0.226762000  |
| H | 6.488117000  | -1.894085000 | 0.271957000  |
| H | 6.038831000  | -0.182060000 | 0.481905000  |
| C | -3.461122000 | 3.777768000  | 1.910793000  |
| H | -3.958566000 | 4.598613000  | 2.451199000  |
| C | 5.031855000  | -1.149686000 | -1.186350000 |

|   |              |              |              |
|---|--------------|--------------|--------------|
| H | 4.736940000  | -2.185296000 | -1.476967000 |
| H | 5.797280000  | -0.828568000 | -1.927603000 |
| C | 1.567419000  | 4.622273000  | 1.739878000  |
| H | 0.472293000  | 4.762734000  | 1.896367000  |
| H | 2.062634000  | 5.515568000  | 2.181638000  |
| C | -4.595314000 | -1.966447000 | -1.728836000 |
| H | -5.191771000 | -2.038091000 | -2.651981000 |
| C | 4.550992000  | -1.568118000 | 1.250413000  |
| H | 4.971788000  | -1.565596000 | 2.280697000  |
| H | 4.211996000  | -2.612136000 | 1.055681000  |
| C | 1.852757000  | 4.527359000  | 0.233491000  |
| H | 2.955817000  | 4.517748000  | 0.070708000  |
| H | 1.473879000  | 5.432259000  | -0.292248000 |
| C | 1.059037000  | -0.594591000 | 4.325303000  |
| H | 1.191716000  | -1.487336000 | 4.973003000  |
| H | 0.870648000  | 0.273309000  | 4.991567000  |
| H | 2.018300000  | -0.416798000 | 3.801460000  |
| C | -4.138614000 | -2.670430000 | 0.549717000  |
| H | -4.369019000 | -3.300469000 | 1.422974000  |
| C | -4.912205000 | -2.767548000 | -0.619458000 |
| H | -5.758764000 | -3.470662000 | -0.666454000 |
| C | -1.407594000 | -1.031925000 | 4.154018000  |
| H | -2.299405000 | -1.194644000 | 3.512821000  |
| H | -1.624373000 | -0.169979000 | 4.820102000  |
| H | -1.311192000 | -1.932015000 | 4.797431000  |
| P | -1.371913000 | 0.264939000  | -0.362703000 |
| O | -0.785468000 | 1.703004000  | -4.181055000 |

|   |              |              |              |
|---|--------------|--------------|--------------|
| O | -2.665589000 | 1.616829000  | -2.929085000 |
| O | 1.592134000  | -0.009117000 | -3.897412000 |
| O | 2.209275000  | 2.067955000  | -3.225335000 |
| N | 0.011856000  | -0.349315000 | 0.352130000  |
| B | 1.352683000  | 0.417557000  | -0.341263000 |
| H | -2.989891000 | 2.014572000  | -3.767905000 |

104

Electronic Energy (BP86) = -2352.983421 a.u.

Zero-point correction (BP86) = 0.863047 a.u.

Thermal correction to Gibbs free Energy (BP86) = 0.778196 a.u.

Electronic Energy (M06) = -2354.699656 a.u.

2TS1, Number of imaginary frequency = 1(109.9i)

|   |              |              |              |
|---|--------------|--------------|--------------|
| C | 3.098455000  | 2.357002000  | -0.202511000 |
| C | 2.169289000  | 1.542586000  | -1.031509000 |
| C | 3.117016000  | -1.403095000 | -1.515478000 |
| H | 3.256973000  | -0.455689000 | -2.052629000 |
| C | -1.373268000 | -2.560867000 | 0.432655000  |
| C | -0.879523000 | -1.647654000 | -0.552818000 |
| C | -1.261249000 | 2.404420000  | -0.114912000 |
| H | -2.261369000 | 2.800914000  | 0.184551000  |
| C | 1.939910000  | 1.566963000  | -2.293819000 |
| C | 2.165626000  | -1.519922000 | -0.474959000 |
| C | -3.082214000 | 0.394174000  | -0.194326000 |
| H | -3.191082000 | -0.704383000 | -0.335890000 |
| C | -0.713950000 | -2.078506000 | -1.909338000 |
| C | 1.415318000  | -0.169382000 | 1.970903000  |
| C | -3.714892000 | 0.747271000  | 1.190829000  |

|   |              |              |              |
|---|--------------|--------------|--------------|
| H | -3.605877000 | 1.841179000  | 1.372888000  |
| H | -3.165300000 | 0.247820000  | 2.017419000  |
| C | -3.938072000 | 1.073012000  | -1.300932000 |
| H | -3.548077000 | 0.816094000  | -2.307412000 |
| H | -3.855081000 | 2.179941000  | -1.211808000 |
| C | 0.437406000  | 0.364299000  | 2.839785000  |
| H | -0.498009000 | 0.770004000  | 2.428899000  |
| C | -1.687582000 | -3.878219000 | 0.031237000  |
| H | -2.070951000 | -4.585658000 | 0.783774000  |
| C | -1.628806000 | -2.217323000 | 1.905265000  |
| H | -1.477412000 | -1.127174000 | 2.025662000  |
| C | -0.281090000 | 3.071787000  | 0.883970000  |
| H | -0.535544000 | 2.773968000  | 1.923156000  |
| H | 0.758084000  | 2.721901000  | 0.713650000  |
| C | -1.536983000 | -4.305042000 | -1.291119000 |
| H | -1.795127000 | -5.337317000 | -1.576718000 |
| C | 3.889292000  | -2.514315000 | -1.900511000 |
| H | 4.621455000  | -2.397475000 | -2.714638000 |
| C | -0.179401000 | -1.169052000 | -3.015134000 |
| H | 0.446399000  | -0.385500000 | -2.537708000 |
| C | -1.056242000 | -3.404442000 | -2.246590000 |
| H | -0.933484000 | -3.737102000 | -3.288022000 |
| C | 2.618531000  | -0.668051000 | 2.530906000  |
| H | 3.405897000  | -1.068520000 | 1.875947000  |
| C | 2.009597000  | -2.776235000 | 0.161280000  |
| H | 1.283928000  | -2.895995000 | 0.975560000  |
| C | 2.776570000  | -3.881998000 | -0.232672000 |

|   |              |              |              |
|---|--------------|--------------|--------------|
| H | 2.631608000  | -4.849118000 | 0.273959000  |
| C | -0.658683000 | -2.935993000 | 2.869008000  |
| H | 0.394497000  | -2.626018000 | 2.723090000  |
| H | -0.715438000 | -4.038524000 | 2.745622000  |
| H | -0.919844000 | -2.702989000 | 3.922425000  |
| C | -3.081362000 | -2.542305000 | 2.320674000  |
| H | -3.821237000 | -2.130258000 | 1.607699000  |
| H | -3.300499000 | -2.122437000 | 3.325006000  |
| H | -3.252025000 | -3.637741000 | 2.382112000  |
| C | -1.049791000 | 2.954946000  | -1.562464000 |
| H | -0.084207000 | 2.595492000  | -1.967981000 |
| H | -1.827586000 | 2.552996000  | -2.245000000 |
| C | -5.426481000 | 0.689144000  | -1.221295000 |
| H | -5.992317000 | 1.195804000  | -2.033595000 |
| H | -5.534452000 | -0.405444000 | -1.401793000 |
| C | -0.050243000 | 5.105030000  | -0.639440000 |
| H | -0.092812000 | 6.215629000  | -0.677608000 |
| H | 0.980489000  | 4.816593000  | -0.946231000 |
| C | 3.724621000  | -3.753861000 | -1.263774000 |
| H | 4.331535000  | -4.621003000 | -1.569924000 |
| C | -0.306109000 | 4.609305000  | 0.792164000  |
| H | -1.303061000 | 4.974946000  | 1.135051000  |
| H | 0.441019000  | 5.039978000  | 1.494323000  |
| C | -6.025407000 | 1.039059000  | 0.149512000  |
| H | -6.019809000 | 2.146278000  | 0.279123000  |
| H | -7.090374000 | 0.724462000  | 0.207183000  |
| C | 0.639145000  | 0.375951000  | 4.229813000  |

|   |              |              |              |
|---|--------------|--------------|--------------|
| H | -0.142243000 | 0.788022000  | 4.887917000  |
| C | -1.066472000 | 4.492769000  | -1.615953000 |
| H | -0.856638000 | 4.825992000  | -2.655411000 |
| H | -2.088298000 | 4.863979000  | -1.364341000 |
| C | -5.212185000 | 0.391730000  | 1.280662000  |
| H | -5.334171000 | -0.714061000 | 1.224691000  |
| H | -5.611929000 | 0.696074000  | 2.273210000  |
| C | -1.319223000 | -0.429299000 | -3.744696000 |
| H | -1.996931000 | -1.145297000 | -4.257483000 |
| H | -0.904102000 | 0.264782000  | -4.503842000 |
| H | -1.930895000 | 0.171712000  | -3.044802000 |
| C | 2.815260000  | -0.657265000 | 3.920789000  |
| H | 3.750367000  | -1.064284000 | 4.338153000  |
| C | 1.827698000  | -0.136529000 | 4.777513000  |
| H | 1.984993000  | -0.130542000 | 5.867604000  |
| C | 0.713442000  | -1.901138000 | -4.037987000 |
| H | 1.463474000  | -2.548285000 | -3.541099000 |
| H | 1.267562000  | -1.160123000 | -4.649092000 |
| H | 0.120034000  | -2.534480000 | -4.732300000 |
| P | 1.238443000  | -0.032130000 | 0.132821000  |
| O | 3.457528000  | 3.489072000  | -0.472476000 |
| N | -0.504695000 | -0.264922000 | -0.209635000 |
| B | -1.512903000 | 0.808050000  | -0.175374000 |
| O | 3.535909000  | 1.675528000  | 0.893482000  |
| C | 4.445338000  | 2.389362000  | 1.746525000  |
| H | 4.009129000  | 3.358443000  | 2.062181000  |
| H | 4.616619000  | 1.737540000  | 2.622393000  |



|   |             |             |              |
|---|-------------|-------------|--------------|
| H | 5.399769000 | 2.589651000 | 1.217763000  |
| C | 2.040742000 | 1.598682000 | -3.699348000 |
| O | 2.844046000 | 0.903750000 | -4.337614000 |
| O | 1.153733000 | 2.459046000 | -4.301947000 |
| C | 1.267994000 | 2.541722000 | -5.727487000 |
| H | 1.001187000 | 1.578772000 | -6.212725000 |
| H | 0.559712000 | 3.330522000 | -6.042474000 |
| H | 2.300397000 | 2.808368000 | -6.034456000 |

110

Electronic Energy (BP86) = -2431.503435 a.u.

Zero-point correction (BP86) = 0.91801 a.u.

Thermal correction to Gibbs free Energy (BP86) = 0.828451 a.u.

Electronic Energy (M06) = -2433.297646 a.u.

3TS1, Number of imaginary frequency = 1 (112.1i)

|   |              |              |              |
|---|--------------|--------------|--------------|
| C | 3.165836000  | 2.318128000  | -0.178406000 |
| C | 2.189410000  | 1.589437000  | -1.028304000 |
| C | 3.125889000  | -1.361625000 | -1.452375000 |
| H | 3.282486000  | -0.400082000 | -1.958500000 |
| C | -1.411365000 | -2.540752000 | 0.401444000  |
| C | -0.905577000 | -1.612538000 | -0.563285000 |
| C | -1.269253000 | 2.431541000  | -0.080420000 |
| H | -2.260784000 | 2.841012000  | 0.230226000  |
| C | 1.921096000  | 1.653124000  | -2.278277000 |
| C | 2.140819000  | -1.496704000 | -0.446361000 |
| C | -3.107538000 | 0.433522000  | -0.166798000 |
| H | -3.221190000 | -0.664379000 | -0.310387000 |
| C | -0.717238000 | -2.023145000 | -1.922895000 |

|   |              |              |              |
|---|--------------|--------------|--------------|
| C | 1.363455000  | -0.164140000 | 1.997780000  |
| C | -3.739787000 | 0.786913000  | 1.218299000  |
| H | -3.620925000 | 1.878992000  | 1.405137000  |
| H | -3.195906000 | 0.278713000  | 2.043588000  |
| C | -3.957754000 | 1.117632000  | -1.274260000 |
| H | -3.567554000 | 0.857384000  | -2.280035000 |
| H | -3.867132000 | 2.223970000  | -1.185510000 |
| C | 0.375756000  | 0.365886000  | 2.858045000  |
| H | -0.549477000 | 0.784959000  | 2.437425000  |
| C | -1.712628000 | -3.853989000 | -0.022544000 |
| H | -2.105849000 | -4.573052000 | 0.713745000  |
| C | -1.689235000 | -2.215342000 | 1.873928000  |
| H | -1.541513000 | -1.126401000 | 2.009272000  |
| C | -0.264091000 | 3.085099000  | 0.902923000  |
| H | -0.509275000 | 2.795780000  | 1.946656000  |
| H | 0.765652000  | 2.714720000  | 0.717701000  |
| C | -1.534767000 | -4.262824000 | -1.347519000 |
| H | -1.780945000 | -5.292995000 | -1.650796000 |
| C | 3.908370000  | -2.466104000 | -1.836158000 |
| H | 4.668225000  | -2.335394000 | -2.622434000 |
| C | -0.182940000 | -1.090493000 | -3.009191000 |
| H | 0.409961000  | -0.290690000 | -2.516116000 |
| C | -1.043906000 | -3.346870000 | -2.283327000 |
| H | -0.902306000 | -3.665103000 | -3.327167000 |
| C | 2.550841000  | -0.683811000 | 2.571444000  |
| H | 3.343035000  | -1.086752000 | 1.924083000  |
| C | 1.961903000  | -2.765111000 | 0.158459000  |

|   |              |              |              |
|---|--------------|--------------|--------------|
| H | 1.210749000  | -2.899351000 | 0.946973000  |
| C | 2.737954000  | -3.864988000 | -0.234700000 |
| H | 2.574222000  | -4.842249000 | 0.246134000  |
| C | -0.731227000 | -2.942897000 | 2.843011000  |
| H | 0.323728000  | -2.632240000 | 2.711566000  |
| H | -0.786985000 | -4.044384000 | 2.709791000  |
| H | -1.004567000 | -2.718447000 | 3.895210000  |
| C | -3.147456000 | -2.546684000 | 2.263110000  |
| H | -3.876166000 | -2.122113000 | 1.545782000  |
| H | -3.381420000 | -2.143165000 | 3.270782000  |
| H | -3.319462000 | -3.642938000 | 2.303597000  |
| C | -1.065731000 | 2.973755000  | -1.532725000 |
| H | -0.112797000 | 2.591044000  | -1.948224000 |
| H | -1.860974000 | 2.586192000  | -2.203346000 |
| C | -5.448983000 | 0.744670000  | -1.196480000 |
| H | -6.010176000 | 1.255184000  | -2.009618000 |
| H | -5.564982000 | -0.349181000 | -1.376481000 |
| C | -0.009781000 | 5.106129000  | -0.631273000 |
| H | -0.029385000 | 6.217234000  | -0.674414000 |
| H | 1.010730000  | 4.794708000  | -0.949417000 |
| C | 3.719078000  | -3.718431000 | -1.231874000 |
| H | 4.332960000  | -4.581109000 | -1.536760000 |
| C | -0.259246000 | 4.622261000  | 0.805385000  |
| H | -1.244201000 | 5.010341000  | 1.158282000  |
| H | 0.505263000  | 5.039718000  | 1.496631000  |
| C | -6.046345000 | 1.099940000  | 0.173643000  |
| H | -6.030550000 | 2.207088000  | 0.303262000  |

|   |              |              |              |
|---|--------------|--------------|--------------|
| H | -7.114275000 | 0.795278000  | 0.230037000  |
| C | 0.553730000  | 0.356493000  | 4.251303000  |
| H | -0.234946000 | 0.766924000  | 4.901693000  |
| C | -1.049962000 | 4.511195000  | -1.592937000 |
| H | -0.844268000 | 4.834384000  | -2.636165000 |
| H | -2.060751000 | 4.905182000  | -1.331353000 |
| C | -5.240459000 | 0.444777000  | 1.305532000  |
| H | -5.372503000 | -0.659726000 | 1.249061000  |
| H | -5.638840000 | 0.752289000  | 2.297665000  |
| C | -1.333579000 | -0.385108000 | -3.756140000 |
| H | -1.983737000 | -1.122707000 | -4.274025000 |
| H | -0.930566000 | 0.315787000  | -4.515533000 |
| H | -1.971967000 | 0.199339000  | -3.065748000 |
| C | 2.724237000  | -0.694243000 | 3.964833000  |
| H | 3.647594000  | -1.117423000 | 4.392164000  |
| C | 1.727980000  | -0.174818000 | 4.811921000  |
| H | 1.866792000  | -0.185188000 | 5.904492000  |
| C | 0.752753000  | -1.787566000 | -4.018178000 |
| H | 1.508287000  | -2.420160000 | -3.511136000 |
| H | 1.300222000  | -1.024922000 | -4.608806000 |
| H | 0.193542000  | -2.428913000 | -4.733129000 |
| P | 1.210157000  | -0.007534000 | 0.156960000  |
| O | 3.539476000  | 3.458587000  | -0.392198000 |
| N | -0.533477000 | -0.237760000 | -0.194783000 |
| B | -1.535850000 | 0.838383000  | -0.147334000 |
| O | 3.616405000  | 1.551717000  | 0.854010000  |
| C | 4.585338000  | 2.161237000  | 1.746424000  |

|   |              |             |              |
|---|--------------|-------------|--------------|
| H | 4.357705000  | 3.243990000 | 1.822899000  |
| H | 4.402730000  | 1.676537000 | 2.726482000  |
| C | 2.086461000  | 1.848621000 | -3.671439000 |
| O | 2.872864000  | 1.184079000 | -4.357178000 |
| O | 1.281787000  | 2.839845000 | -4.179689000 |
| C | 1.465606000  | 3.158800000 | -5.577385000 |
| H | 2.520485000  | 2.958631000 | -5.856360000 |
| H | 1.273433000  | 4.249225000 | -5.646260000 |
| C | 6.010623000  | 1.933903000 | 1.258877000  |
| H | 6.730611000  | 2.345410000 | 1.996746000  |
| H | 6.224662000  | 0.852832000 | 1.133641000  |
| H | 6.183169000  | 2.445061000 | 0.290820000  |
| C | 0.513255000  | 2.374745000 | -6.473544000 |
| H | 0.628218000  | 2.701666000 | -7.528601000 |
| H | 0.732718000  | 1.289282000 | -6.427075000 |
| H | -0.543008000 | 2.537733000 | -6.176278000 |

98

Electronic Energy (BP86) = -2274.499105 a.u.

Zero-point correction (BP86) = 0.809317 a.u.

Thermal correction to Gibbs free Energy (BP86) = 0.729189 a.u.

Electronic Energy (M06) = -2276.139132 a.u.

4TS1, Number of imaginary frequency = 1(115.9i)

|   |              |              |              |
|---|--------------|--------------|--------------|
| C | 3.205196000  | 2.248921000  | -0.112574000 |
| C | 2.249576000  | 1.527057000  | -0.997147000 |
| C | 3.103935000  | -1.430620000 | -1.641471000 |
| H | 3.214402000  | -0.482896000 | -2.186021000 |
| C | -1.309716000 | -2.594406000 | 0.346043000  |

|   |              |              |              |
|---|--------------|--------------|--------------|
| C | -0.830787000 | -1.660175000 | -0.626454000 |
| C | -1.211504000 | 2.382982000  | -0.096775000 |
| H | -2.211715000 | 2.775515000  | 0.207428000  |
| C | 2.049197000  | 1.660361000  | -2.258981000 |
| C | 2.202860000  | -1.555889000 | -0.557925000 |
| C | -3.031551000 | 0.373810000  | -0.192425000 |
| H | -3.143137000 | -0.721739000 | -0.353792000 |
| C | -0.677627000 | -2.061314000 | -1.993712000 |
| C | 1.479910000  | -0.212009000 | 1.913591000  |
| C | -3.647818000 | 0.700627000  | 1.206837000  |
| H | -3.531802000 | 1.789946000  | 1.410362000  |
| H | -3.091391000 | 0.181468000  | 2.016641000  |
| C | -3.898942000 | 1.075716000  | -1.275700000 |
| H | -3.522405000 | 0.836884000  | -2.291512000 |
| H | -3.811165000 | 2.180382000  | -1.166568000 |
| C | 0.498788000  | 0.308991000  | 2.787330000  |
| H | -0.440716000 | 0.708737000  | 2.380517000  |
| C | -1.619806000 | -3.905592000 | -0.078168000 |
| H | -1.991412000 | -4.630060000 | 0.663955000  |
| C | -1.562038000 | -2.278126000 | 1.825568000  |
| H | -1.418558000 | -1.189179000 | 1.965003000  |
| C | -0.228245000 | 3.039745000  | 0.905601000  |
| H | -0.471070000 | 2.725336000  | 1.942457000  |
| H | 0.811565000  | 2.703374000  | 0.715785000  |
| C | -1.480866000 | -4.304537000 | -1.410289000 |
| H | -1.735307000 | -5.332566000 | -1.713836000 |
| C | 3.865215000  | -2.536689000 | -2.060863000 |

|   |              |              |              |
|---|--------------|--------------|--------------|
| H | 4.557976000  | -2.415103000 | -2.908040000 |
| C | -0.159984000 | -1.124920000 | -3.086080000 |
| H | 0.490273000  | -0.367585000 | -2.599562000 |
| C | -1.016875000 | -3.382006000 | -2.353398000 |
| H | -0.904692000 | -3.694042000 | -3.402230000 |
| C | 2.687910000  | -0.706819000 | 2.467727000  |
| H | 3.475790000  | -1.097644000 | 1.808440000  |
| C | 2.084714000  | -2.811960000 | 0.086438000  |
| H | 1.396447000  | -2.936134000 | 0.932105000  |
| C | 2.842569000  | -3.911518000 | -0.341058000 |
| H | 2.729570000  | -4.879347000 | 0.172300000  |
| C | -0.586185000 | -3.005724000 | 2.776517000  |
| H | 0.463896000  | -2.681979000 | 2.638340000  |
| H | -0.631543000 | -4.106318000 | 2.632942000  |
| H | -0.850819000 | -2.794851000 | 3.833717000  |
| C | -3.012177000 | -2.619159000 | 2.237229000  |
| H | -3.755315000 | -2.198747000 | 1.532474000  |
| H | -3.232297000 | -2.218314000 | 3.249050000  |
| H | -3.176344000 | -3.716483000 | 2.279361000  |
| C | -0.995416000 | 2.949086000  | -1.536883000 |
| H | -0.025231000 | 2.595853000  | -1.936174000 |
| H | -1.766000000 | 2.552018000  | -2.230353000 |
| C | -5.387359000 | 0.694575000  | -1.185957000 |
| H | -5.960561000 | 1.218203000  | -1.982139000 |
| H | -5.500798000 | -0.396043000 | -1.386055000 |
| C | -0.005512000 | 5.092983000  | -0.588275000 |
| H | -0.053766000 | 6.203698000  | -0.613528000 |

|   |              |              |              |
|---|--------------|--------------|--------------|
| H | 1.028229000  | 4.812570000  | -0.891621000 |
| C | 3.740286000  | -3.776493000 | -1.415409000 |
| H | 4.339665000  | -4.638966000 | -1.748341000 |
| C | -0.261743000 | 4.578097000  | 0.836293000  |
| H | -1.260413000 | 4.934531000  | 1.184175000  |
| H | 0.484886000  | 5.000684000  | 1.543448000  |
| C | -5.969649000 | 1.020176000  | 0.197820000  |
| H | -5.959014000 | 2.124656000  | 0.348515000  |
| H | -7.034830000 | 0.707627000  | 0.261825000  |
| C | 0.703440000  | 0.314192000  | 4.176591000  |
| H | -0.079303000 | 0.717003000  | 4.838669000  |
| C | -1.014867000 | 4.487385000  | -1.575982000 |
| H | -0.800293000 | 4.829196000  | -2.611677000 |
| H | -2.039256000 | 4.853111000  | -1.326980000 |
| C | -5.145446000 | 0.348530000  | 1.306582000  |
| H | -5.271947000 | -0.755535000 | 1.230971000  |
| H | -5.532300000 | 0.635016000  | 2.309476000  |
| C | -1.306860000 | -0.345651000 | -3.761311000 |
| H | -2.002765000 | -1.035581000 | -4.285064000 |
| H | -0.899842000 | 0.373593000  | -4.500950000 |
| H | -1.896338000 | 0.233669000  | -3.025529000 |
| C | 2.886364000  | -0.702418000 | 3.857184000  |
| H | 3.825598000  | -1.103651000 | 4.270506000  |
| C | 1.897059000  | -0.193153000 | 4.718239000  |
| H | 2.056934000  | -0.191553000 | 5.807967000  |
| C | 0.691597000  | -1.836230000 | -4.157159000 |
| H | 1.444445000  | -2.511299000 | -3.703712000 |



|   |              |              |              |
|---|--------------|--------------|--------------|
| H | 1.240592000  | -1.083360000 | -4.757968000 |
| H | 0.066492000  | -2.435677000 | -4.853574000 |
| P | 1.289622000  | -0.077742000 | 0.080384000  |
| O | 3.427719000  | 3.445327000  | -0.139918000 |
| N | -0.453916000 | -0.284126000 | -0.257157000 |
| B | -1.462778000 | 0.788716000  | -0.184166000 |
| O | 3.858983000  | 1.399157000  | 0.732225000  |
| C | 2.028555000  | 1.617060000  | -3.662334000 |
| O | 2.778820000  | 0.886763000  | -4.331651000 |
| O | 1.112784000  | 2.449068000  | -4.261485000 |
| H | 4.447924000  | 1.963481000  | 1.281595000  |
| H | 1.260941000  | 2.314861000  | -5.223191000 |

104

Electronic Energy (BP86) = -2352.985207 a.u.

Zero-point correction (BP86) = 0.864112 a.u.

Thermal correction to Gibbs free Energy (BP86) = 0.780222 a.u.

Electronic Energy (M06) = -2354.709752 a.u.

2TS2, Number of imaginary frequency = 1(31.9i)

|   |              |              |              |
|---|--------------|--------------|--------------|
| C | -2.165490000 | 2.659277000  | 0.265740000  |
| C | 0.094173000  | 2.878093000  | 2.330967000  |
| C | -1.088397000 | 1.656749000  | 0.515524000  |
| C | -2.543752000 | -0.251856000 | 2.445696000  |
| H | -2.252321000 | 0.801645000  | 2.577711000  |
| C | 0.728875000  | -3.102316000 | -0.677822000 |
| C | 0.702368000  | -2.009618000 | 0.248064000  |
| C | 1.515219000  | 1.558435000  | -1.622368000 |
| H | 2.543791000  | 1.446193000  | -2.047730000 |

|   |              |              |              |
|---|--------------|--------------|--------------|
| C | -0.032847000 | 1.837173000  | 1.340870000  |
| C | -2.075155000 | -0.992806000 | 1.337826000  |
| C | 3.004513000  | -0.214468000 | -0.225106000 |
| H | 2.946613000  | -1.002959000 | 0.554216000  |
| C | 1.019142000  | -2.234988000 | 1.629978000  |
| C | -2.388040000 | -0.452988000 | -1.443766000 |
| C | 3.742491000  | -0.872777000 | -1.425993000 |
| H | 3.831898000  | -0.138464000 | -2.260839000 |
| H | 3.147049000  | -1.720474000 | -1.823254000 |
| C | 3.894451000  | 0.924518000  | 0.348543000  |
| H | 3.398264000  | 1.400398000  | 1.221167000  |
| H | 4.010235000  | 1.729777000  | -0.411825000 |
| C | -3.764424000 | -0.633779000 | -1.151676000 |
| H | -4.119089000 | -0.594170000 | -0.113106000 |
| C | 1.077243000  | -4.387084000 | -0.207646000 |
| H | 1.096339000  | -5.228484000 | -0.918335000 |
| C | 0.352703000  | -2.986755000 | -2.158755000 |
| H | 0.244013000  | -1.908617000 | -2.386366000 |
| C | 0.603933000  | 1.570663000  | -2.870298000 |
| H | 0.628196000  | 0.579074000  | -3.374038000 |
| H | -0.452442000 | 1.761584000  | -2.573453000 |
| C | 1.399848000  | -4.614695000 | 1.133222000  |
| H | 1.677042000  | -5.623924000 | 1.477538000  |
| C | -3.358966000 | -0.874251000 | 3.408490000  |
| H | -3.724355000 | -0.286834000 | 4.265224000  |
| C | 1.007285000  | -1.162237000 | 2.727274000  |
| H | 0.596561000  | -0.221112000 | 2.297986000  |

|   |              |              |              |
|---|--------------|--------------|--------------|
| C | 1.364561000  | -3.543896000 | 2.031412000  |
| H | 1.615549000  | -3.720307000 | 3.089069000  |
| C | -1.980088000 | -0.494509000 | -2.793262000 |
| H | -0.925071000 | -0.359395000 | -3.052819000 |
| C | -2.401425000 | -2.364581000 | 1.224523000  |
| H | -2.041520000 | -2.952222000 | 0.367210000  |
| C | 1.240130000  | 4.774560000  | 3.146355000  |
| H | 0.322338000  | 5.386598000  | 3.270617000  |
| H | 2.082608000  | 5.417952000  | 2.830531000  |
| H | 1.469706000  | 4.292720000  | 4.119642000  |
| C | -3.196043000 | -2.982162000 | 2.202632000  |
| H | -3.438149000 | -4.052540000 | 2.110539000  |
| C | -4.437953000 | 2.988795000  | -0.334778000 |
| H | -4.700203000 | 3.562259000  | 0.577879000  |
| H | -5.292507000 | 2.366187000  | -0.657703000 |
| H | -4.160288000 | 3.708632000  | -1.131272000 |
| C | -1.001783000 | -3.677311000 | -2.437762000 |
| H | -0.939283000 | -4.767293000 | -2.231934000 |
| H | -1.297660000 | -3.551163000 | -3.500278000 |
| H | -1.820269000 | -3.260857000 | -1.817530000 |
| C | 1.424160000  | -3.559722000 | -3.111144000 |
| H | 2.421587000  | -3.109199000 | -2.938470000 |
| H | 1.141627000  | -3.364942000 | -4.167190000 |
| H | 1.529719000  | -4.659539000 | -3.000861000 |
| C | 1.530474000  | 2.989167000  | -1.007230000 |
| H | 0.507115000  | 3.268524000  | -0.685853000 |
| H | 2.143001000  | 3.027349000  | -0.086872000 |

|   |              |              |              |
|---|--------------|--------------|--------------|
| C | 5.299081000  | 0.426062000  | 0.737298000  |
| H | 5.907623000  | 1.271422000  | 1.127246000  |
| H | 5.215178000  | -0.306020000 | 1.573733000  |
| C | 1.120899000  | 4.043316000  | -3.275559000 |
| H | 1.491627000  | 4.774918000  | -4.026959000 |
| H | 0.098290000  | 4.380640000  | -2.988720000 |
| C | -3.689718000 | -2.233812000 | 3.287980000  |
| H | -4.326099000 | -2.717394000 | 4.046252000  |
| C | 1.034620000  | 2.639752000  | -3.896152000 |
| H | 2.034918000  | 2.359508000  | -4.301847000 |
| H | 0.337598000  | 2.637944000  | -4.763569000 |
| C | 6.010944000  | -0.244075000 | -0.448412000 |
| H | 6.209545000  | 0.521104000  | -1.234835000 |
| H | 7.004597000  | -0.636188000 | -0.139040000 |
| C | -4.691430000 | -0.854518000 | -2.181327000 |
| H | -5.754163000 | -0.997839000 | -1.929028000 |
| C | 2.011980000  | 4.039855000  | -2.023015000 |
| H | 2.015357000  | 5.045747000  | -1.549646000 |
| H | 3.066843000  | 3.827571000  | -2.317793000 |
| C | 5.150762000  | -1.369376000 | -1.046918000 |
| H | 5.055231000  | -2.193964000 | -0.303383000 |
| H | 5.651520000  | -1.809800000 | -1.937550000 |
| C | 2.421208000  | -0.831843000 | 3.257170000  |
| H | 2.907610000  | -1.730524000 | 3.694985000  |
| H | 2.350100000  | -0.066274000 | 4.057826000  |
| H | 3.089137000  | -0.431780000 | 2.474178000  |
| C | -2.911879000 | -0.711695000 | -3.822683000 |

|   |              |              |              |
|---|--------------|--------------|--------------|
| H | -2.564204000 | -0.742729000 | -4.867335000 |
| C | -4.271097000 | -0.893698000 | -3.522624000 |
| H | -5.000688000 | -1.068348000 | -4.329172000 |
| C | 0.137835000  | -1.585676000 | 3.934384000  |
| H | -0.837731000 | -2.008644000 | 3.631688000  |
| H | -0.054314000 | -0.706906000 | 4.583897000  |
| H | 0.652865000  | -2.347925000 | 4.558349000  |
| P | -1.234735000 | -0.092748000 | -0.033130000 |
| O | -2.024946000 | 3.866139000  | 0.365820000  |
| O | -3.358340000 | 2.078599000  | -0.070380000 |
| O | 1.077395000  | 3.801030000  | 2.108002000  |
| O | -0.559484000 | 2.837289000  | 3.380607000  |
| N | 0.391055000  | -0.656487000 | -0.252763000 |
| B | 1.515573000  | 0.276216000  | -0.615920000 |

110

Electronic Energy (BP86) = -2431.505703 a.u.

Zero-point correction (BP86) = 0.919205 a.u.

Thermal correction to Gibbs free Energy (BP86) = 0.831602 a.u.

Electronic Energy (M06) = -2433.308198 a.u.

3TS2, Number of imaginary frequency = 1(32.4i)

|   |              |              |              |
|---|--------------|--------------|--------------|
| C | -2.214580000 | 2.642874000  | 0.226073000  |
| C | 0.027907000  | 2.902746000  | 2.295380000  |
| C | -1.126045000 | 1.654731000  | 0.484735000  |
| C | -2.574346000 | -0.260744000 | 2.419039000  |
| H | -2.291400000 | 0.795468000  | 2.548824000  |
| C | 0.746151000  | -3.086988000 | -0.676469000 |
| C | 0.699434000  | -1.992821000 | 0.246792000  |

|   |              |              |              |
|---|--------------|--------------|--------------|
| C | 1.484101000  | 1.575458000  | -1.631087000 |
| H | 2.515947000  | 1.468444000  | -2.050134000 |
| C | -0.071637000 | 1.853412000  | 1.308645000  |
| C | -2.097047000 | -1.001198000 | 1.314596000  |
| C | 2.981988000  | -0.164453000 | -0.199493000 |
| H | 2.923939000  | -0.947474000 | 0.585233000  |
| C | 1.008957000  | -2.211735000 | 1.631531000  |
| C | -2.401676000 | -0.471196000 | -1.469142000 |
| C | 3.739629000  | -0.824345000 | -1.387268000 |
| H | 3.830162000  | -0.095695000 | -2.226932000 |
| H | 3.157793000  | -1.681682000 | -1.784066000 |
| C | 3.853501000  | 0.988510000  | 0.374166000  |
| H | 3.342804000  | 1.465396000  | 1.237815000  |
| H | 3.967922000  | 1.789117000  | -0.391317000 |
| C | -3.778405000 | -0.655702000 | -1.180835000 |
| H | -4.136493000 | -0.610257000 | -0.143859000 |
| C | 1.107932000  | -4.366313000 | -0.201739000 |
| H | 1.142576000  | -5.208690000 | -0.910705000 |
| C | 0.378340000  | -2.978412000 | -2.159972000 |
| H | 0.255100000  | -1.902238000 | -2.389387000 |
| C | 0.577875000  | 1.561399000  | -2.882213000 |
| H | 0.616645000  | 0.563750000  | -3.372781000 |
| H | -0.481754000 | 1.742802000  | -2.591046000 |
| C | 1.424720000  | -4.587149000 | 1.141643000  |
| H | 1.712828000  | -5.591993000 | 1.489808000  |
| C | -3.388495000 | -0.886748000 | 3.380498000  |
| H | -3.760332000 | -0.300291000 | 4.235131000  |

|   |              |              |              |
|---|--------------|--------------|--------------|
| C | 0.972391000  | -1.138357000 | 2.727991000  |
| H | 0.551990000  | -0.203837000 | 2.294078000  |
| C | 1.368964000  | -3.515305000 | 2.037549000  |
| H | 1.614635000  | -3.686764000 | 3.097263000  |
| C | -1.988805000 | -0.521154000 | -2.816944000 |
| H | -0.933392000 | -0.384383000 | -3.073930000 |
| C | -2.413398000 | -2.375388000 | 1.203228000  |
| H | -2.046750000 | -2.962600000 | 0.348421000  |
| C | 1.144790000  | 4.823856000  | 3.130914000  |
| H | 0.177809000  | 5.355383000  | 3.267205000  |
| H | 1.365438000  | 4.311881000  | 4.093178000  |
| C | -3.207502000 | -2.996180000 | 2.179798000  |
| H | -3.442230000 | -4.068331000 | 2.089163000  |
| C | -4.528845000 | 2.916623000  | -0.351403000 |
| H | -5.171921000 | 2.329354000  | -1.038150000 |
| H | -4.144756000 | 3.810566000  | -0.884196000 |
| C | -0.964177000 | -3.688607000 | -2.447356000 |
| H | -0.888246000 | -4.777308000 | -2.239210000 |
| H | -1.254128000 | -3.568426000 | -3.512214000 |
| H | -1.792832000 | -3.282430000 | -1.833717000 |
| C | 1.464958000  | -3.535792000 | -3.104275000 |
| H | 2.453649000  | -3.068591000 | -2.925767000 |
| H | 1.186366000  | -3.347502000 | -4.162550000 |
| H | 1.587732000  | -4.633542000 | -2.991087000 |
| C | 1.481277000  | 3.013328000  | -1.033460000 |
| H | 0.454190000  | 3.284819000  | -0.716756000 |
| H | 2.092708000  | 3.068354000  | -0.113278000 |

|   |              |              |              |
|---|--------------|--------------|--------------|
| C | 5.259408000  | 0.508681000  | 0.781336000  |
| H | 5.854878000  | 1.363508000  | 1.170876000  |
| H | 5.174527000  | -0.217840000 | 1.622499000  |
| C | 1.064079000  | 4.034891000  | -3.315461000 |
| H | 1.426927000  | 4.762688000  | -4.074374000 |
| H | 0.036409000  | 4.361527000  | -3.034558000 |
| C | -3.709932000 | -2.248754000 | 3.261730000  |
| H | -4.345724000 | -2.734944000 | 4.018841000  |
| C | 0.998115000  | 2.623149000  | -3.919714000 |
| H | 2.003291000  | 2.351154000  | -4.318955000 |
| H | 0.303933000  | 2.601950000  | -4.789158000 |
| C | 5.990799000  | -0.163088000 | -0.391473000 |
| H | 6.189351000  | 0.598010000  | -1.181867000 |
| H | 6.985351000  | -0.541899000 | -0.068644000 |
| C | -4.701097000 | -0.886892000 | -2.212141000 |
| H | -5.764124000 | -1.032526000 | -1.962443000 |
| C | 1.952342000  | 4.057326000  | -2.061089000 |
| H | 1.942729000  | 5.069073000  | -1.600406000 |
| H | 3.010286000  | 3.854356000  | -2.351372000 |
| C | 5.149129000  | -1.302453000 | -0.989706000 |
| H | 5.055051000  | -2.122248000 | -0.240721000 |
| H | 5.663948000  | -1.744241000 | -1.871604000 |
| C | 2.375896000  | -0.786390000 | 3.271574000  |
| H | 2.873242000  | -1.678263000 | 3.710975000  |
| H | 2.284894000  | -0.024745000 | 4.073965000  |
| H | 3.043951000  | -0.372539000 | 2.496011000  |
| C | -2.916135000 | -0.749427000 | -3.848028000 |



|   |              |              |              |
|---|--------------|--------------|--------------|
| H | -2.564521000 | -0.786782000 | -4.891145000 |
| C | -4.275771000 | -0.934057000 | -3.551657000 |
| H | -5.001773000 | -1.117014000 | -4.359605000 |
| C | 0.098074000  | -1.574805000 | 3.926968000  |
| H | -0.867595000 | -2.013380000 | 3.614999000  |
| H | -0.114258000 | -0.699287000 | 4.574606000  |
| H | 0.619091000  | -2.328666000 | 4.556111000  |
| P | -1.256652000 | -0.098159000 | -0.054469000 |
| O | -2.069391000 | 3.853211000  | 0.278595000  |
| O | -3.410037000 | 2.041095000  | -0.059790000 |
| O | 1.001863000  | 3.836521000  | 2.087999000  |
| O | -0.646527000 | 2.855831000  | 3.332458000  |
| N | 0.375332000  | -0.645363000 | -0.259911000 |
| B | 1.491411000  | 0.304992000  | -0.609668000 |
| C | -5.273110000 | 3.316577000  | 0.916586000  |
| H | -6.159585000 | 3.932185000  | 0.656401000  |
| H | -5.624144000 | 2.424516000  | 1.474627000  |
| H | -4.620086000 | 3.917017000  | 1.580554000  |
| C | 2.258301000  | 5.775850000  | 2.726288000  |
| H | 2.393769000  | 6.555573000  | 3.504083000  |
| H | 3.221010000  | 5.238332000  | 2.604571000  |
| H | 2.021452000  | 6.280650000  | 1.767563000  |

98

Electronic Energy (BP86) = -2274.500681 a.u.

Zero-point correction (BP86) = 0.81049 a.u.

Thermal correction to Gibbs free Energy (BP86) = 0.731604 a.u.

Electronic Energy (M06) = -2276.150377 a.u.

4TS2, Number of imaginary frequency = 1(34.1i)

|   |              |              |              |
|---|--------------|--------------|--------------|
| C | -2.309810000 | 2.938727000  | 0.381363000  |
| C | -0.022789000 | 3.153177000  | 2.439724000  |
| C | -1.234170000 | 1.935965000  | 0.630150000  |
| C | -2.685992000 | 0.024754000  | 2.557933000  |
| H | -2.392739000 | 1.077256000  | 2.692935000  |
| C | 0.597390000  | -2.821066000 | -0.551921000 |
| C | 0.566115000  | -1.724942000 | 0.369811000  |
| C | 1.370130000  | 1.843107000  | -1.508174000 |
| H | 2.396113000  | 1.731271000  | -1.939884000 |
| C | -0.175533000 | 2.122191000  | 1.449337000  |
| C | -2.218074000 | -0.714344000 | 1.448495000  |
| C | 2.865921000  | 0.070365000  | -0.116027000 |
| H | 2.810445000  | -0.718009000 | 0.663722000  |
| C | 0.879354000  | -1.944214000 | 1.753391000  |
| C | -2.524257000 | -0.168734000 | -1.332893000 |
| C | 3.600334000  | -0.587859000 | -1.319247000 |
| H | 3.688525000  | 0.147234000  | -2.153505000 |
| H | 3.003035000  | -1.434395000 | -1.716015000 |
| C | 3.758276000  | 1.209057000  | 0.454536000  |
| H | 3.265308000  | 1.686652000  | 1.328083000  |
| H | 3.873453000  | 2.013392000  | -0.306864000 |
| C | -3.904149000 | -0.326642000 | -1.044731000 |
| H | -4.263348000 | -0.272063000 | -0.008497000 |
| C | 0.946523000  | -4.103312000 | -0.075448000 |
| H | 0.969279000  | -4.947526000 | -0.782625000 |
| C | 0.226202000  | -2.712597000 | -2.034641000 |

|   |              |              |              |
|---|--------------|--------------|--------------|
| H | 0.121554000  | -1.635396000 | -2.268471000 |
| C | 0.451146000  | 1.858736000  | -2.750531000 |
| H | 0.475499000  | 0.869566000  | -3.258631000 |
| H | -0.604492000 | 2.044591000  | -2.447658000 |
| C | 1.265310000  | -4.325136000 | 1.267277000  |
| H | 1.543048000  | -5.332551000 | 1.616377000  |
| C | -3.503462000 | -0.598128000 | 3.518447000  |
| H | -3.868566000 | -0.011961000 | 4.376115000  |
| C | 0.863839000  | -0.866977000 | 2.846006000  |
| H | 0.449179000  | 0.070488000  | 2.413079000  |
| C | 1.225730000  | -3.250903000 | 2.161095000  |
| H | 1.474083000  | -3.422677000 | 3.220103000  |
| C | -2.110557000 | -0.226484000 | -2.680265000 |
| H | -1.052254000 | -0.110119000 | -2.935794000 |
| C | -2.547685000 | -2.084997000 | 1.331056000  |
| H | -2.188766000 | -2.671183000 | 0.472357000  |
| H | 0.947430000  | 4.633055000  | 3.038266000  |
| C | -3.344037000 | -2.703258000 | 2.307154000  |
| H | -3.588642000 | -3.772788000 | 2.212068000  |
| H | -4.123687000 | 3.134483000  | -0.102339000 |
| C | -1.129318000 | -3.400943000 | -2.314354000 |
| H | -1.070259000 | -4.489813000 | -2.101819000 |
| H | -1.421055000 | -3.280406000 | -3.378648000 |
| H | -1.949091000 | -2.978769000 | -1.699809000 |
| C | 1.298417000  | -3.294072000 | -2.981083000 |
| H | 2.297762000  | -2.848826000 | -2.805956000 |
| H | 1.020938000  | -3.100648000 | -4.038697000 |

|   |              |              |              |
|---|--------------|--------------|--------------|
| H | 1.397296000  | -4.394134000 | -2.867642000 |
| C | 1.390513000  | 3.272203000  | -0.888581000 |
| H | 0.369657000  | 3.551100000  | -0.558781000 |
| H | 2.012499000  | 3.308134000  | 0.025440000  |
| C | 5.162952000  | 0.708724000  | 0.840649000  |
| H | 5.773254000  | 1.553353000  | 1.229306000  |
| H | 5.079459000  | -0.023120000 | 1.677331000  |
| C | 0.961609000  | 4.334119000  | -3.149440000 |
| H | 1.325214000  | 5.069251000  | -3.900809000 |
| H | -0.059175000 | 4.668773000  | -2.853187000 |
| C | -3.836768000 | -1.956645000 | 3.394174000  |
| H | -4.474869000 | -2.440774000 | 4.150614000  |
| C | 0.873000000  | 2.932896000  | -3.774783000 |
| H | 1.870922000  | 2.655933000  | -4.188514000 |
| H | 0.169891000  | 2.933151000  | -4.637211000 |
| C | 5.871672000  | 0.037622000  | -0.346415000 |
| H | 6.070076000  | 0.802611000  | -1.133042000 |
| H | 6.865252000  | -0.356008000 | -0.038832000 |
| C | -4.829909000 | -0.540254000 | -2.076870000 |
| H | -5.896066000 | -0.662493000 | -1.828362000 |
| C | 1.862929000  | 4.327011000  | -1.904413000 |
| H | 1.869365000  | 5.330680000  | -1.426585000 |
| H | 2.915520000  | 4.116499000  | -2.208308000 |
| C | 5.008864000  | -1.086328000 | -0.943651000 |
| H | 4.913939000  | -1.911312000 | -0.200483000 |
| H | 5.507029000  | -1.526726000 | -1.835733000 |
| C | 2.277100000  | -0.528239000 | 3.372309000  |

|   |              |              |              |
|---|--------------|--------------|--------------|
| H | 2.768077000  | -1.423174000 | 3.812587000  |
| H | 2.204020000  | 0.240222000  | 4.169996000  |
| H | 2.941786000  | -0.128510000 | 2.586344000  |
| C | -3.041059000 | -0.437460000 | -3.711726000 |
| H | -2.689842000 | -0.481942000 | -4.754678000 |
| C | -4.404284000 | -0.596151000 | -3.415562000 |
| H | -5.133157000 | -0.764993000 | -4.224003000 |
| C | -0.003517000 | -1.287907000 | 4.055433000  |
| H | -0.976960000 | -1.717326000 | 3.754692000  |
| H | -0.199997000 | -0.406233000 | 4.699650000  |
| H | 0.515012000  | -2.044004000 | 4.683898000  |
| P | -1.374057000 | 0.185331000  | 0.080115000  |
| O | -2.168697000 | 4.145380000  | 0.483703000  |
| O | -3.512430000 | 2.377998000  | 0.042813000  |
| O | 0.952303000  | 4.084338000  | 2.222705000  |
| O | -0.650499000 | 3.105553000  | 3.506645000  |
| N | 0.253342000  | -0.373490000 | -0.136216000 |
| B | 1.376106000  | 0.559506000  | -0.504019000 |

104

Electronic Energy (BP86) = -2353.023297 a.u.

Zero-point correction (BP86) = 0.864968 a.u.

Thermal correction to Gibbs free Energy (BP86) = 0.783261 a.u.

Electronic Energy (M06) = -2354.743001 a.u.

2TS3, Number of imaginary frequency = 1(235.8i)

|   |              |              |              |
|---|--------------|--------------|--------------|
| C | 1.181205000  | -2.508504000 | -1.875120000 |
| C | -1.751184000 | -1.836699000 | -2.202827000 |
| C | 0.526763000  | -1.389588000 | -1.215064000 |

|   |              |              |              |
|---|--------------|--------------|--------------|
| C | 2.160329000  | -2.225956000 | 1.484999000  |
| H | 1.282129000  | -2.750756000 | 1.083374000  |
| C | -0.352533000 | 3.028314000  | -0.330756000 |
| C | -0.094659000 | 2.032573000  | 0.678513000  |
| C | -2.780749000 | 0.660037000  | -0.055599000 |
| H | -2.501105000 | 1.704398000  | -0.311836000 |
| C | -0.887932000 | -1.212536000 | -1.145394000 |
| C | 2.455412000  | -0.920056000 | 1.033412000  |
| C | -1.774470000 | -1.966464000 | 0.784191000  |
| H | -2.865068000 | -1.848914000 | 0.629548000  |
| C | 0.157444000  | 2.440713000  | 2.027303000  |
| C | 2.470850000  | 1.023796000  | -1.084194000 |
| C | -1.391217000 | -3.425167000 | 0.483121000  |
| H | -0.283780000 | -3.540517000 | 0.482528000  |
| H | -1.737622000 | -3.724163000 | -0.521050000 |
| C | -1.354720000 | -1.602423000 | 2.215879000  |
| H | -1.638303000 | -0.569101000 | 2.480843000  |
| H | -0.247531000 | -1.647459000 | 2.299070000  |
| C | 2.942016000  | 0.685940000  | -2.371739000 |
| H | 2.583546000  | -0.232721000 | -2.856655000 |
| C | -0.367609000 | 4.385536000  | 0.055506000  |
| H | -0.569364000 | 5.152961000  | -0.708584000 |
| C | -0.611533000 | 2.735605000  | -1.820454000 |
| H | -0.613280000 | 1.634448000  | -1.962767000 |
| C | -3.836560000 | 0.228510000  | -1.106549000 |
| H | -3.386576000 | 0.250938000  | -2.122250000 |
| H | -4.128932000 | -0.831035000 | -0.937103000 |

|   |              |              |              |
|---|--------------|--------------|--------------|
| C | -0.131442000 | 4.786885000  | 1.375226000  |
| H | -0.151136000 | 5.855056000  | 1.644598000  |
| C | 2.991170000  | -2.871910000 | 2.413930000  |
| H | 2.741943000  | -3.891544000 | 2.747884000  |
| C | 0.472500000  | 1.458252000  | 3.158307000  |
| H | 0.509240000  | 0.444895000  | 2.711853000  |
| C | 0.132113000  | 3.815597000  | 2.346076000  |
| H | 0.322082000  | 4.127683000  | 3.385752000  |
| C | 2.938360000  | 2.206274000  | -0.460532000 |
| H | 2.560472000  | 2.506454000  | 0.528214000  |
| C | 3.629785000  | -0.292641000 | 1.508239000  |
| H | 3.924293000  | 0.697163000  | 1.132779000  |
| C | -2.017753000 | -1.970224000 | -4.544745000 |
| H | -3.109595000 | -1.785156000 | -4.478438000 |
| H | -1.845585000 | -3.065299000 | -4.588909000 |
| H | -1.596568000 | -1.480254000 | -5.442083000 |
| C | 4.460283000  | -0.939250000 | 2.439927000  |
| H | 5.370533000  | -0.432179000 | 2.797263000  |
| C | 3.292021000  | -3.490545000 | -2.384452000 |
| H | 3.029216000  | -3.636959000 | -3.452626000 |
| H | 3.077438000  | -4.437704000 | -1.846272000 |
| H | 4.362861000  | -3.232502000 | -2.283294000 |
| C | 0.476168000  | 3.336502000  | -2.740758000 |
| H | 0.469331000  | 4.446360000  | -2.691116000 |
| H | 0.274900000  | 3.053895000  | -3.795437000 |
| H | 1.493728000  | 2.995926000  | -2.486480000 |
| C | -1.974158000 | 3.286981000  | -2.306359000 |

|   |              |              |              |
|---|--------------|--------------|--------------|
| H | -2.824262000 | 2.954800000  | -1.681890000 |
| H | -2.167521000 | 2.954050000  | -3.347396000 |
| H | -1.976299000 | 4.397701000  | -2.312721000 |
| C | -3.452085000 | 0.787809000  | 1.339098000  |
| H | -3.760741000 | -0.216353000 | 1.709423000  |
| H | -2.724102000 | 1.186406000  | 2.077134000  |
| C | -1.964172000 | -2.573104000 | 3.257443000  |
| H | -1.627399000 | -2.278148000 | 4.276230000  |
| H | -3.072776000 | -2.460701000 | 3.250745000  |
| C | -5.733164000 | 1.203869000  | 0.299274000  |
| H | -6.620639000 | 1.874273000  | 0.284064000  |
| H | -6.105407000 | 0.199227000  | 0.608053000  |
| C | 4.140905000  | -2.226832000 | 2.901831000  |
| H | 4.795830000  | -2.733806000 | 3.628238000  |
| C | -5.103999000 | 1.105400000  | -1.098412000 |
| H | -4.848814000 | 2.133401000  | -1.446809000 |
| H | -5.840905000 | 0.709204000  | -1.831443000 |
| C | -1.601506000 | -4.034438000 | 2.960736000  |
| H | -0.503410000 | -4.174657000 | 3.094623000  |
| H | -2.092833000 | -4.715694000 | 3.690051000  |
| C | 3.878181000  | 1.510286000  | -3.019170000 |
| H | 4.240063000  | 1.236659000  | -4.022882000 |
| C | -4.697341000 | 1.693526000  | 1.322308000  |
| H | -5.145198000 | 1.742219000  | 2.339557000  |
| H | -4.392567000 | 2.734945000  | 1.066534000  |
| C | -1.990990000 | -4.398881000 | 1.522476000  |
| H | -3.101302000 | -4.384165000 | 1.428810000  |



|   |              |              |              |
|---|--------------|--------------|--------------|
| H | -1.675567000 | -5.437318000 | 1.278687000  |
| C | -0.626286000 | 1.459035000  | 4.243498000  |
| H | -0.681016000 | 2.439059000  | 4.764093000  |
| H | -0.417998000 | 0.684589000  | 5.011467000  |
| H | -1.628673000 | 1.254622000  | 3.816932000  |
| C | 3.873556000  | 3.025594000  | -1.116115000 |
| H | 4.224657000  | 3.947298000  | -0.626056000 |
| C | 4.349696000  | 2.676601000  | -2.392325000 |
| H | 5.084052000  | 3.320243000  | -2.902207000 |
| C | 1.844463000  | 1.744270000  | 3.805350000  |
| H | 2.661704000  | 1.756656000  | 3.057100000  |
| H | 2.091228000  | 0.963324000  | 4.554833000  |
| H | 1.853580000  | 2.723616000  | 4.329726000  |
| P | 1.331653000  | -0.152113000 | -0.237631000 |
| O | 0.635659000  | -3.453439000 | -2.436163000 |
| O | 2.564004000  | -2.397427000 | -1.815908000 |
| O | -1.324220000 | -1.402733000 | -3.424248000 |
| O | -2.727317000 | -2.556246000 | -2.064218000 |
| N | -0.091106000 | 0.622171000  | 0.329531000  |
| B | -1.371194000 | -0.153247000 | -0.133624000 |

110

Electronic Energy (BP86) = -2431.543060 a.u.

Zero-point correction (BP86) = 0.91946 a.u.

Thermal correction to Gibbs free Energy (BP86) = 0.832699 a.u.

Electronic Energy (M06) = -2433.341999 a.u.

3TS3, Number of imaginary frequency = 1(233.0i)

|   |             |              |              |
|---|-------------|--------------|--------------|
| C | 1.501931000 | -2.650276000 | -0.905521000 |
|---|-------------|--------------|--------------|

|   |              |              |              |
|---|--------------|--------------|--------------|
| C | -1.511496000 | -2.620217000 | -1.151221000 |
| C | 0.676753000  | -1.489238000 | -0.603947000 |
| C | 2.554134000  | -1.074123000 | 2.026638000  |
| H | 1.785571000  | -1.850051000 | 1.902794000  |
| C | -0.980148000 | 2.734515000  | -1.205408000 |
| C | -0.504854000 | 2.228604000  | 0.057309000  |
| C | -2.908945000 | 0.278320000  | 0.130632000  |
| H | -2.842951000 | 1.197786000  | -0.490250000 |
| C | -0.744448000 | -1.529649000 | -0.458698000 |
| C | 2.568005000  | 0.036847000  | 1.153762000  |
| C | -1.387852000 | -1.688875000 | 1.692658000  |
| H | -2.487553000 | -1.808853000 | 1.634977000  |
| C | -0.291967000 | 3.131951000  | 1.147210000  |
| C | 2.143289000  | 1.103611000  | -1.482566000 |
| C | -0.751677000 | -3.077919000 | 1.861725000  |
| H | 0.353955000  | -3.010906000 | 1.752689000  |
| H | -1.099947000 | -3.766261000 | 1.072586000  |
| C | -0.969833000 | -0.774406000 | 2.853152000  |
| H | -1.436631000 | 0.223064000  | 2.780939000  |
| H | 0.127063000  | -0.602886000 | 2.811026000  |
| C | 2.631531000  | 0.423382000  | -2.619847000 |
| H | 2.440681000  | -0.653088000 | -2.732039000 |
| C | -1.246625000 | 4.115837000  | -1.316253000 |
| H | -1.614868000 | 4.509974000  | -2.276819000 |
| C | -1.213512000 | 1.884769000  | -2.468892000 |
| H | -0.994165000 | 0.825087000  | -2.219640000 |
| C | -3.910428000 | -0.657960000 | -0.592922000 |

|   |              |              |              |
|---|--------------|--------------|--------------|
| H | -3.520651000 | -0.914556000 | -1.600878000 |
| H | -3.984980000 | -1.625786000 | -0.050063000 |
| C | -1.052921000 | 4.999403000  | -0.248333000 |
| H | -1.272379000 | 6.072624000  | -0.366542000 |
| C | 3.527383000  | -1.216428000 | 3.028119000  |
| H | 3.497528000  | -2.094278000 | 3.692814000  |
| C | 0.251168000  | 2.692669000  | 2.509770000  |
| H | 0.465790000  | 1.607742000  | 2.442938000  |
| C | -0.574750000 | 4.503461000  | 0.968549000  |
| H | -0.415568000 | 5.196523000  | 1.810406000  |
| C | 2.395620000  | 2.489814000  | -1.341427000 |
| H | 1.996692000  | 3.048861000  | -0.482006000 |
| C | 3.608281000  | 0.984264000  | 1.287464000  |
| H | 3.688530000  | 1.827727000  | 0.587687000  |
| C | -1.749226000 | -3.658965000 | -3.289410000 |
| H | -1.834076000 | -4.571719000 | -2.665499000 |
| H | -0.987623000 | -3.830650000 | -4.077081000 |
| C | 4.580383000  | 0.843737000  | 2.293016000  |
| H | 5.381796000  | 1.594474000  | 2.379980000  |
| C | 3.745250000  | -3.409514000 | -1.264692000 |
| H | 3.599976000  | -4.169952000 | -0.466771000 |
| H | 3.482148000  | -3.907599000 | -2.223667000 |
| C | -0.293021000 | 2.302930000  | -3.639036000 |
| H | -0.522330000 | 3.336804000  | -3.974863000 |
| H | -0.458921000 | 1.631385000  | -4.507459000 |
| H | 0.778442000  | 2.263875000  | -3.380290000 |
| C | -2.671117000 | 1.967485000  | -2.983086000 |

|   |              |              |              |
|---|--------------|--------------|--------------|
| H | -3.420082000 | 1.716367000  | -2.209356000 |
| H | -2.812664000 | 1.265934000  | -3.831453000 |
| H | -2.905111000 | 2.986374000  | -3.358642000 |
| C | -3.526583000 | 0.775637000  | 1.465784000  |
| H | -3.618282000 | -0.070580000 | 2.183635000  |
| H | -2.856169000 | 1.522429000  | 1.940907000  |
| C | -1.314592000 | -1.394323000 | 4.230179000  |
| H | -0.983637000 | -0.702842000 | 5.036801000  |
| H | -2.421860000 | -1.475523000 | 4.324743000  |
| C | -5.891690000 | 0.417904000  | 0.606669000  |
| H | -6.892398000 | 0.883246000  | 0.467968000  |
| H | -6.045523000 | -0.463505000 | 1.271832000  |
| C | 4.540450000  | -0.252365000 | 3.170872000  |
| H | 5.306850000  | -0.363503000 | 3.954412000  |
| C | -5.321570000 | -0.054794000 | -0.738540000 |
| H | -5.285689000 | 0.815217000  | -1.435231000 |
| H | -6.001486000 | -0.796959000 | -1.212014000 |
| C | -0.686655000 | -2.782770000 | 4.405628000  |
| H | 0.423246000  | -2.681323000 | 4.439169000  |
| H | -0.987600000 | -3.228827000 | 5.379179000  |
| C | 3.372605000  | 1.115840000  | -3.592993000 |
| H | 3.748301000  | 0.574757000  | -4.475823000 |
| C | -4.923383000 | 1.398762000  | 1.284609000  |
| H | -5.323518000 | 1.725407000  | 2.270032000  |
| H | -4.838760000 | 2.320054000  | 0.662528000  |
| C | -1.081496000 | -3.697429000 | 3.239004000  |
| H | -2.176197000 | -3.900168000 | 3.288578000  |

|   |              |              |              |
|---|--------------|--------------|--------------|
| H | -0.581602000 | -4.687316000 | 3.325441000  |
| C | -0.781601000 | 2.902532000  | 3.638631000  |
| H | -1.006021000 | 3.980508000  | 3.786938000  |
| H | -0.394312000 | 2.506740000  | 4.601072000  |
| H | -1.740837000 | 2.391213000  | 3.422226000  |
| C | 3.136852000  | 3.174584000  | -2.319838000 |
| H | 3.319786000  | 4.254422000  | -2.203781000 |
| C | 3.631780000  | 2.489231000  | -3.443265000 |
| H | 4.212968000  | 3.029304000  | -4.207506000 |
| C | 1.566038000  | 3.419142000  | 2.865762000  |
| H | 2.331932000  | 3.305219000  | 2.072940000  |
| H | 1.994579000  | 3.010535000  | 3.804891000  |
| H | 1.403020000  | 4.507194000  | 3.020183000  |
| P | 1.274274000  | 0.123270000  | -0.186205000 |
| O | 1.115398000  | -3.807343000 | -1.041419000 |
| O | 2.840180000  | -2.309781000 | -1.037633000 |
| O | -1.196207000 | -2.595298000 | -2.478391000 |
| O | -2.335289000 | -3.385776000 | -0.674612000 |
| N | -0.245298000 | 0.808664000  | 0.223691000  |
| B | -1.376252000 | -0.275015000 | 0.180226000  |
| C | -3.097125000 | -3.280050000 | -3.891039000 |
| H | -3.024964000 | -2.341541000 | -4.478376000 |
| H | -3.448767000 | -4.084818000 | -4.570570000 |
| H | -3.857432000 | -3.144728000 | -3.096479000 |
| C | 5.163975000  | -2.863940000 | -1.277418000 |
| H | 5.885554000  | -3.690263000 | -1.443162000 |
| H | 5.303411000  | -2.118289000 | -2.086762000 |

H 5.411860000 -2.375045000 -0.313490000

98

Electronic Energy (BP86) = -2274.538411 a.u.

Zero-point correction (BP86) = 0.811281 a.u.

Thermal correction to Gibbs free Energy (BP86) = 0.734666 a.u.

Electronic Energy (M06) = -2276.182965 a.u.

4TS3, Number of imaginary frequency = 1(241.8i)

C -0.783478000 2.163675000 -2.706930000

C 1.955757000 0.872206000 -2.802236000

C -0.324539000 1.163431000 -1.756819000

C -1.653334000 2.998084000 0.614191000

H -0.698624000 3.218313000 0.116410000

C -0.248520000 -2.923241000 0.333499000

C -0.266124000 -1.657429000 1.022225000

C 2.594421000 -1.081602000 -0.045043000

H 2.107776000 -2.079573000 -0.008336000

C 1.032802000 0.746483000 -1.628644000

C -2.210618000 1.703200000 0.515119000

C 2.129513000 1.806807000 0.038132000

H 3.175177000 1.457469000 -0.072828000

C -0.534980000 -1.620049000 2.428157000

C -2.671609000 -0.706137000 -0.977246000

C 2.000878000 3.176693000 -0.649404000

H 0.932840000 3.487516000 -0.695530000

H 2.354692000 3.126899000 -1.693799000

C 1.718554000 1.919474000 1.512801000

H 1.824787000 0.957594000 2.043257000

|   |              |              |              |
|---|--------------|--------------|--------------|
| H | 0.642560000  | 2.189383000  | 1.576975000  |
| C | -3.141396000 | -0.640250000 | -2.307451000 |
| H | -2.654387000 | 0.034686000  | -3.025322000 |
| C | -0.486037000 | -4.096144000 | 1.081687000  |
| H | -0.472837000 | -5.067656000 | 0.562234000  |
| C | 0.006680000  | -3.111713000 | -1.173708000 |
| H | 0.220285000  | -2.116492000 | -1.616865000 |
| C | 3.668561000  | -1.168470000 | -1.161186000 |
| H | 3.179958000  | -1.376464000 | -2.137267000 |
| H | 4.167762000  | -0.182305000 | -1.284945000 |
| C | -0.742275000 | -4.063465000 | 2.457065000  |
| H | -0.922958000 | -4.997705000 | 3.012438000  |
| C | -2.318462000 | 4.017102000  | 1.313641000  |
| H | -1.865558000 | 5.019458000  | 1.372167000  |
| C | -0.596952000 | -0.323270000 | 3.239569000  |
| H | -0.445993000 | 0.514581000  | 2.530810000  |
| C | -0.765616000 | -2.830687000 | 3.116676000  |
| H | -0.967114000 | -2.800484000 | 4.199574000  |
| C | -3.310775000 | -1.570534000 | -0.055391000 |
| H | -2.944712000 | -1.657918000 | 0.978395000  |
| C | -3.472747000 | 1.466840000  | 1.106818000  |
| H | -3.963513000 | 0.489306000  | 1.002000000  |
| H | 2.093552000  | 0.318497000  | -4.583118000 |
| C | -4.137127000 | 2.487292000  | 1.808531000  |
| H | -5.120055000 | 2.281379000  | 2.261060000  |
| C | -1.210633000 | -3.714659000 | -1.912533000 |
| H | -1.429742000 | -4.739976000 | -1.544853000 |

|   |              |              |              |
|---|--------------|--------------|--------------|
| H | -0.989889000 | -3.794885000 | -2.997610000 |
| H | -2.127866000 | -3.113427000 | -1.796925000 |
| C | 1.215434000  | -4.036659000 | -1.458219000 |
| H | 2.136294000  | -3.722737000 | -0.932097000 |
| H | 1.434326000  | -4.049555000 | -2.546312000 |
| H | 0.997120000  | -5.082938000 | -1.156221000 |
| C | 3.287407000  | -0.952730000 | 1.338318000  |
| H | 3.796689000  | 0.034471000  | 1.418543000  |
| H | 2.530227000  | -0.984030000 | 2.150150000  |
| C | 2.540247000  | 2.999905000  | 2.256939000  |
| H | 2.205295000  | 3.051821000  | 3.316821000  |
| H | 3.609704000  | 2.687979000  | 2.283160000  |
| C | 5.400079000  | -2.077121000 | 0.482072000  |
| H | 6.139134000  | -2.888308000 | 0.663786000  |
| H | 5.973881000  | -1.121293000 | 0.506081000  |
| C | -3.560761000 | 3.763403000  | 1.920413000  |
| H | -4.086040000 | 4.563450000  | 2.465917000  |
| C | 4.743209000  | -2.241462000 | -0.896338000 |
| H | 4.280592000  | -3.254288000 | -0.952219000 |
| H | 5.510508000  | -2.211724000 | -1.701014000 |
| C | 2.427320000  | 4.370894000  | 1.578025000  |
| H | 1.378559000  | 4.738984000  | 1.668298000  |
| H | 3.064673000  | 5.119839000  | 2.097804000  |
| C | -4.241265000 | -1.419441000 | -2.705844000 |
| H | -4.600094000 | -1.359652000 | -3.745472000 |
| C | 4.334267000  | -2.053609000 | 1.587939000  |
| H | 4.808105000  | -1.908363000 | 2.584018000  |



|   |              |              |              |
|---|--------------|--------------|--------------|
| H | 3.824108000  | -3.044161000 | 1.628158000  |
| C | 2.806553000  | 4.266217000  | 0.094719000  |
| H | 3.892025000  | 4.028350000  | 0.010597000  |
| H | 2.665698000  | 5.242657000  | -0.419002000 |
| C | 0.525136000  | -0.253507000 | 4.298310000  |
| H | 0.404733000  | -1.044241000 | 5.069386000  |
| H | 0.509126000  | 0.726547000  | 4.820049000  |
| H | 1.529194000  | -0.381809000 | 3.846715000  |
| C | -4.408699000 | -2.347088000 | -0.463358000 |
| H | -4.893178000 | -3.022682000 | 0.258996000  |
| C | -4.879050000 | -2.269633000 | -1.786208000 |
| H | -5.740610000 | -2.879166000 | -2.101969000 |
| C | -1.968881000 | -0.131540000 | 3.921082000  |
| H | -2.804743000 | -0.186613000 | 3.195547000  |
| H | -2.021637000 | 0.861105000  | 4.415469000  |
| H | -2.149737000 | -0.900984000 | 4.701831000  |
| P | -1.300203000 | 0.418015000  | -0.477413000 |
| O | -0.090242000 | 2.795103000  | -3.499215000 |
| O | -2.154399000 | 2.356642000  | -2.657755000 |
| O | 1.438179000  | 0.184502000  | -3.862244000 |
| O | 3.051036000  | 1.408455000  | -2.859054000 |
| N | -0.020801000 | -0.423543000 | 0.293647000  |
| B | 1.362757000  | -0.058875000 | -0.354474000 |
| H | -2.329457000 | 3.062892000  | -3.316975000 |

104

Electronic Energy (BP86) = -2352.976749 a.u.

Zero-point correction (BP86) = 0.861939 a.u.

Thermal correction to Gibbs free Energy (BP86) = 0.775226 a.u.

Electronic Energy (M06) = -2354.688592 a.u.

2TSl', Number of imaginary frequency = 1(112.5i)

|   |              |              |              |
|---|--------------|--------------|--------------|
| C | -1.676843000 | -2.213734000 | -2.629586000 |
| C | 1.952962000  | -1.692209000 | -2.690811000 |
| C | -0.560584000 | -1.610860000 | -1.879679000 |
| C | -3.867850000 | 0.294855000  | -1.030424000 |
| H | -3.736693000 | -0.677674000 | -1.525579000 |
| C | 0.327509000  | 2.933086000  | 1.183860000  |
| C | 0.067303000  | 2.077549000  | 0.061812000  |
| C | 1.262303000  | -1.559506000 | 1.226082000  |
| H | 0.285218000  | -2.021563000 | 0.952579000  |
| C | 0.702020000  | -1.543074000 | -2.005664000 |
| C | -2.829136000 | 0.811325000  | -0.220602000 |
| C | 2.827533000  | 0.456012000  | 0.143525000  |
| H | 3.138362000  | -0.373101000 | -0.546923000 |
| C | -0.197073000 | 2.654587000  | -1.223126000 |
| C | -1.973627000 | -1.182481000 | 1.539489000  |
| C | 3.028460000  | 1.754952000  | -0.672987000 |
| H | 2.799124000  | 2.640171000  | -0.038521000 |
| H | 2.319049000  | 1.795680000  | -1.518980000 |
| C | 3.883226000  | 0.420030000  | 1.287971000  |
| H | 3.799175000  | -0.507943000 | 1.887151000  |
| H | 3.681031000  | 1.253844000  | 1.995620000  |
| C | -2.342511000 | -2.540644000 | 1.420195000  |
| H | -2.187499000 | -3.061365000 | 0.463120000  |
| C | 0.371338000  | 4.329006000  | 0.983424000  |

|   |              |              |              |
|---|--------------|--------------|--------------|
| H | 0.580163000  | 4.984612000  | 1.843899000  |
| C | 0.523151000  | 2.439366000  | 2.622583000  |
| H | 0.575207000  | 1.332770000  | 2.597152000  |
| C | 2.323920000  | -2.623628000 | 0.843862000  |
| H | 2.319097000  | -2.794828000 | -0.250058000 |
| H | 3.343634000  | -2.255915000 | 1.094909000  |
| C | 0.158243000  | 4.897297000  | -0.276086000 |
| H | 0.206916000  | 5.989248000  | -0.413366000 |
| C | -5.070941000 | 1.001458000  | -1.195925000 |
| H | -5.865602000 | 0.580854000  | -1.832274000 |
| C | -0.571752000 | 1.870401000  | -2.487712000 |
| H | -0.746886000 | 0.814197000  | -2.202992000 |
| C | -0.130771000 | 4.058311000  | -1.356029000 |
| H | -0.314674000 | 4.502435000  | -2.346645000 |
| C | -2.189478000 | -0.514043000 | 2.763462000  |
| H | -1.921599000 | 0.546366000  | 2.870660000  |
| C | -3.027969000 | 2.054354000  | 0.423942000  |
| H | -2.242643000 | 2.493652000  | 1.052261000  |
| C | 3.711334000  | -3.180140000 | -3.233755000 |
| H | 3.620756000  | -3.013827000 | -4.326855000 |
| H | 3.980407000  | -4.232456000 | -3.027833000 |
| H | 4.493978000  | -2.498298000 | -2.841709000 |
| C | -4.230217000 | 2.760464000  | 0.249736000  |
| H | -4.362316000 | 3.730429000  | 0.754981000  |
| C | -3.715272000 | -3.414130000 | -2.505220000 |
| H | -4.420688000 | -3.744425000 | -1.721142000 |
| H | -3.316739000 | -4.286363000 | -3.062322000 |

|   |              |              |              |
|---|--------------|--------------|--------------|
| H | -4.221465000 | -2.742047000 | -3.227813000 |
| C | -0.669096000 | 2.841812000  | 3.522523000  |
| H | -0.562307000 | 2.402516000  | 4.537007000  |
| H | -1.646272000 | 2.514222000  | 3.112480000  |
| H | -0.723928000 | 3.944902000  | 3.640395000  |
| C | 1.827554000  | 2.959597000  | 3.262941000  |
| H | 2.004558000  | 2.465302000  | 4.241363000  |
| H | 1.782532000  | 4.053099000  | 3.451797000  |
| H | 2.707940000  | 2.769831000  | 2.619513000  |
| C | 1.230375000  | -1.398092000 | 2.778128000  |
| H | 2.184400000  | -0.939435000 | 3.122889000  |
| H | 0.426924000  | -0.695294000 | 3.081569000  |
| C | 5.324871000  | 0.554574000  | 0.762395000  |
| H | 6.042929000  | 0.547822000  | 1.612475000  |
| H | 5.566393000  | -0.341450000 | 0.143914000  |
| C | 2.072423000  | -3.785808000 | 3.097504000  |
| H | 1.872017000  | -4.755963000 | 3.603559000  |
| H | 3.079645000  | -3.456352000 | 3.444660000  |
| C | -5.255061000 | 2.240073000  | -0.559689000 |
| H | -6.194379000 | 2.799690000  | -0.693522000 |
| C | 2.098522000  | -3.962619000 | 1.571127000  |
| H | 1.129530000  | -4.401346000 | 1.236704000  |
| H | 2.884822000  | -4.692552000 | 1.277466000  |
| C | 5.509963000  | 1.819664000  | -0.090880000 |
| H | 5.401561000  | 2.717432000  | 0.562050000  |
| H | 6.540806000  | 1.862374000  | -0.506920000 |
| C | -2.922457000 | -3.215498000 | 2.509196000  |

|   |              |              |              |
|---|--------------|--------------|--------------|
| H | -3.210515000 | -4.273584000 | 2.402956000  |
| C | 1.026092000  | -2.738699000 | 3.510226000  |
| H | 1.050493000  | -2.576048000 | 4.610653000  |
| H | 0.008383000  | -3.123899000 | 3.274387000  |
| C | 4.464557000  | 1.883065000  | -1.214500000 |
| H | 4.646420000  | 1.058179000  | -1.941123000 |
| H | 4.570865000  | 2.829889000  | -1.788349000 |
| C | 0.552258000  | 1.858196000  | -3.547846000 |
| H | 0.183528000  | 1.377058000  | -4.477744000 |
| H | 1.438721000  | 1.279538000  | -3.225802000 |
| H | 0.870154000  | 2.891413000  | -3.805023000 |
| C | -2.756290000 | -1.196229000 | 3.852892000  |
| H | -2.915366000 | -0.664285000 | 4.804499000  |
| C | -3.128152000 | -2.547056000 | 3.727919000  |
| H | -3.578736000 | -3.077238000 | 4.581947000  |
| C | -1.872938000 | 2.404697000  | -3.130567000 |
| H | -1.709902000 | 3.390165000  | -3.616762000 |
| H | -2.693804000 | 2.522222000  | -2.397007000 |
| H | -2.214549000 | 1.706877000  | -3.923335000 |
| P | -1.373895000 | -0.324235000 | -0.004540000 |
| O | -1.718721000 | -2.298428000 | -3.843849000 |
| O | -2.655447000 | -2.724512000 | -1.818366000 |
| O | 2.453712000  | -2.962940000 | -2.575695000 |
| O | 2.534304000  | -0.802411000 | -3.308399000 |
| N | 0.086903000  | 0.628605000  | 0.277385000  |
| B | 1.358751000  | -0.111524000 | 0.503725000  |

Electronic Energy (BP86) = -2431.496590 a.u.

Zero-point correction (BP86) = 0.917135 a.u.

Thermal correction to Gibbs free Energy (BP86) = 0.826694 a.u.

Electronic Energy (M06) = -2433.290326 a.u.

3TS1', Number of imaginary frequency = 1(115.5i)

|   |              |              |              |
|---|--------------|--------------|--------------|
| C | 1.890923000  | 2.489887000  | -1.807466000 |
| C | -1.785456000 | 2.392342000  | -1.904732000 |
| C | 0.702424000  | 1.870248000  | -1.195528000 |
| C | 3.997124000  | -0.309700000 | -0.650743000 |
| H | 3.939846000  | 0.785801000  | -0.741752000 |
| C | -0.468411000 | -3.344875000 | 0.157560000  |
| C | -0.107051000 | -2.170815000 | -0.583473000 |
| C | -1.276203000 | 0.880872000  | 1.727492000  |
| H | -0.288886000 | 1.392172000  | 1.662235000  |
| C | -0.560837000 | 1.947871000  | -1.302030000 |
| C | 2.857179000  | -1.037592000 | -0.230951000 |
| C | -2.817417000 | -0.588376000 | -0.041825000 |
| H | -3.105098000 | 0.441026000  | -0.384484000 |
| C | 0.221075000  | -2.279953000 | -1.973945000 |
| C | 1.935351000  | 0.448685000  | 1.936019000  |
| C | -3.003971000 | -1.486535000 | -1.287430000 |
| H | -2.799179000 | -2.548112000 | -1.025345000 |
| H | -2.271381000 | -1.216001000 | -2.069411000 |
| C | -3.898973000 | -0.963995000 | 1.013303000  |
| H | -3.823920000 | -0.323828000 | 1.914518000  |
| H | -3.717073000 | -2.002877000 | 1.366337000  |
| C | 2.297359000  | 1.788811000  | 2.197943000  |

|   |              |              |              |
|---|--------------|--------------|--------------|
| H | 2.171691000  | 2.548615000  | 1.410991000  |
| C | -0.537239000 | -4.582286000 | -0.516671000 |
| H | -0.821144000 | -5.483580000 | 0.049003000  |
| C | -0.745815000 | -3.359370000 | 1.665846000  |
| H | -0.860721000 | -2.309688000 | 2.001357000  |
| C | -2.318211000 | 2.029689000  | 1.710282000  |
| H | -2.270291000 | 2.572723000  | 0.745942000  |
| H | -3.349208000 | 1.617228000  | 1.785391000  |
| C | -0.259635000 | -4.690324000 | -1.883314000 |
| H | -0.330934000 | -5.664215000 | -2.393251000 |
| C | 5.205031000  | -0.966498000 | -0.935755000 |
| H | 6.079075000  | -0.380595000 | -1.261542000 |
| C | 0.703568000  | -1.126389000 | -2.861632000 |
| H | 0.889889000  | -0.247297000 | -2.214962000 |
| C | 0.121888000  | -3.546058000 | -2.589502000 |
| H | 0.355456000  | -3.629625000 | -3.662376000 |
| C | 2.121435000  | -0.527812000 | 2.938206000  |
| H | 1.864900000  | -1.578893000 | 2.741485000  |
| C | 2.958448000  | -2.441523000 | -0.103439000 |
| H | 2.094007000  | -3.041776000 | 0.206601000  |
| C | -3.384444000 | 4.175809000  | -1.998189000 |
| H | -3.472596000 | 3.829199000  | -3.047865000 |
| H | -3.212307000 | 5.271595000  | -1.990562000 |
| C | 4.169612000  | -3.093712000 | -0.394229000 |
| H | 4.227017000  | -4.189148000 | -0.292698000 |
| C | 3.955338000  | 3.631711000  | -1.384632000 |
| H | 4.742057000  | 3.465958000  | -0.621281000 |

|   |              |              |              |
|---|--------------|--------------|--------------|
| H | 4.266750000  | 3.166448000  | -2.342361000 |
| C | 0.437890000  | -3.974597000 | 2.447991000  |
| H | 0.257368000  | -3.920222000 | 3.542596000  |
| H | 1.399085000  | -3.463718000 | 2.236959000  |
| H | 0.574986000  | -5.044705000 | 2.182594000  |
| C | -2.039197000 | -4.116299000 | 2.035629000  |
| H | -2.293740000 | -3.947497000 | 3.102958000  |
| H | -1.928704000 | -5.212735000 | 1.897400000  |
| H | -2.900843000 | -3.788055000 | 1.422273000  |
| C | -1.292942000 | 0.187093000  | 3.125595000  |
| H | -2.259061000 | -0.348658000 | 3.264481000  |
| H | -0.502407000 | -0.589738000 | 3.184081000  |
| C | -5.328055000 | -0.875111000 | 0.445589000  |
| H | -6.067041000 | -1.176373000 | 1.221141000  |
| H | -5.551011000 | 0.189663000  | 0.200294000  |
| C | -2.129826000 | 2.325427000  | 4.234971000  |
| H | -1.940311000 | 3.054862000  | 5.053155000  |
| H | -3.149151000 | 1.911338000  | 4.417309000  |
| C | 5.295065000  | -2.363459000 | -0.812044000 |
| H | 6.239461000  | -2.882005000 | -1.041354000 |
| C | -2.107410000 | 3.025032000  | 2.866457000  |
| H | -1.125704000 | 3.536329000  | 2.733536000  |
| H | -2.879643000 | 3.824741000  | 2.826518000  |
| C | -5.497789000 | -1.728053000 | -0.822033000 |
| H | -5.407860000 | -2.806006000 | -0.550002000 |
| H | -6.519064000 | -1.600045000 | -1.244296000 |
| C | 2.835146000  | 2.143905000  | 3.447796000  |



|   |              |              |              |
|---|--------------|--------------|--------------|
| H | 3.118424000  | 3.190878000  | 3.640952000  |
| C | -1.102000000 | 1.183731000  | 4.283969000  |
| H | -1.160082000 | 0.648649000  | 5.257788000  |
| H | -0.075512000 | 1.611143000  | 4.223013000  |
| C | -4.426666000 | -1.380864000 | -1.867547000 |
| H | -4.586018000 | -0.341671000 | -2.236185000 |
| H | -4.524931000 | -2.042856000 | -2.755934000 |
| C | -0.344560000 | -0.676247000 | -3.903444000 |
| H | 0.097001000  | 0.103526000  | -4.558088000 |
| H | -1.243672000 | -0.227111000 | -3.439357000 |
| H | -0.659959000 | -1.524835000 | -4.548181000 |
| C | 2.647192000  | -0.165290000 | 4.189366000  |
| H | 2.783706000  | -0.934451000 | 4.966219000  |
| C | 3.007342000  | 1.170286000  | 4.446472000  |
| H | 3.425073000  | 1.450092000  | 5.426650000  |
| C | 2.032244000  | -1.460988000 | -3.578243000 |
| H | 1.883707000  | -2.211614000 | -4.383724000 |
| H | 2.800660000  | -1.856014000 | -2.884915000 |
| H | 2.436138000  | -0.545047000 | -4.057187000 |
| P | 1.405033000  | 0.039315000  | 0.197248000  |
| O | 2.039897000  | 2.640902000  | -3.008360000 |
| O | 2.800042000  | 2.910831000  | -0.875431000 |
| O | -2.179552000 | 3.614308000  | -1.421251000 |
| O | -2.413895000 | 1.764888000  | -2.755628000 |
| N | -0.092533000 | -0.887773000 | 0.124960000  |
| B | -1.357360000 | -0.222488000 | 0.544272000  |
| C | -4.627321000 | 3.806369000  | -1.197301000 |

|   |              |             |              |
|---|--------------|-------------|--------------|
| H | -4.540685000 | 4.135376000 | -0.141812000 |
| H | -5.519592000 | 4.297642000 | -1.639477000 |
| H | -4.797528000 | 2.711266000 | -1.213839000 |
| C | 3.656258000  | 5.113838000 | -1.569076000 |
| H | 3.303552000  | 5.573414000 | -0.623470000 |
| H | 4.576767000  | 5.644793000 | -1.889420000 |
| H | 2.884942000  | 5.264889000 | -2.349952000 |

98

Electronic Energy (BP86) = -2274.491631 a.u.

Zero-point correction (BP86) = 0.808904 a.u.

Thermal correction to Gibbs free Energy (BP86) = 0.72825 a.u.

Electronic Energy (M06) = -2276.130676 a.u.

4TS3, Number of imaginary frequency = 1(121.4i)

|   |              |              |              |
|---|--------------|--------------|--------------|
| C | -1.942741000 | 0.715034000  | 3.383455000  |
| C | 1.821424000  | 0.624839000  | 3.330998000  |
| C | -0.721960000 | 0.725491000  | 2.561222000  |
| C | -4.046351000 | -0.301789000 | 0.489726000  |
| H | -3.989004000 | 0.443174000  | 1.298499000  |
| C | 0.452294000  | -2.184005000 | -1.993806000 |
| C | 0.054145000  | -1.815801000 | -0.664455000 |
| C | 1.405764000  | 1.924975000  | -0.331091000 |
| H | 0.485913000  | 2.326433000  | 0.148563000  |
| C | 0.534398000  | 0.712805000  | 2.722030000  |
| C | -2.881551000 | -0.618414000 | -0.252996000 |
| C | 2.813437000  | -0.433222000 | -0.027593000 |
| H | 3.183546000  | 0.137181000  | 0.864727000  |
| C | -0.345147000 | -2.825654000 | 0.267422000  |

|   |              |              |              |
|---|--------------|--------------|--------------|
| C | -1.857450000 | 1.966285000  | -0.581558000 |
| C | 2.934163000  | -1.920917000 | 0.380363000  |
| H | 2.662480000  | -2.576082000 | -0.476269000 |
| H | 2.221478000  | -2.158201000 | 1.191318000  |
| C | 3.859742000  | -0.138882000 | -1.144057000 |
| H | 3.825265000  | 0.920995000  | -1.468147000 |
| H | 3.603048000  | -0.738972000 | -2.044148000 |
| C | -1.928505000 | 3.128823000  | 0.218538000  |
| H | -1.612874000 | 3.087541000  | 1.271901000  |
| C | 0.455406000  | -3.549332000 | -2.346908000 |
| H | 0.758856000  | -3.838009000 | -3.364418000 |
| C | 0.836597000  | -1.168902000 | -3.078133000 |
| H | 1.199536000  | -0.253644000 | -2.569773000 |
| C | 2.576809000  | 2.682325000  | 0.348105000  |
| H | 2.607271000  | 2.450143000  | 1.431376000  |
| H | 3.548223000  | 2.340384000  | -0.072445000 |
| C | 0.090016000  | -4.545803000 | -1.434275000 |
| H | 0.111144000  | -5.607111000 | -1.728733000 |
| C | -5.273411000 | -0.918138000 | 0.200024000  |
| H | -6.166137000 | -0.657419000 | 0.790416000  |
| C | -0.849297000 | -2.563599000 | 1.692338000  |
| H | -1.006594000 | -1.473863000 | 1.807191000  |
| C | -0.304684000 | -4.174996000 | -0.146599000 |
| H | -0.598347000 | -4.955456000 | 0.572504000  |
| C | -2.302198000 | 2.025866000  | -1.920911000 |
| H | -2.293157000 | 1.121821000  | -2.547874000 |
| C | -2.978720000 | -1.569507000 | -1.293760000 |

|   |              |              |              |
|---|--------------|--------------|--------------|
| H | -2.097659000 | -1.848381000 | -1.884242000 |
| C | -4.211451000 | -2.184746000 | -1.577332000 |
| H | -4.266434000 | -2.923993000 | -2.392170000 |
| C | -0.386573000 | -0.765332000 | -3.929119000 |
| H | -0.107499000 | -0.002049000 | -4.685940000 |
| H | -1.200113000 | -0.342687000 | -3.308536000 |
| H | -0.799912000 | -1.644795000 | -4.467969000 |
| C | 1.966058000  | -1.654585000 | -4.009973000 |
| H | 2.337171000  | -0.810526000 | -4.627663000 |
| H | 1.617442000  | -2.438891000 | -4.714969000 |
| H | 2.825428000  | -2.068520000 | -3.445590000 |
| C | 1.314980000  | 2.341623000  | -1.832509000 |
| H | 2.204162000  | 1.950903000  | -2.378754000 |
| H | 0.430132000  | 1.870418000  | -2.309804000 |
| C | 5.293702000  | -0.493137000 | -0.707061000 |
| H | 6.006725000  | -0.293945000 | -1.537924000 |
| H | 5.592826000  | 0.181671000  | 0.128657000  |
| C | 2.409847000  | 4.590444000  | -1.329433000 |
| H | 2.311279000  | 5.691943000  | -1.448666000 |
| H | 3.368628000  | 4.308520000  | -1.824352000 |
| C | -5.360197000 | -1.866596000 | -0.834136000 |
| H | -6.320766000 | -2.356232000 | -1.059620000 |
| C | 2.479283000  | 4.207543000  | 0.157281000  |
| H | 1.567805000  | 4.585838000  | 0.676001000  |
| H | 3.343022000  | 4.708393000  | 0.647633000  |
| C | 5.405418000  | -1.953594000 | -0.240518000 |
| H | 5.241521000  | -2.626976000 | -1.114471000 |

|   |              |              |              |
|---|--------------|--------------|--------------|
| H | 6.433472000  | -2.167768000 | 0.126608000  |
| C | -2.424959000 | 4.330321000  | -0.316373000 |
| H | -2.481404000 | 5.226797000  | 0.321090000  |
| C | 1.246416000  | 3.868669000  | -2.027070000 |
| H | 1.231462000  | 4.110784000  | -3.112976000 |
| H | 0.283265000  | 4.241806000  | -1.611512000 |
| C | 4.361436000  | -2.271630000 | 0.841700000  |
| H | 4.591100000  | -1.694167000 | 1.766287000  |
| H | 4.415780000  | -3.345547000 | 1.126100000  |
| C | 0.165573000  | -2.962555000 | 2.786003000  |
| H | -0.294145000 | -2.818149000 | 3.785630000  |
| H | 1.081993000  | -2.340938000 | 2.763888000  |
| H | 0.457660000  | -4.030769000 | 2.693449000  |
| C | -2.782033000 | 3.231969000  | -2.456987000 |
| H | -3.119145000 | 3.265832000  | -3.505228000 |
| C | -2.847155000 | 4.386310000  | -1.655400000 |
| H | -3.234149000 | 5.328507000  | -2.075007000 |
| C | -2.207666000 | -3.249568000 | 1.963602000  |
| H | -2.098192000 | -4.350905000 | 2.059148000  |
| H | -2.947037000 | -3.051076000 | 1.162565000  |
| H | -2.626118000 | -2.878829000 | 2.922059000  |
| P | -1.397988000 | 0.369879000  | 0.267917000  |
| O | -2.150544000 | -0.048684000 | 4.309695000  |
| O | -2.842081000 | 1.680880000  | 3.019538000  |
| O | 2.322806000  | 1.844308000  | 3.708830000  |
| O | 2.449015000  | -0.419019000 | 3.513161000  |
| N | 0.087214000  | -0.392768000 | -0.312780000 |

|   |              |             |              |
|---|--------------|-------------|--------------|
| B | 1.390657000  | 0.311581000 | -0.198713000 |
| H | -3.584427000 | 1.595903000 | 3.659579000  |
| H | 3.209421000  | 1.639575000 | 4.082096000  |

## S6. References:

1. S. Pal, N. Kathewad, R. Pant and S. Khan, *Inorg. Chem.*, 2015, **54**, 10172-10183.
2. M. J. Frisch, G. W. Trucks, H. B. Schlegel, G. E. Scuseria, M. A. Robb, J. R. Cheeseman, G. Scalmani, V. Barone, B. Mennucci, G. A. Petersson, H. Nakatsuji, M. Caricato, X. Li, H. P. Hratchian, A. F. Izmaylov, J. Bloino, G. Zheng, J. L. Sonnenberg, M. Hada, M. Ehara, K. Toyota, R. Fukuda, J. Hasegawa, M. Ishida, T. Nakajima, Y. Honda, O. Kitao, H. Nakai, T. Vreven, J. A. Montgomery, Jr., J. E. Peralta, F. Ogliaro, M. Bearpark, J. J. Heyd, E. Brothers, K. N. Kudin, V. N. Staroverov, T. Keith, R. Kobayashi, J. Normand, K. Raghavachari, A. Rendell, J. C. Burant, S. S. Iyengar, J. Tomasi, M. Cossi, N. Rega, J. M. Millam, M. Klene, J. E. Knox, J. B. Cross, V. Bakken, C. Adamo, J. Jaramillo, R. Gomperts, R. E. Stratmann, O. Yazyev, A. J. Austin, R. Cammi, C. Pomelli, J. W. Ochterski, R. L. Martin, K. Morokuma, V. G. Zakrzewski, G. A. Voth, P. Salvador, J. J. Dannenberg, S. Dapprich, A. D. Daniels, O. Farkas, J. B. Foresman, J. V. Ortiz, J. Cioslowski and D. J. Fox, Gaussian, Inc., Wallingford CT, 2010.
3. (a) A. D. Becke, *Phys. Rev. A*, 1988, **38**, 3098–3100; (b) J. P. Perdew, *Phys. Rev. B.*, 1986, **33**, 8822–8824.
4. (a) F. Weigend and R. Ahlrichs, *Phys. Chem. Chem. Phys.*, 2005, **7**, 3297–3303; (b) A. Schaefer, H. Horn and R. J. Ahlrichs, *J. Chem. Phys.*, 1992, **97**, 2571 – 2577.
5. Y. Zhao and D. G. Truhlar, *Theor. Chem. Acc.*, 2008, **120**, 215 – 241.
6. (a) A. E. Reed, L. A. Curtiss and F. Weinhold, *Chem. Rev.*, 1988, **88**, 899 – 926; (b) NBO 6.0. E. D. Glendening, J. K. Badenhoop, A. E. Reed, J. E. Carpenter, J. A. Bohmann, C. M. Morales, C. R. Landis and F. Weinhold (Theoretical Chemistry Institute, University of Wisconsin, Madison, WI, 2013; <http://nbo6.chem.wisc.edu/>).
7. (a) T. Lu and F. Chen, *J. Comput. Chem.*, 2012, **33**, 580 – 592; (b) T. Lu and F. Chen, *J. Mol. Graphics Modell.*, 2012, **38**, 314 – 323.
8. (a) S. P. Sarish, P. P. Samuel, H. W. Roesky, C. Schulzke, K. Nijesh, S. De and P. Parameswaran, *Chem. Eur. J.*, 2015, **21**, 19041–19047; (b) Z. Yang, M. Zhong, X. Ma, K. Nijesh, S. De, P. Parameswaran and H. W. Roesky, *J. Am. Chem. Soc.*, 2016, **138**, 2548–2551; (c) Z. Yang, M. Zhong, X. Ma, S. De, C. Anusha, P. Parameswaran and H. W. Roesky, *Angew. Chem., Int. Ed.*, 2015, **35**, 10225 - 10229.
